# Supplementary material for: Synthesis and characterization of divalent metal–betaine–bistriflimide complexes: a property comparison with metal bistriflimide salts
Source: Royal Society of Chemistry journal article supplement (doi:10.1039/d4dt01950d), 2024-01-01
Supplement: d4dt01950d1.pdf [file d4dt01950d1.pdf]

## Synthesis and Characterization of divalent metal-betaine-bistriflimide complexes: a property comparison with metal bistriflimide salts

Luca Guglielmero<sup>\*a</sup>, Lidia Ciccone,<sup>b,c</sup> Andrea Mezzetta<sup>b</sup>, Felicia D'Andrea<sup>b</sup>, Lorenzo Guazzelli<sup>b</sup>, Christian Silvio Pomelli<sup>b</sup>.

<sup>a</sup> Scuola Normale Superiore, Piazza dei Cavalieri 7, 56126 Pisa.

<sup>b</sup> Università di Pisa, Dipartimento di Farmacia, Via Bonanno 33, 56126 Pisa.

<sup>c</sup> Centre for Instrumentation Sharing of the University of Pisa (CISUP), Lungarno Pacinotti 43, 56126 Pisa, Italy.

### *Supporting information*

|                                                                                                                                                                                 |               |
|---------------------------------------------------------------------------------------------------------------------------------------------------------------------------------|---------------|
| <sup>1</sup> H-NMR and <sup>13</sup> C-NMR spectra of [HBet][Tf <sub>2</sub> N] and M[Bet] <sub>2-3</sub> [Tf <sub>2</sub> N] <sub>2</sub>                                      | Pages S2-S7   |
| Crystallographic data for Calcium(II) and Copper(II) complexes                                                                                                                  | Page S8       |
| ATR-FTIR spectra of M[Bet] <sub>2-3</sub> [Tf <sub>2</sub> N] <sub>2</sub> , M[Tf <sub>2</sub> N] <sub>2</sub> and organic precursors                                           | Pages S9-S18  |
| TGA of M[Bet] <sub>2</sub> [Tf <sub>2</sub> N] <sub>2</sub> , M[Bet] <sub>3</sub> [Tf <sub>2</sub> N] <sub>2</sub> and M[Tf <sub>2</sub> N] <sub>2</sub> and organic precursors | Pages S19-S28 |
| DSC of M[Bet] <sub>2</sub> [Tf <sub>2</sub> N] <sub>2</sub> , M[Bet] <sub>3</sub> [Tf <sub>2</sub> N] and M[Tf <sub>2</sub> N] <sub>2</sub>                                     | Pages S29-S39 |
| Cyclic voltammetries of M[Bet] <sub>2</sub> [Tf <sub>2</sub> N] <sub>2</sub> and M[Tf <sub>2</sub> N] <sub>2</sub> and data fitting                                             | Pages S40-S46 |

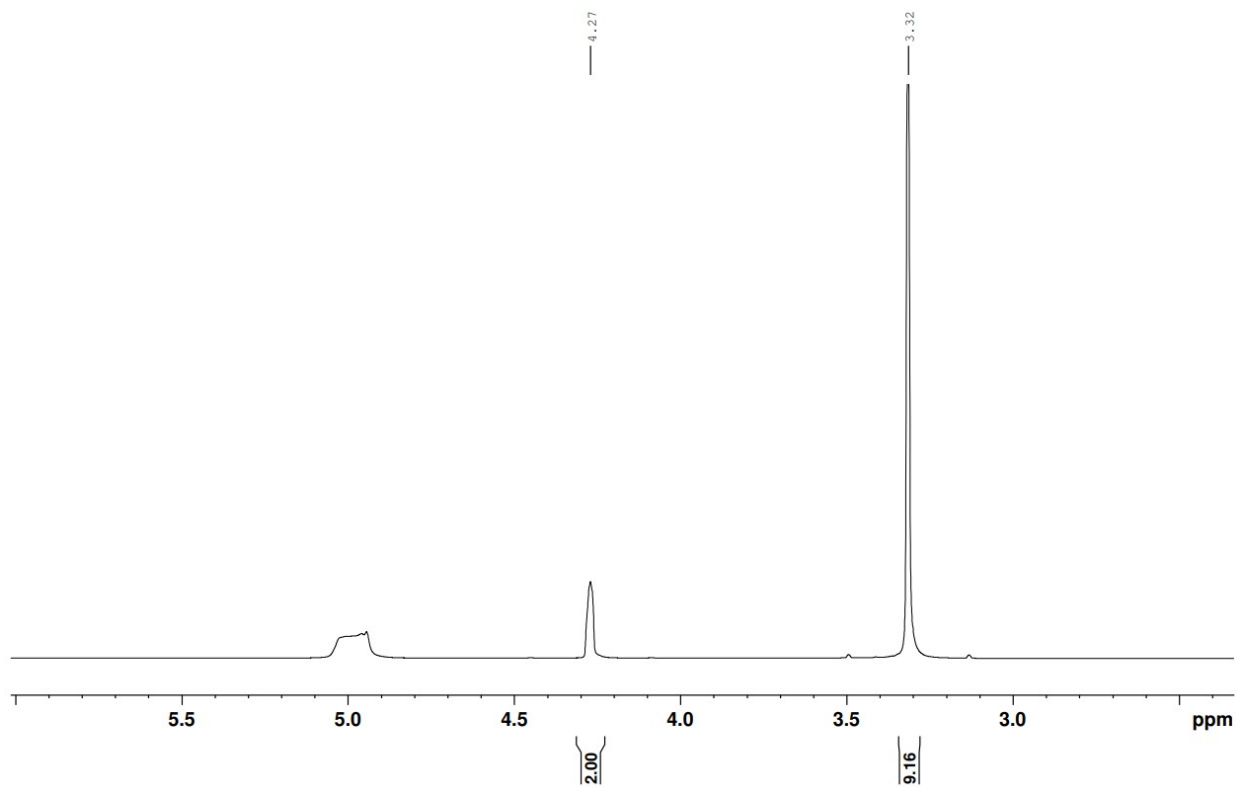

**Figure S1.**  $^1\text{H-NMR}$  spectrum of  $[\text{HBet}][\text{Tf}_2\text{N}]$  in  $\text{CD}_3\text{OD}$ .

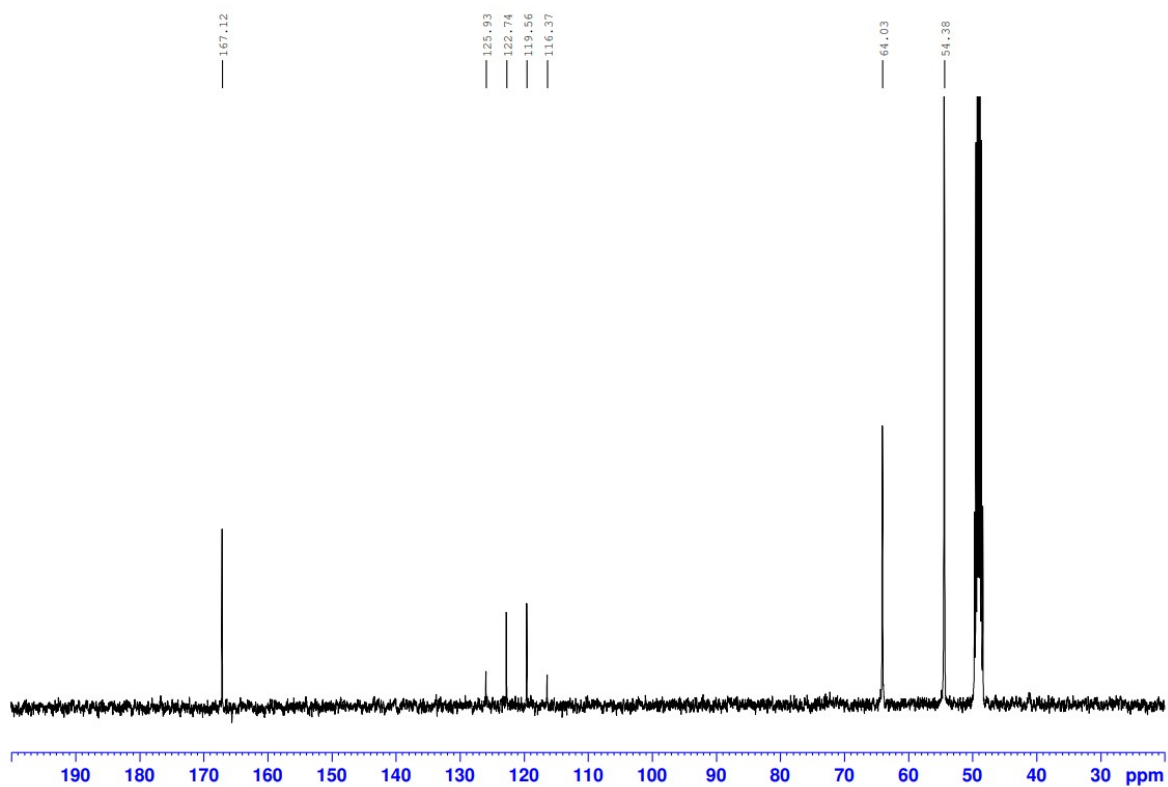

**Figure S2.**  $^{13}\text{C-NMR}$  spectrum of  $[\text{HBet}][\text{Tf}_2\text{N}]$  in  $\text{CD}_3\text{OD}$ .

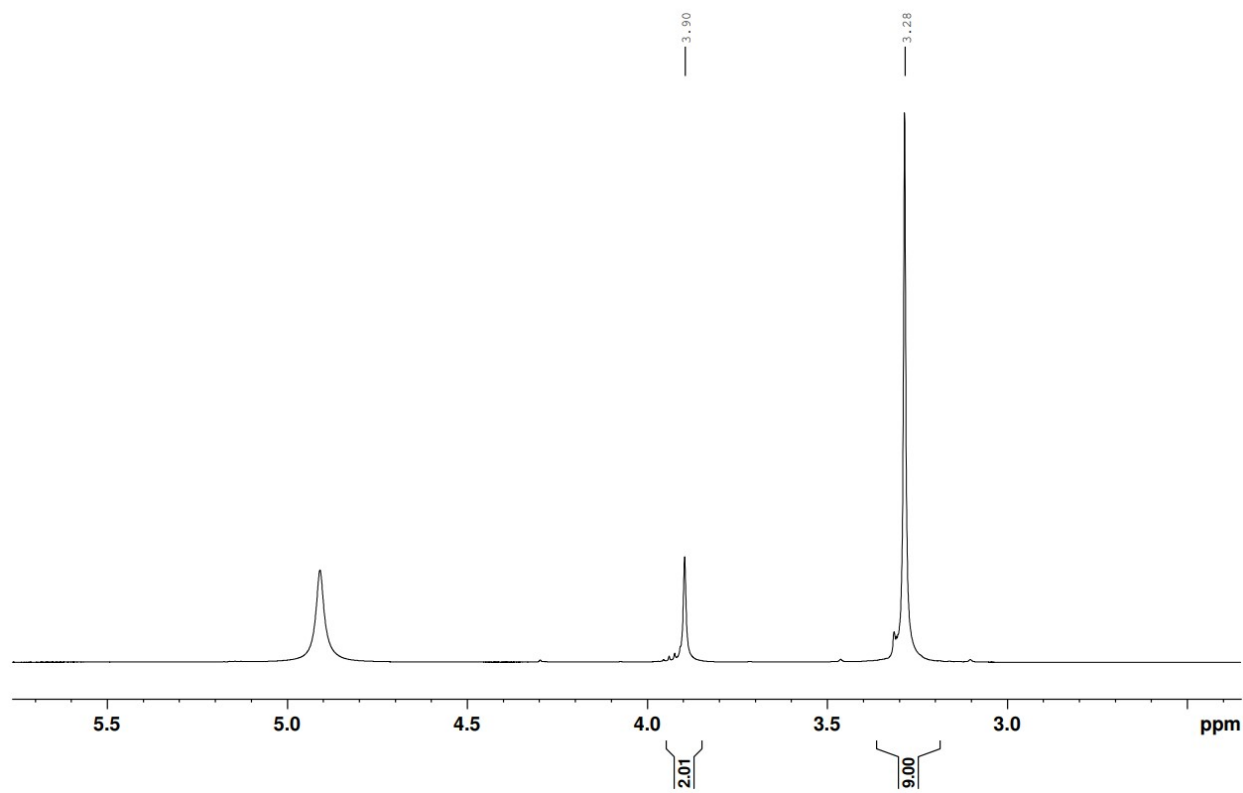

**Figure S3.**  $^1\text{H-NMR}$  spectrum of  $\text{Mg}[\text{Bet}]_2[\text{Tf}_2\text{N}]_2$  in  $\text{CD}_3\text{OD}$ .

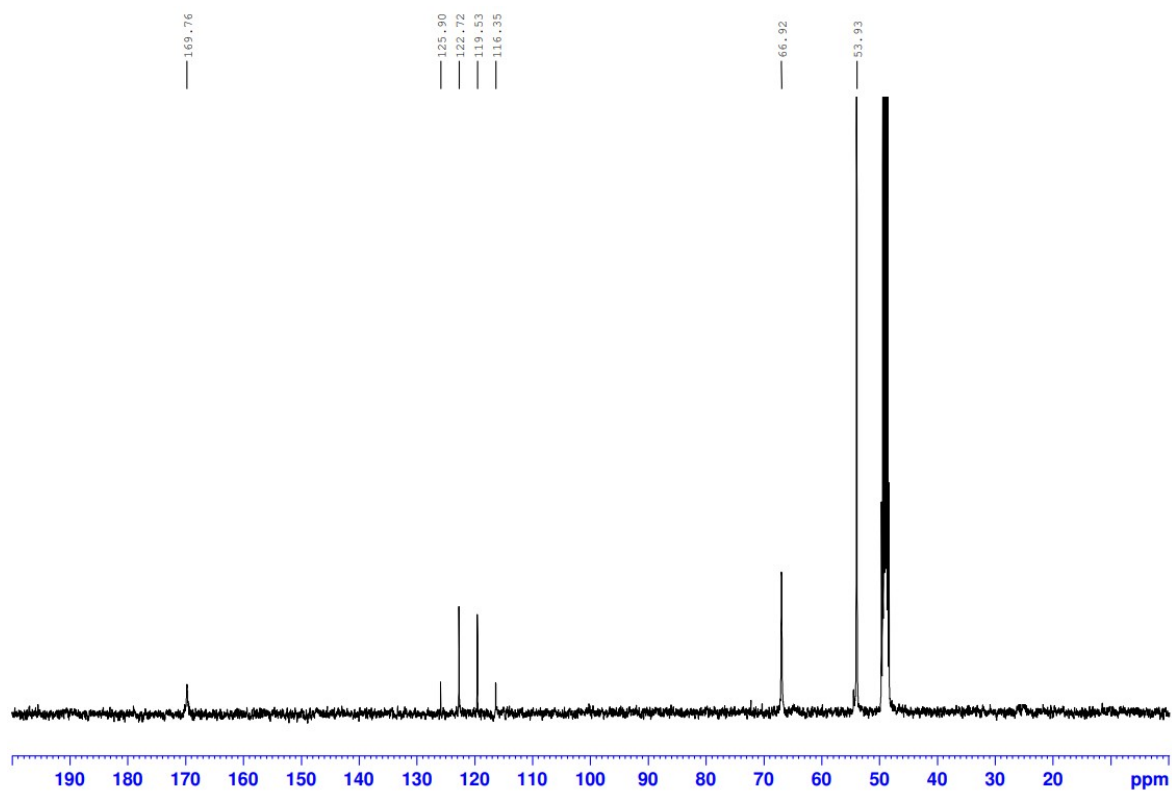

**Figure S4.**  $^{13}\text{C-NMR}$  spectrum of  $\text{Mg}[\text{Bet}]_2[\text{Tf}_2\text{N}]_2$  in  $\text{CD}_3\text{OD}$ .

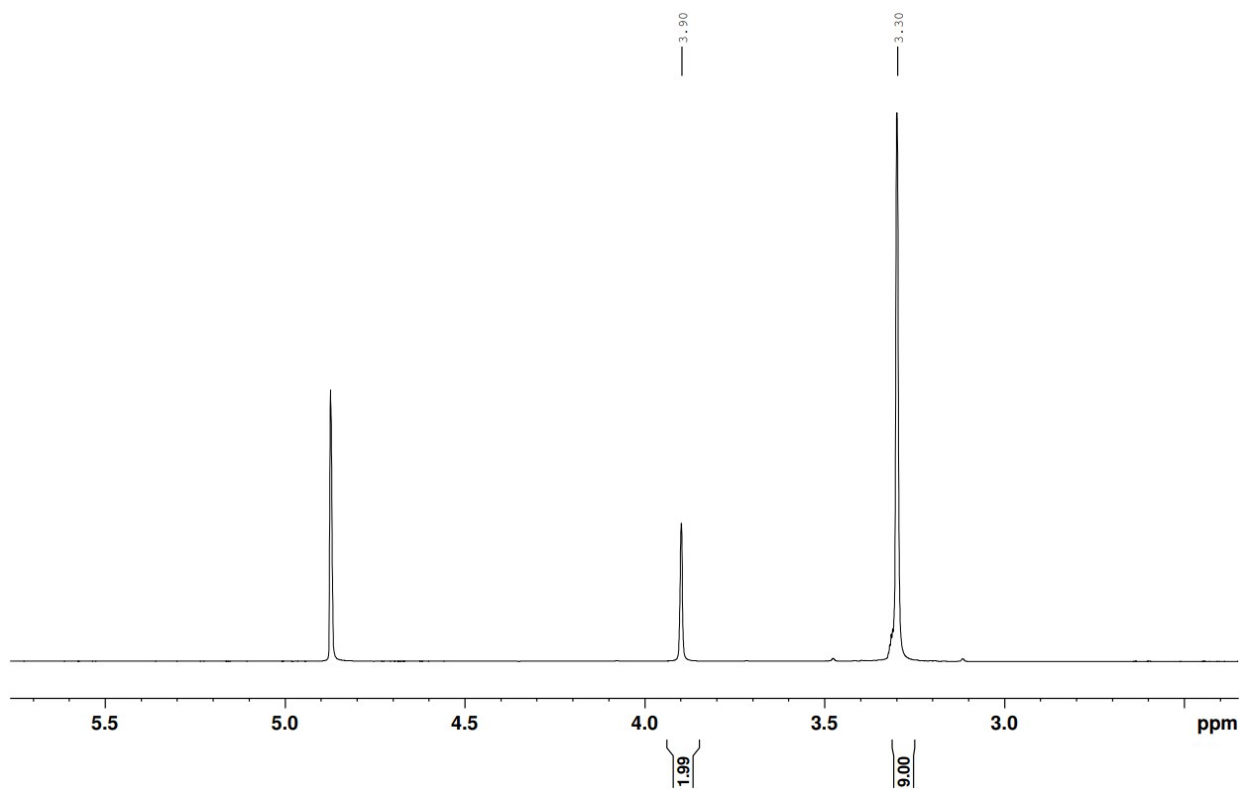

**Figure S5.**  $^1\text{H-NMR}$  spectrum of  $\text{Ca}[\text{Bet}]_2[\text{Tf}_2\text{N}]_2$  in  $\text{CD}_3\text{OD}$ .

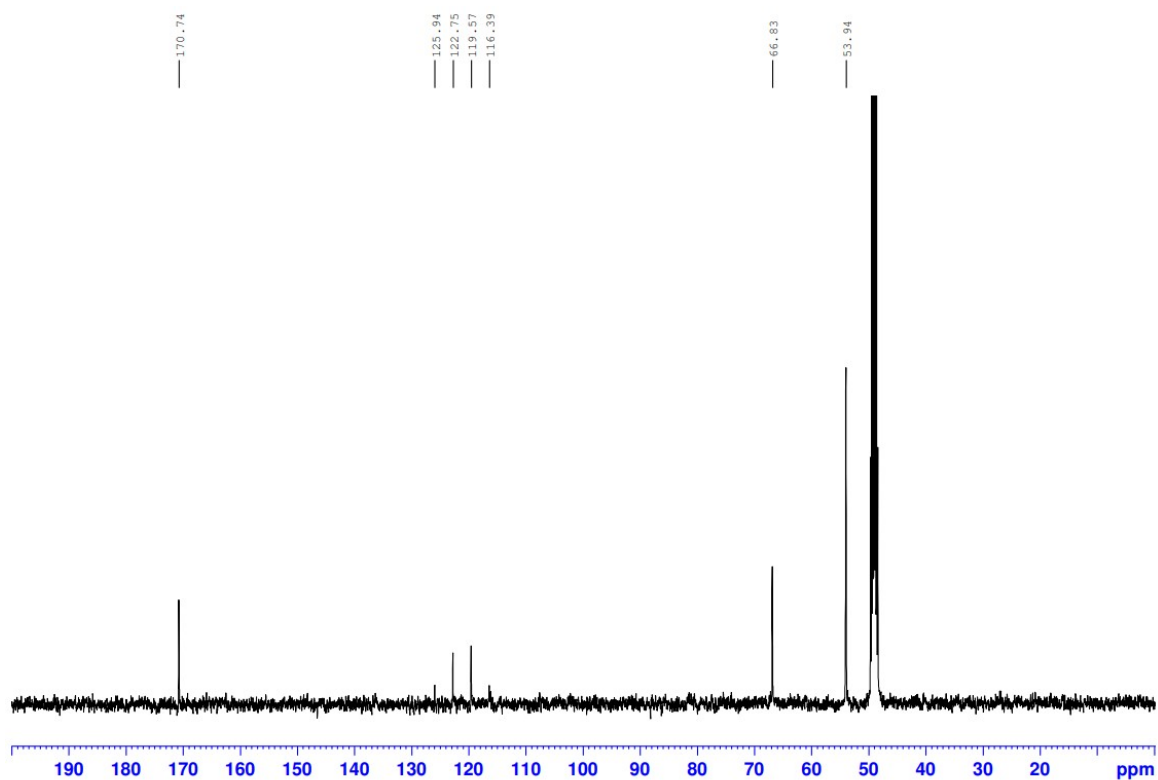

**Figure S6.**  $^{13}\text{C-NMR}$  spectrum of  $\text{Ca}[\text{Bet}]_2[\text{Tf}_2\text{N}]_2$  in  $\text{CD}_3\text{OD}$ .

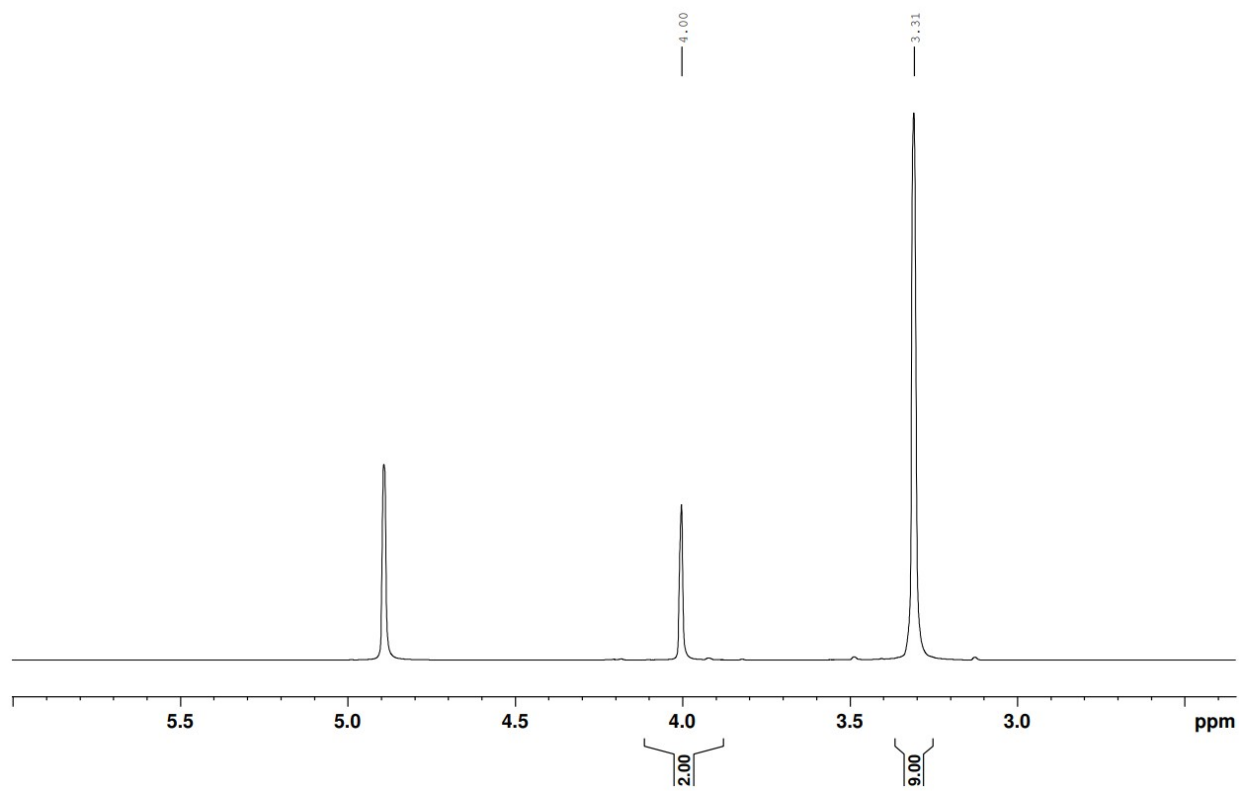

**Figure S7.**  $^1\text{H}$ -NMR spectrum of  $\text{Zn}[\text{Bet}]_2[\text{Tf}_2\text{N}]_2$  in  $\text{CD}_3\text{OD}$ .

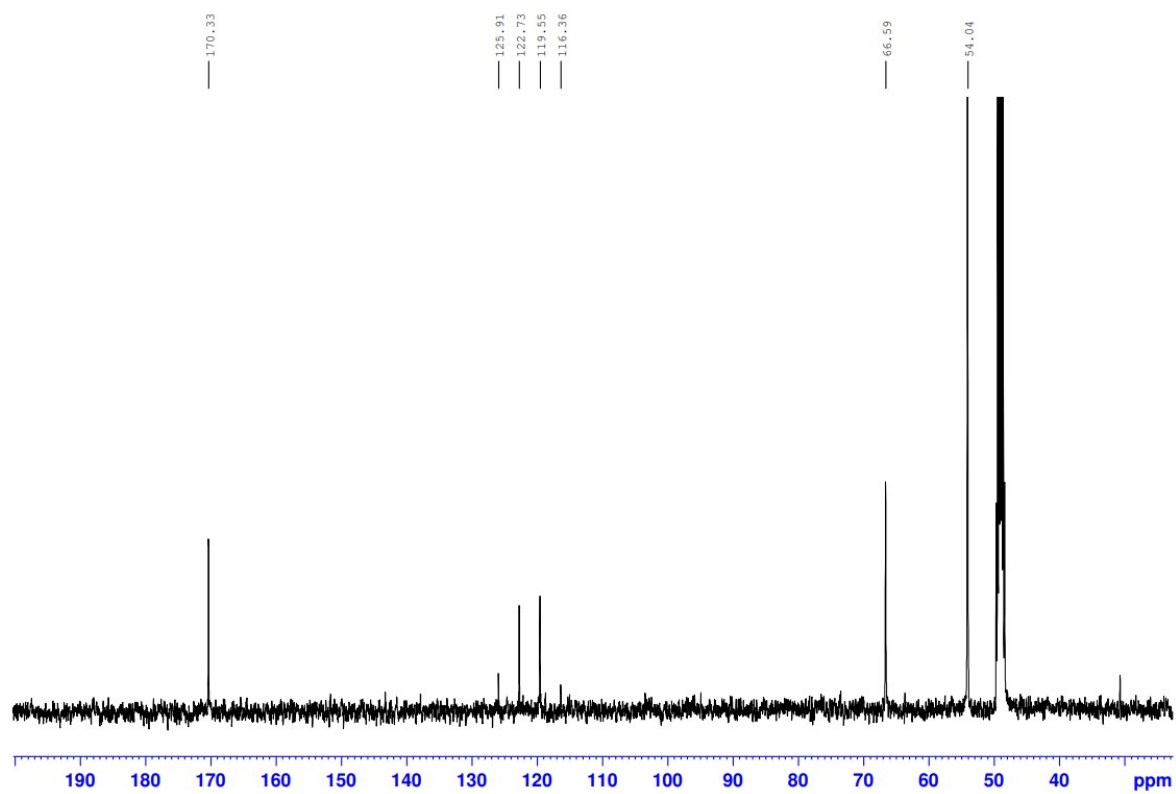

**Figure S8.**  $^{13}\text{C}$ -NMR spectrum of  $\text{Zn}[\text{Bet}]_2[\text{Tf}_2\text{N}]_2$  in  $\text{CD}_3\text{OD}$ .

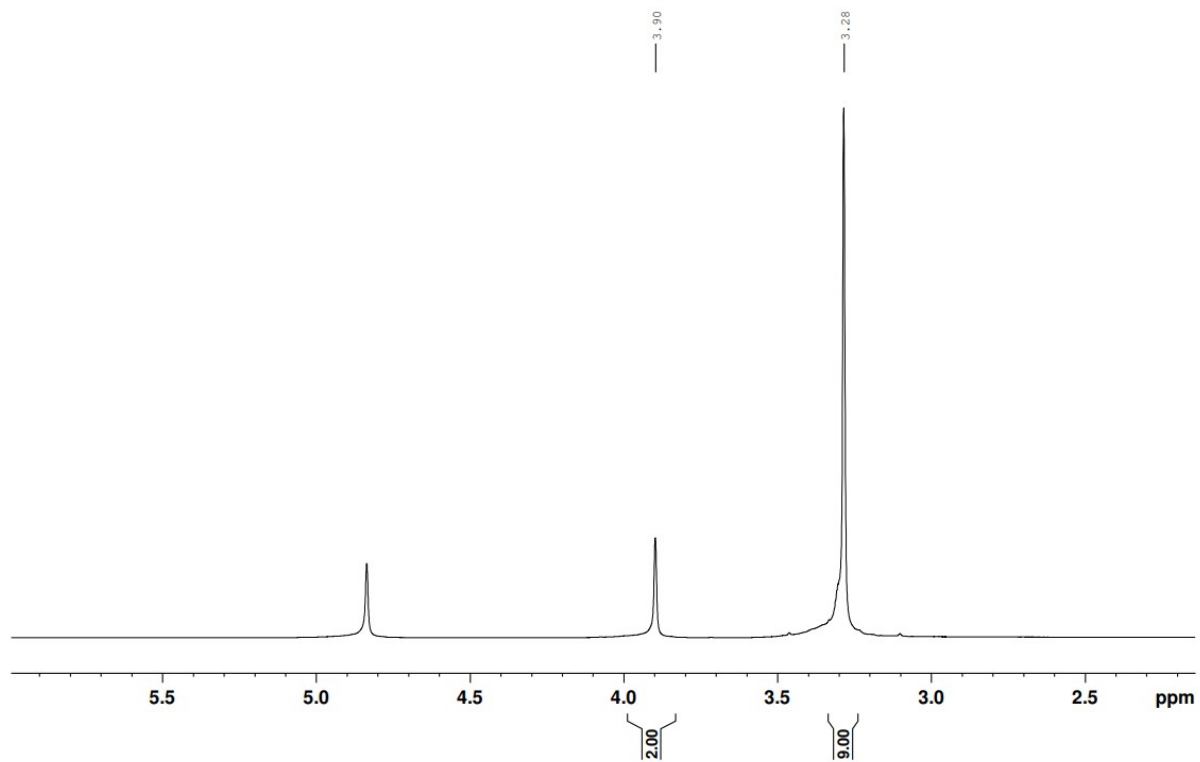

**Figure S9.**  $^1\text{H-NMR}$  spectrum of  $\text{Mg}[\text{Bet}]_3[\text{Tf}_2\text{N}]_2$  in  $\text{CD}_3\text{OD}$ .

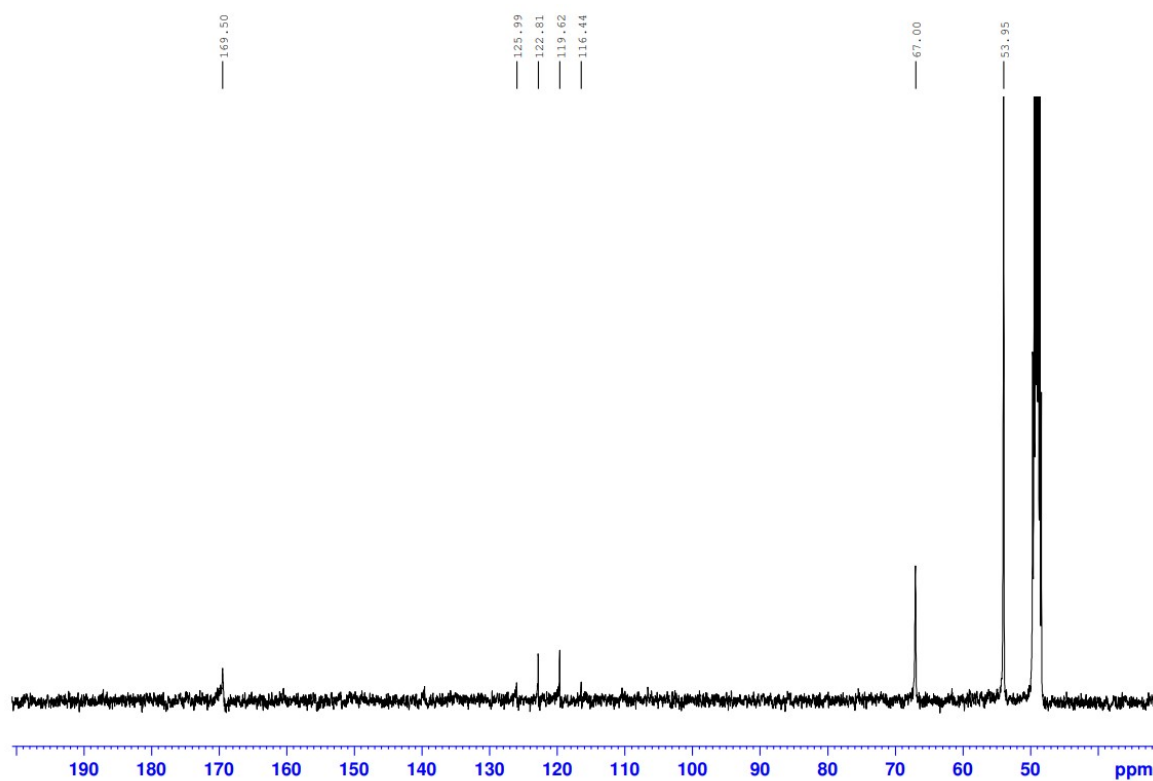

**Figure S10.**  $^{13}\text{C-NMR}$  spectrum of  $\text{Mg}[\text{Bet}]_3[\text{Tf}_2\text{N}]_2$  in  $\text{CD}_3\text{OD}$ .

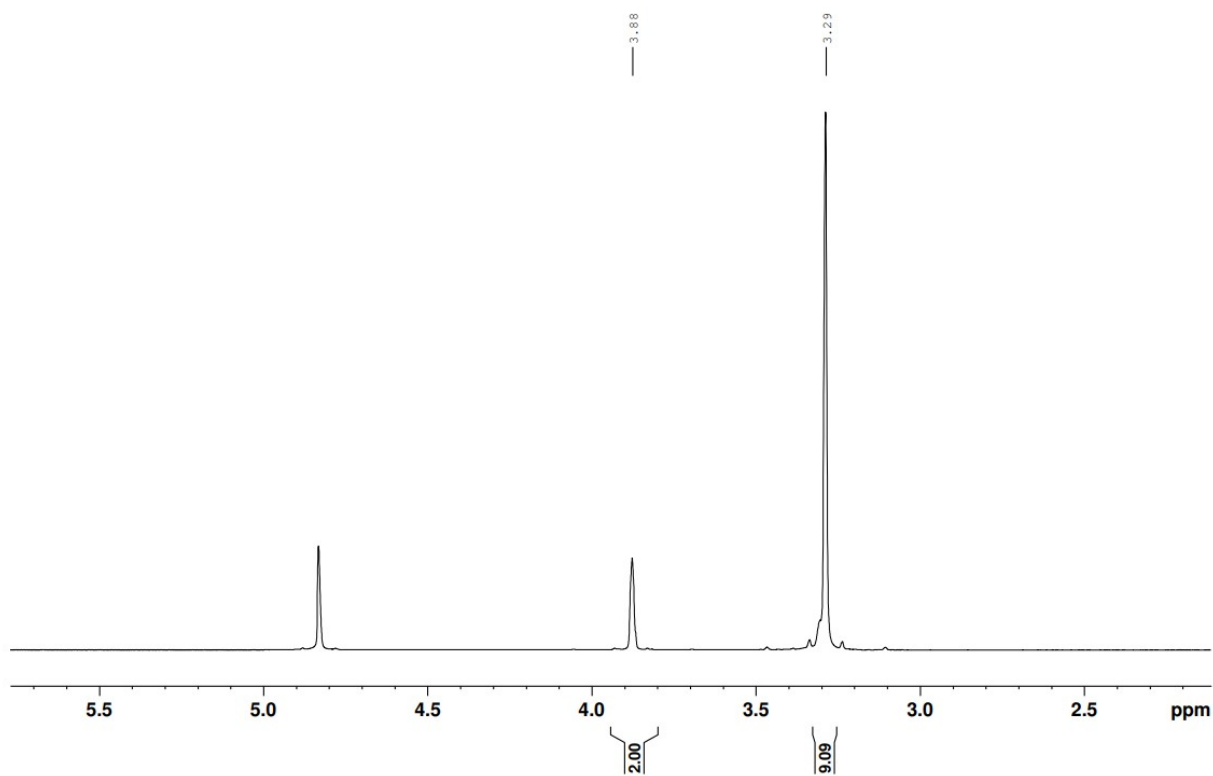

**Figure S11.**  $^1\text{H-NMR}$  spectrum of  $\text{Ca}[\text{Bet}]_3[\text{Tf}_2\text{N}]_2$  in  $\text{CD}_3\text{OD}$ .

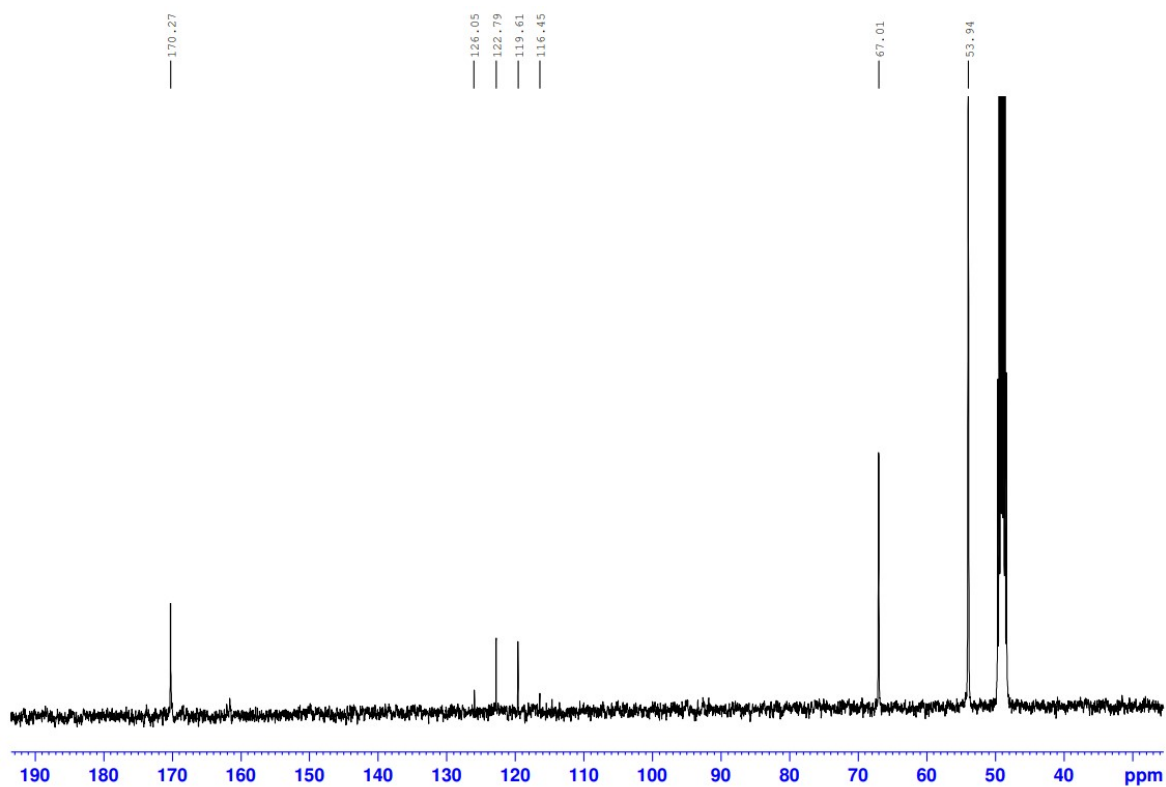

**Figure S12.**  $^{13}\text{C-NMR}$  spectrum of  $\text{Ca}[\text{Bet}]_3[\text{Tf}_2\text{N}]_2$  in  $\text{CD}_3\text{OD}$ .

|                                                                                    | <b>Ca[Bet]<sub>3</sub>[Tf<sub>2</sub>N]<sub>2</sub></b>                                         | <b>Cu<sub>2</sub>[Bet]<sub>4</sub>[Tf<sub>2</sub>N]<sub>4</sub></b>                                           |
|------------------------------------------------------------------------------------|-------------------------------------------------------------------------------------------------|---------------------------------------------------------------------------------------------------------------|
| <b>Crystal data</b>                                                                |                                                                                                 |                                                                                                               |
| Formula                                                                            | C <sub>19</sub> H <sub>33</sub> CaF <sub>12</sub> N <sub>5</sub> O <sub>14</sub> S <sub>4</sub> | C <sub>30</sub> H <sub>52</sub> Cu <sub>2</sub> F <sub>24</sub> N <sub>8</sub> O <sub>26</sub> S <sub>8</sub> |
| Molecular weight                                                                   | 951.82                                                                                          | 1780.38                                                                                                       |
| Size (mm <sup>3</sup> )                                                            | 0.05 × 0.05 × 0.250                                                                             | 0.29 × 0.24 × 0.20                                                                                            |
| Crystal system, space group                                                        | Triclinic, <i>P</i> -1 (No. 2)                                                                  | Orthorhombic, <i>Pccn</i> (No. 56)                                                                            |
| <i>a</i> (Å)                                                                       | 9.0322(2)                                                                                       | 21.4028(8)                                                                                                    |
| <i>b</i> (Å)                                                                       | 15.1177(4)                                                                                      | 22.6225(9)                                                                                                    |
| <i>c</i> (Å)                                                                       | 15.2478(4)                                                                                      | 13.9791(6)                                                                                                    |
| $\alpha$ (°)                                                                       | 105.4270(10)                                                                                    | 90                                                                                                            |
| $\beta$ (°)                                                                        | 105.0780(10)                                                                                    | 90                                                                                                            |
| $\gamma$ (°)                                                                       | 101.0740(10)                                                                                    | 90                                                                                                            |
| <i>V</i> (Å <sup>3</sup> )                                                         | 1860.00(8)                                                                                      | 6768.5(5)                                                                                                     |
| <i>Z</i>                                                                           | 2                                                                                               | 4                                                                                                             |
| <i>D</i> <sub>calc</sub> (g cm <sup>-3</sup> )                                     | 1.714                                                                                           | 1.747                                                                                                         |
| <b>Data collection and refinement</b>                                              |                                                                                                 |                                                                                                               |
| Radiation, $\lambda$ (Å)                                                           | MoK $\alpha$ , 0.71073                                                                          | MoK $\alpha$ , 0.71073                                                                                        |
| Temperature (K)                                                                    | 100                                                                                             | 100                                                                                                           |
| 2 $\theta$ <sub>max</sub> (°)                                                      | 56.55                                                                                           | 60.10                                                                                                         |
| $\mu$ (mm <sup>-1</sup> )                                                          | 0.519                                                                                           | 1.017                                                                                                         |
| Abs corr                                                                           | multi-scan                                                                                      | multi-scan                                                                                                    |
| <i>F</i> (000)                                                                     | 972.0                                                                                           | 3592                                                                                                          |
| no. of measured reflns                                                             | 52290                                                                                           | 107323                                                                                                        |
| no. of unique reflns                                                               | 9211                                                                                            | 9890                                                                                                          |
| no. of obsd reflns ( <i>I</i> <sub>0</sub> > 2 $\sigma$ ( <i>I</i> <sub>0</sub> )) | 8259                                                                                            | 8676                                                                                                          |
| <i>R</i> <sub>int</sub>                                                            | 0.0361                                                                                          | 0.0358                                                                                                        |
| <i>R</i> <sub><math>\sigma</math></sub>                                            | 0.025                                                                                           | 0.0177                                                                                                        |
| Range of <i>h, k, l</i>                                                            | -11 ≤ <i>h</i> ≤ 12<br>-20 ≤ <i>k</i> ≤ 20<br>-20 ≤ <i>l</i> ≤ 20                               | -29 ≤ <i>h</i> ≤ 30<br>-31 ≤ <i>k</i> ≤ 31<br>-19 ≤ <i>l</i> ≤ 19                                             |
| GOF on <i>F</i> <sup>2</sup>                                                       | 1.051                                                                                           | 1.003                                                                                                         |
| <i>R</i> <sub>1</sub>                                                              | 0.0324                                                                                          | 0.0308                                                                                                        |
| <i>R</i> <sub>1</sub> (all data)                                                   | 0.0362                                                                                          | 0.0365                                                                                                        |
| <i>wR</i> <sub>2</sub>                                                             | 0.0801                                                                                          | 0.0819                                                                                                        |
| <i>wR</i> <sub>2</sub> (all data)                                                  | 0.0826                                                                                          | 0.0860                                                                                                        |
| Maximum and minimum residual peak ( <i>e</i> Å <sup>-3</sup> )                     | +0.916<br>-0.471                                                                                | +0.86<br>-0.57                                                                                                |

**Table S1.** Crystallographic data for Calcium(II) and Copper(II) complexes



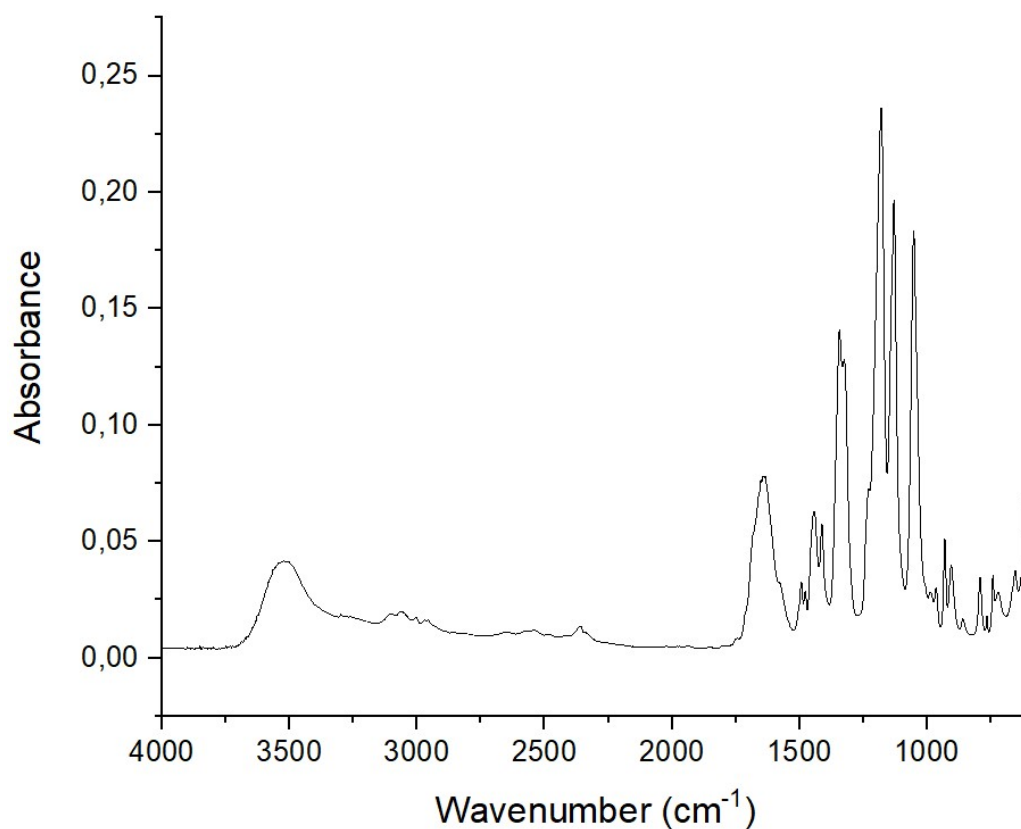

**Figure S13.** ATR-FTIR spectrum of  $\text{Mg}[\text{Bet}]_2[\text{Tf}_2\text{N}]_2$ .

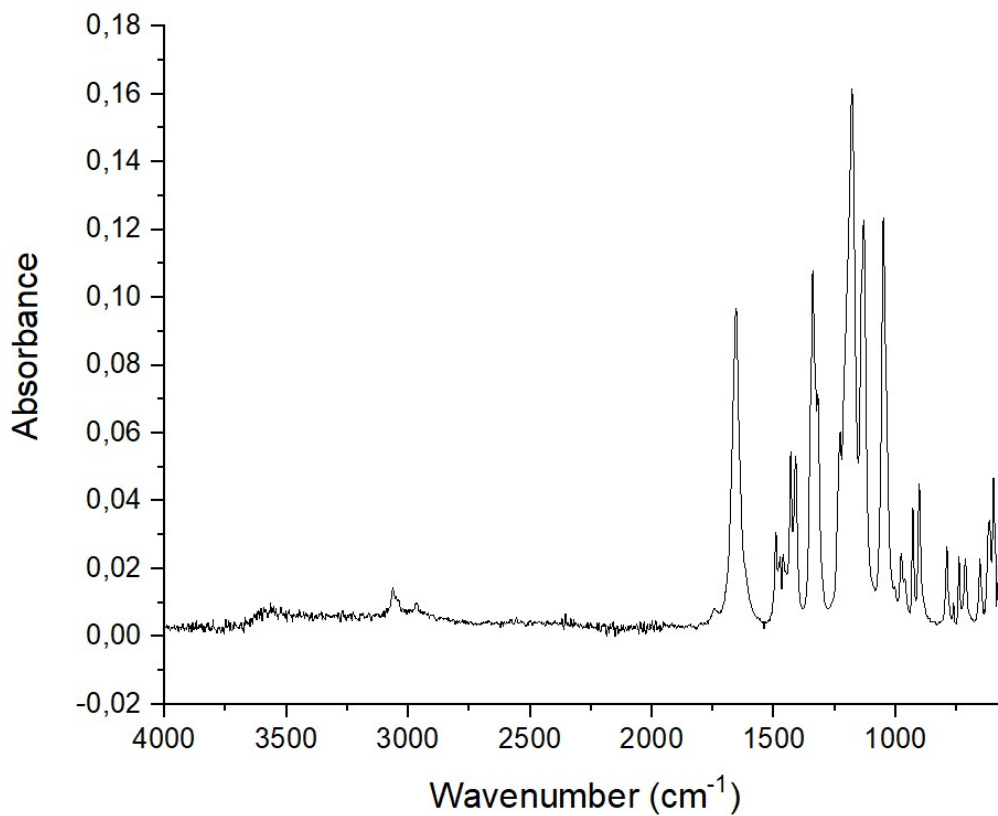

**Figure S14.** ATR-FTIR spectrum of  $\text{Mg}[\text{Bet}]_3[\text{Tf}_2\text{N}]_2$ .

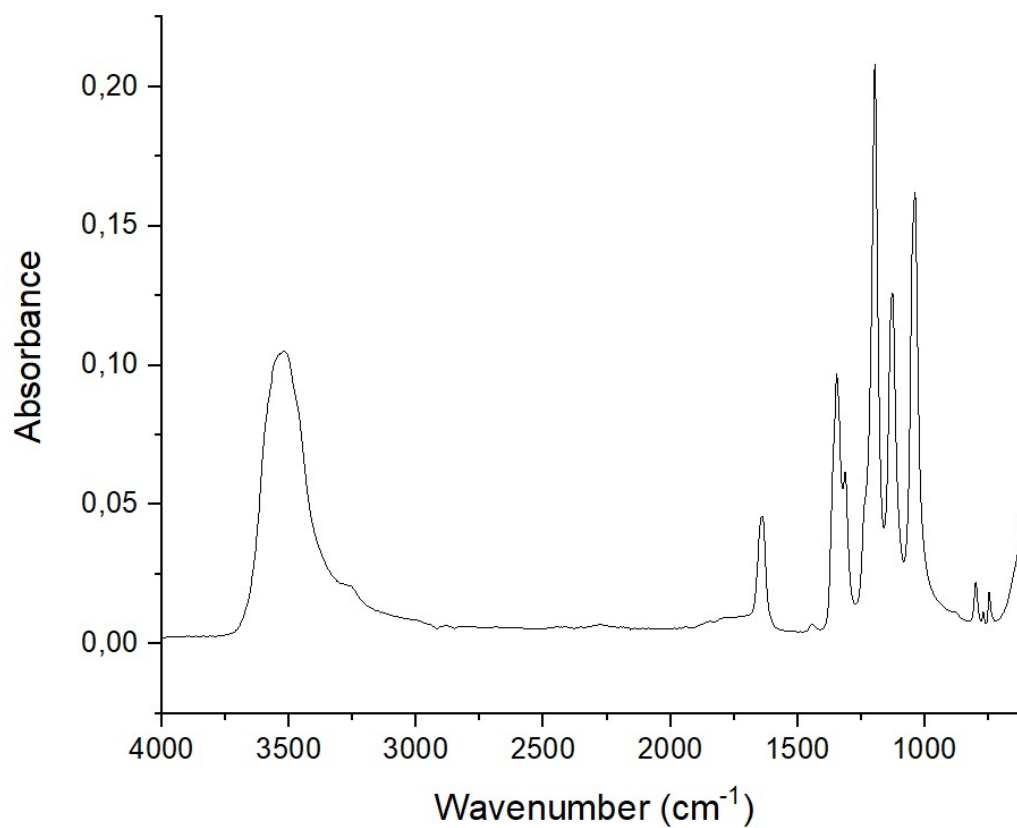

**Figure S15.** ATR-FTIR spectrum of Mg[Tf<sub>2</sub>N]<sub>2</sub>

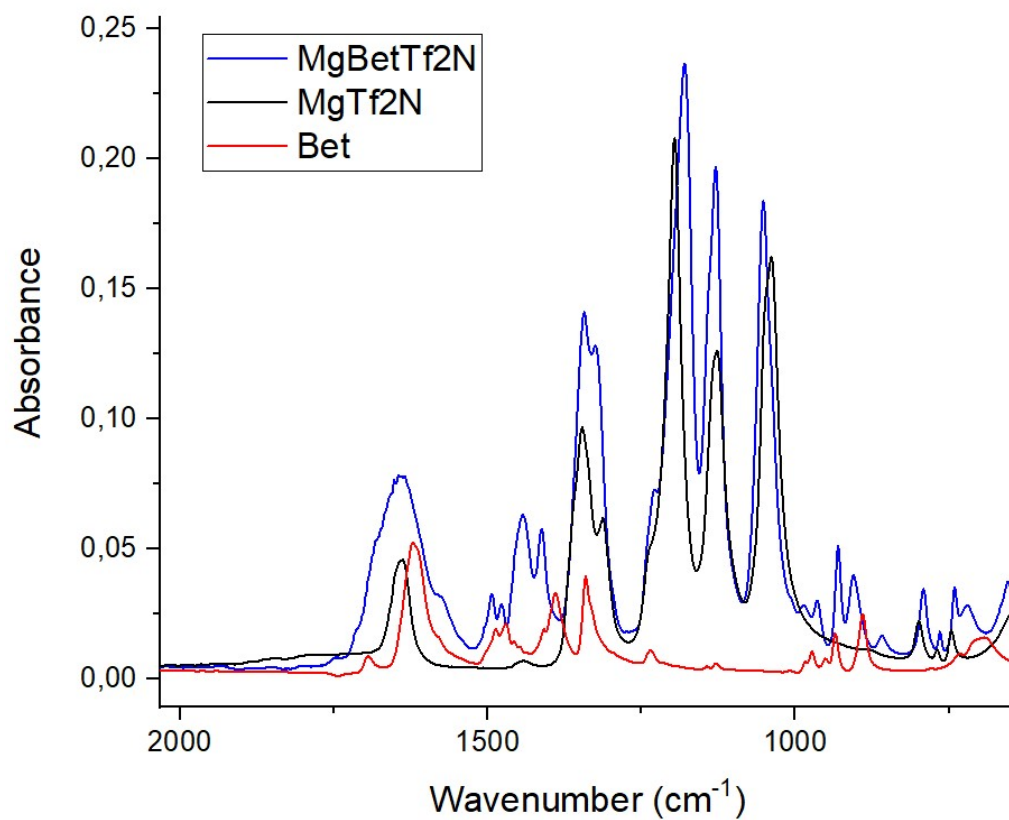

**Figure S16.** Comparison of ATR-FTIR spectra of Mg[Bet]<sub>2</sub>[Tf<sub>2</sub>N]<sub>2</sub>, Mg[Tf<sub>2</sub>N]<sub>2</sub> and betaine.

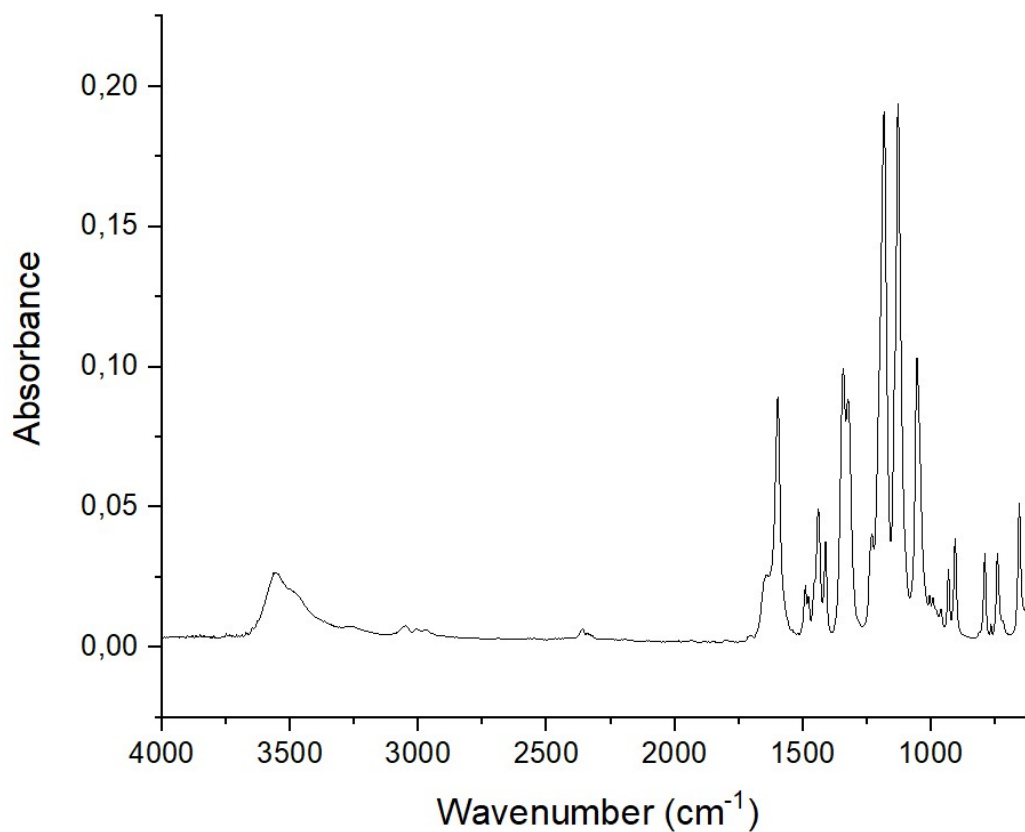

**Figure S17.** ATR-FTIR spectrum of Ca[Bet]<sub>2</sub>[Tf<sub>2</sub>N]<sub>2</sub>

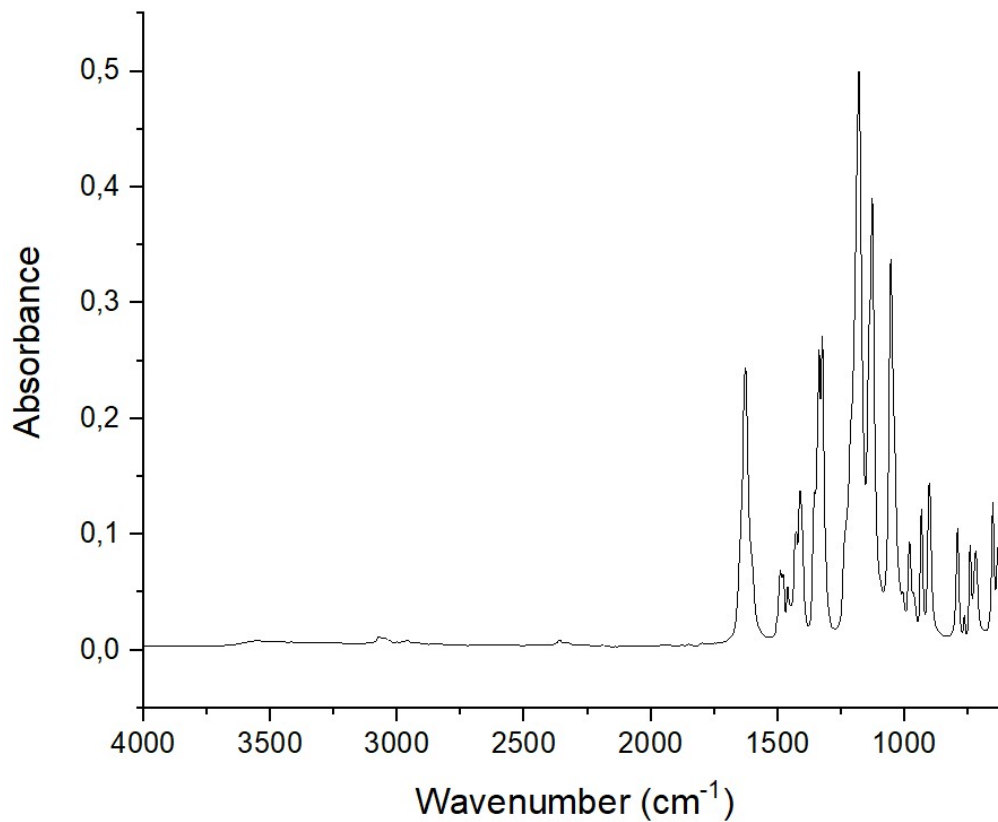

**Figure S18a.** ATR-FTIR spectrum of Ca[Bet]<sub>3</sub>[Tf<sub>2</sub>N]<sub>2</sub> (crystals)

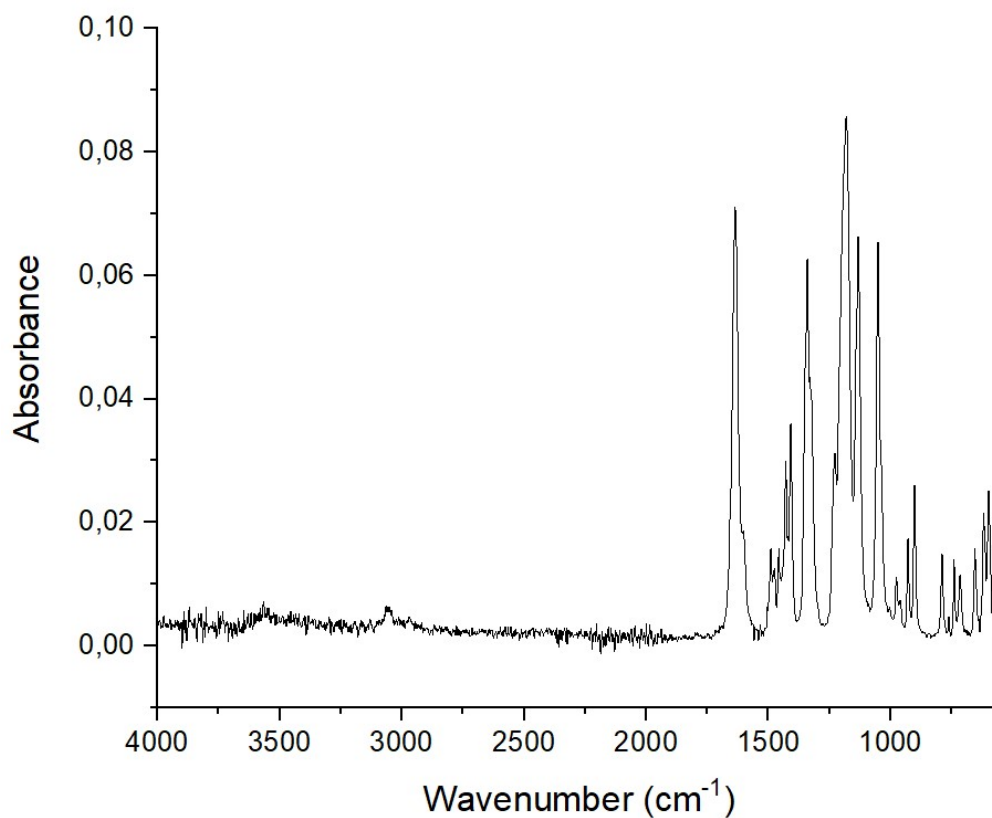

**Figure S18b.** ATR-FTIR spectrum of  $\text{Ca}[\text{Bet}]_3[\text{Tf}_2\text{N}]_2$  (synthesized).

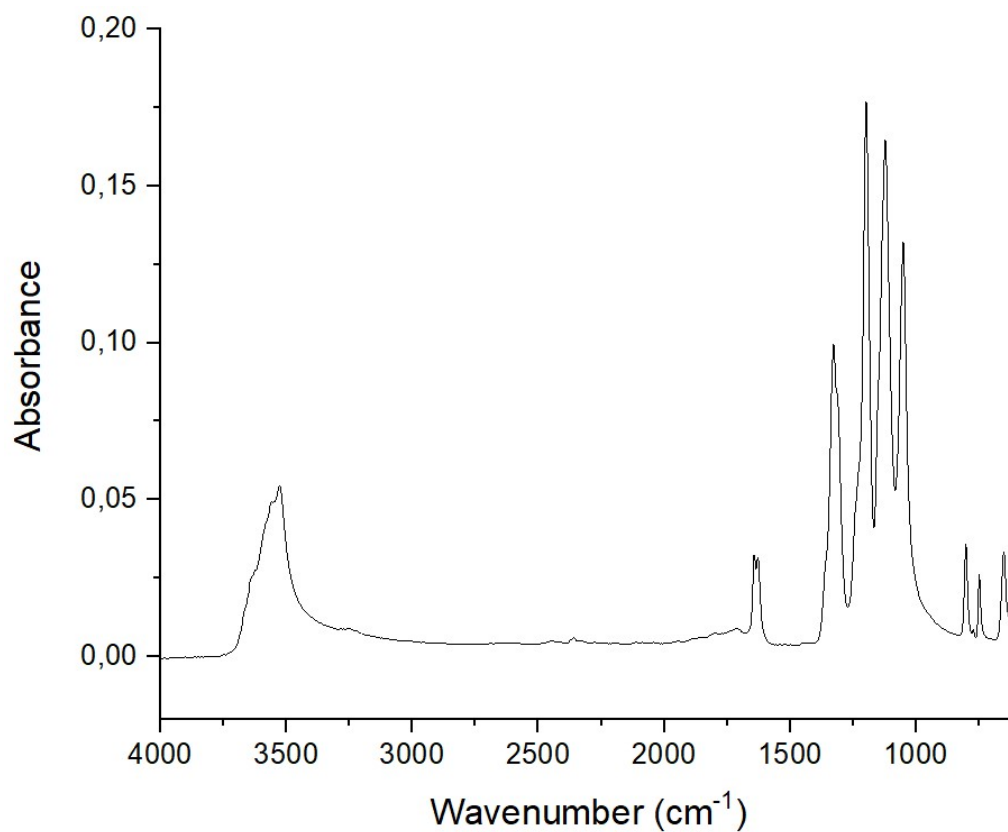

**Figure S19.** ATR-FTIR spectrum of  $\text{Ca}[\text{Tf}_2\text{N}]_2$

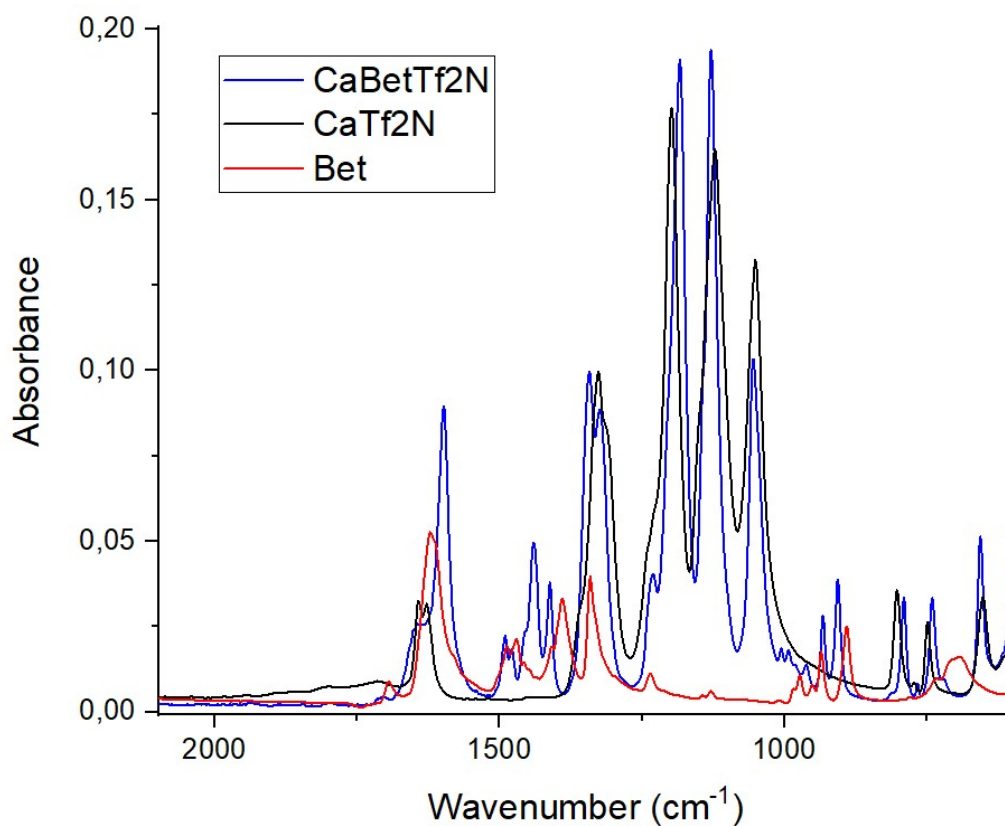

**Figure S20.** Comparison of ATR-FTIR spectra of  $\text{Ca}[\text{Bet}]_2[\text{Tf}_2\text{N}]_2$ ,  $\text{Ca}[\text{Tf}_2\text{N}]_2$  and betaine.

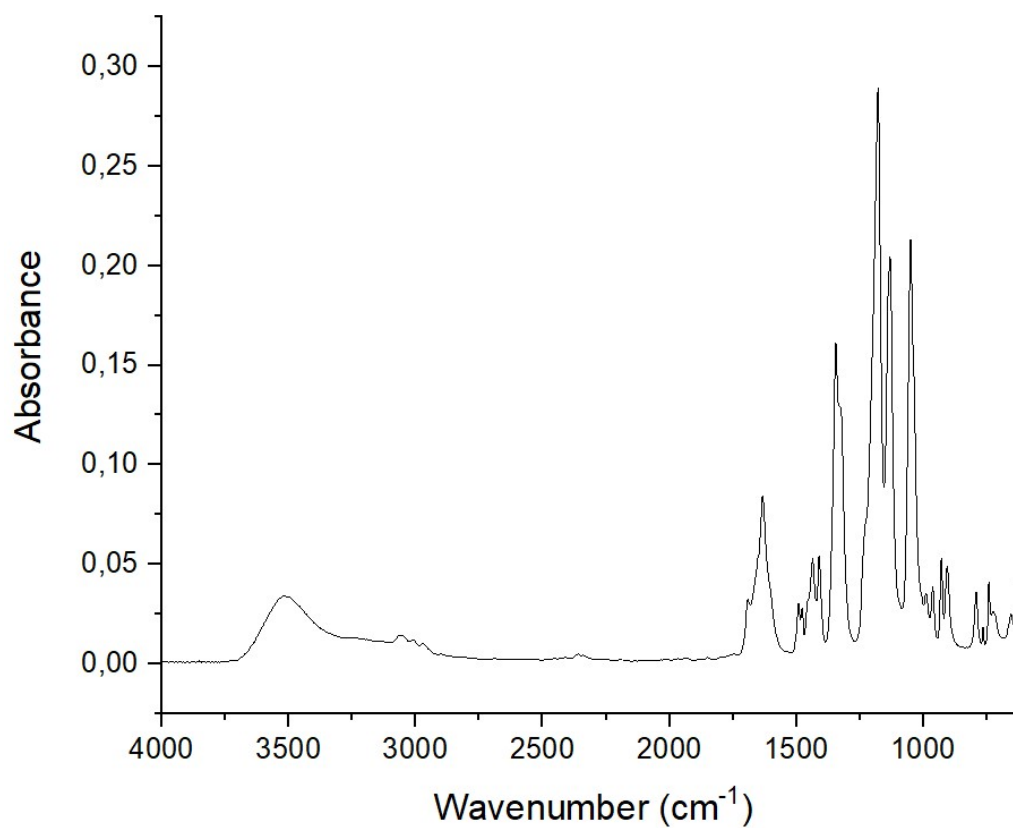

**Figure S21.** ATR-FTIR spectrum of  $\text{Zn}[\text{Bet}]_2[\text{Tf}_2\text{N}]_2$

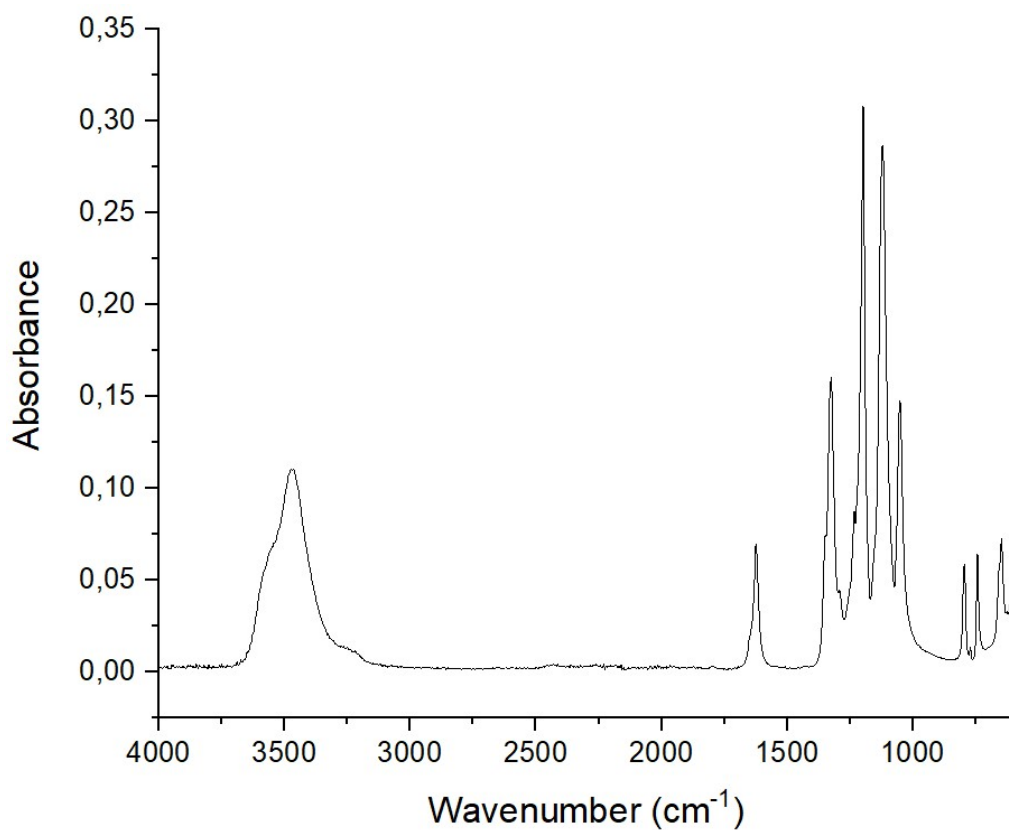

**Figure S22.** ATR-FTIR spectrum of Zn[Tf<sub>2</sub>N]<sub>2</sub>

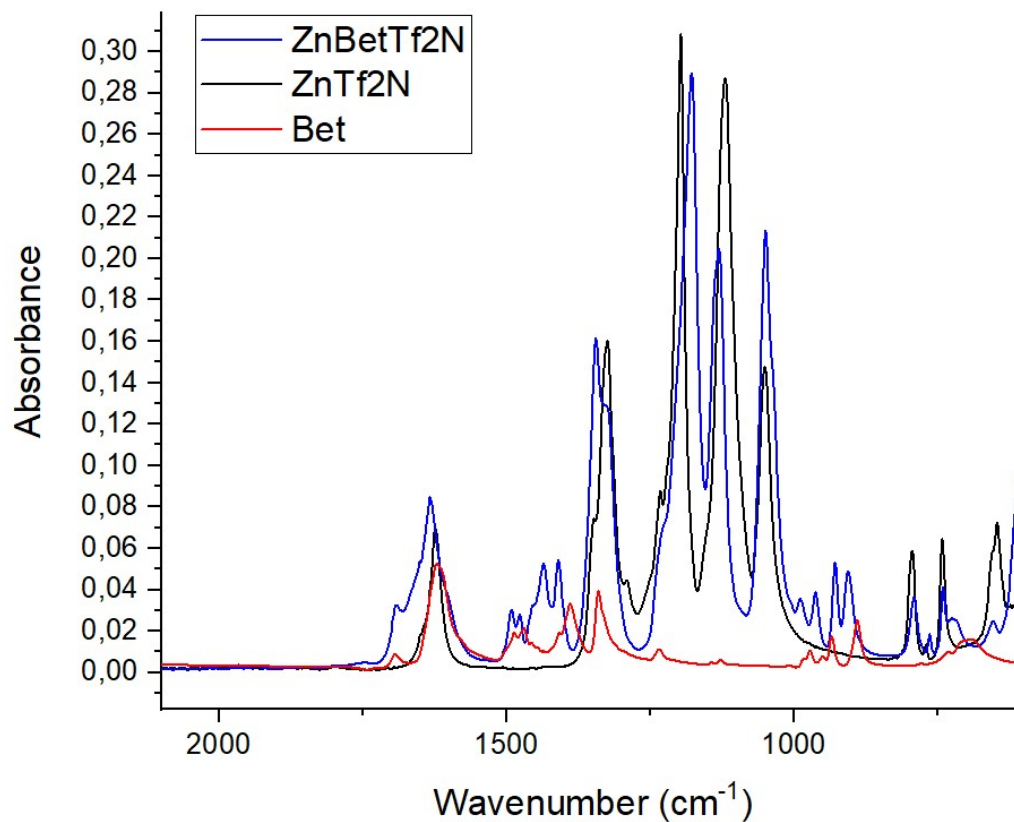

**Figure S23.** Comparison of ATR-FTIR spectra of Zn[Bet]<sub>2</sub>[Tf<sub>2</sub>N]<sub>2</sub>, Zn[Tf<sub>2</sub>N]<sub>2</sub> and betaine.

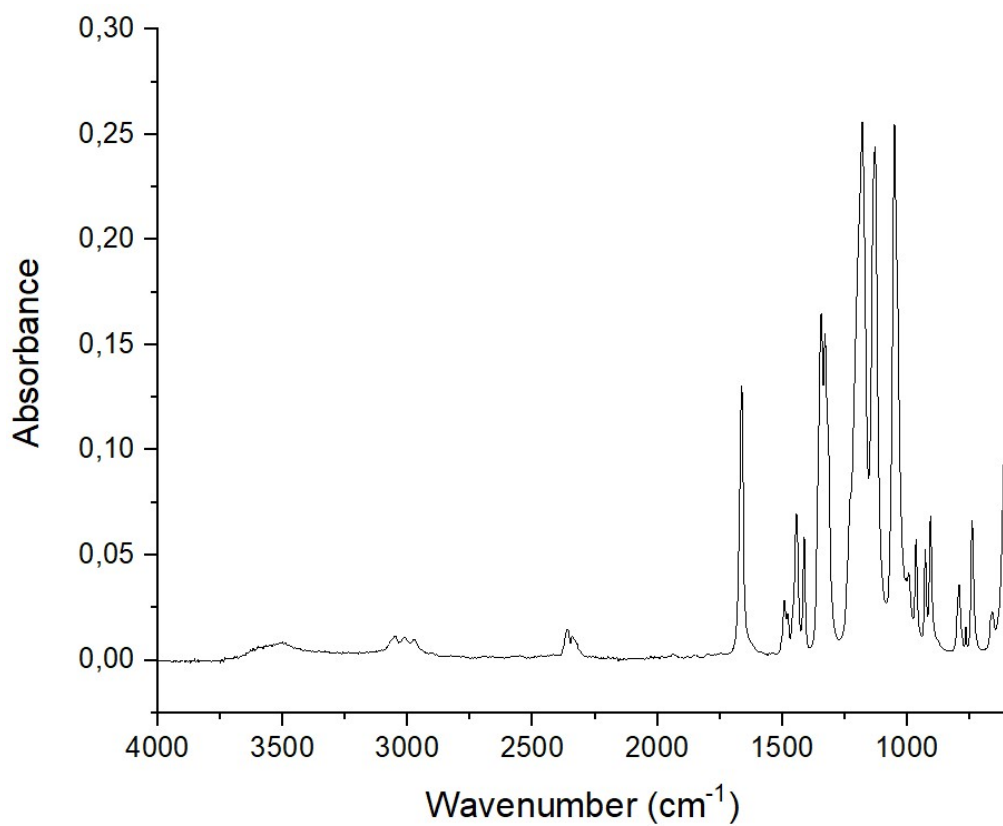

**Figure S24.** ATR-FTIR spectrum of  $\text{Cu[Bet]}_2[\text{Tf}_2\text{N}]_2$ .

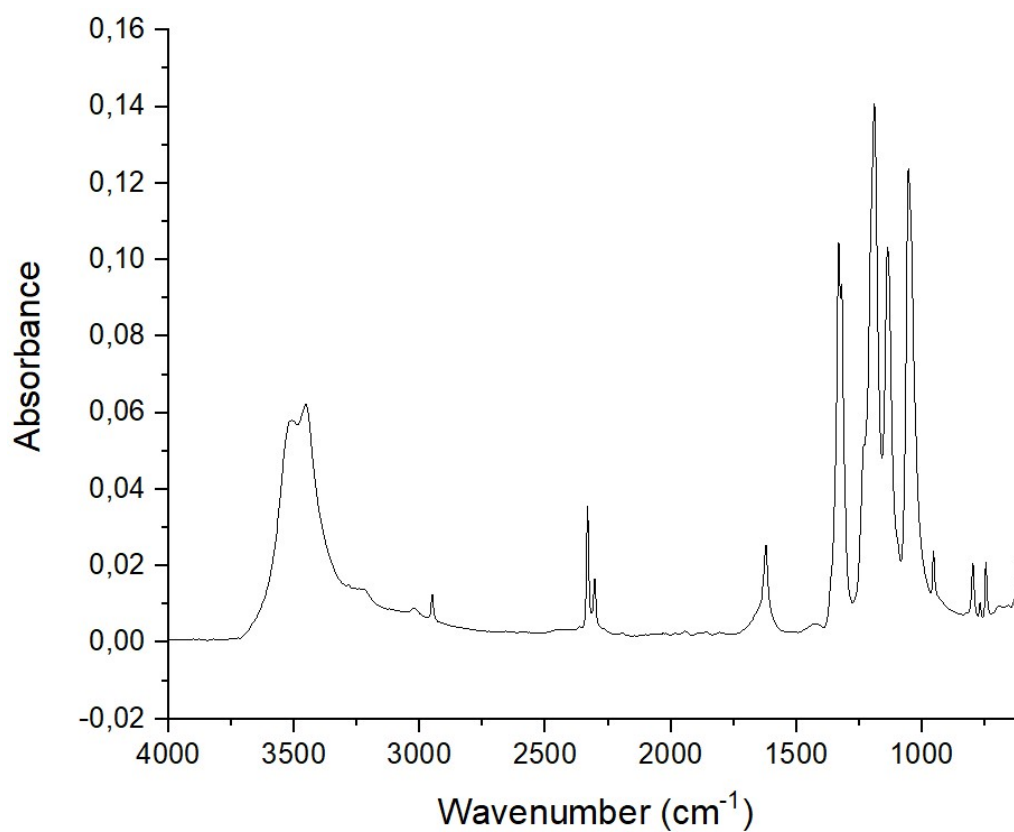

**Figure S25.** ATR-FTIR spectrum of  $\text{Cu}[\text{Tf}_2\text{N}]_2$ .

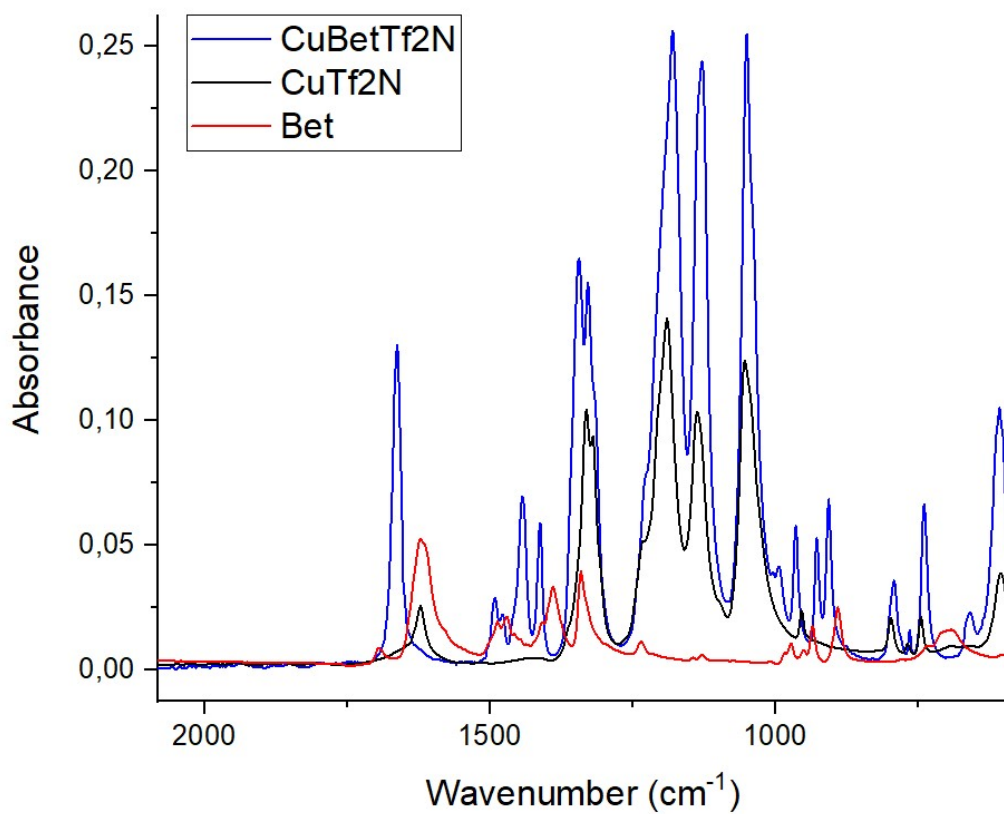

**Figure S26.** Comparison of ATR-FTIR spectra of  $\text{Cu}[\text{Bet}]_2[\text{Tf}_2\text{N}]_2$ ,  $\text{Cu}[\text{Tf}_2\text{N}]_2$  and betaine.

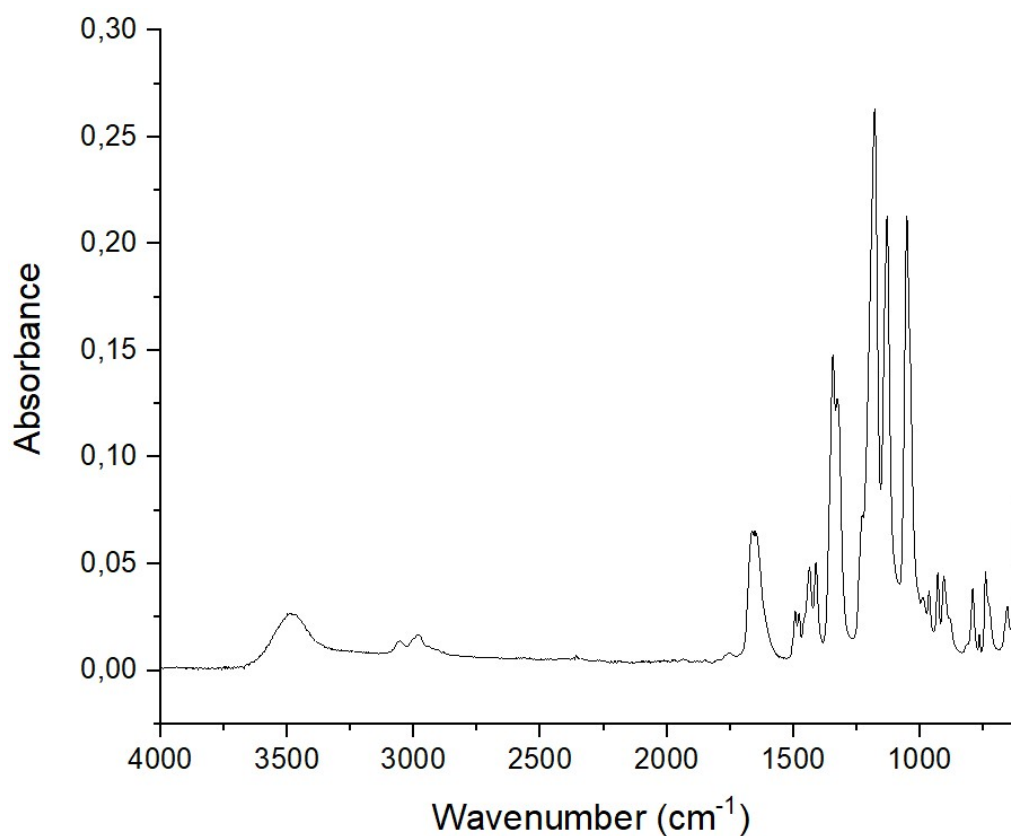

**Figure S27.** ATR-FTIR spectrum of  $\text{Ni}[\text{Bet}]_2[\text{Tf}_2\text{N}]_2$ .



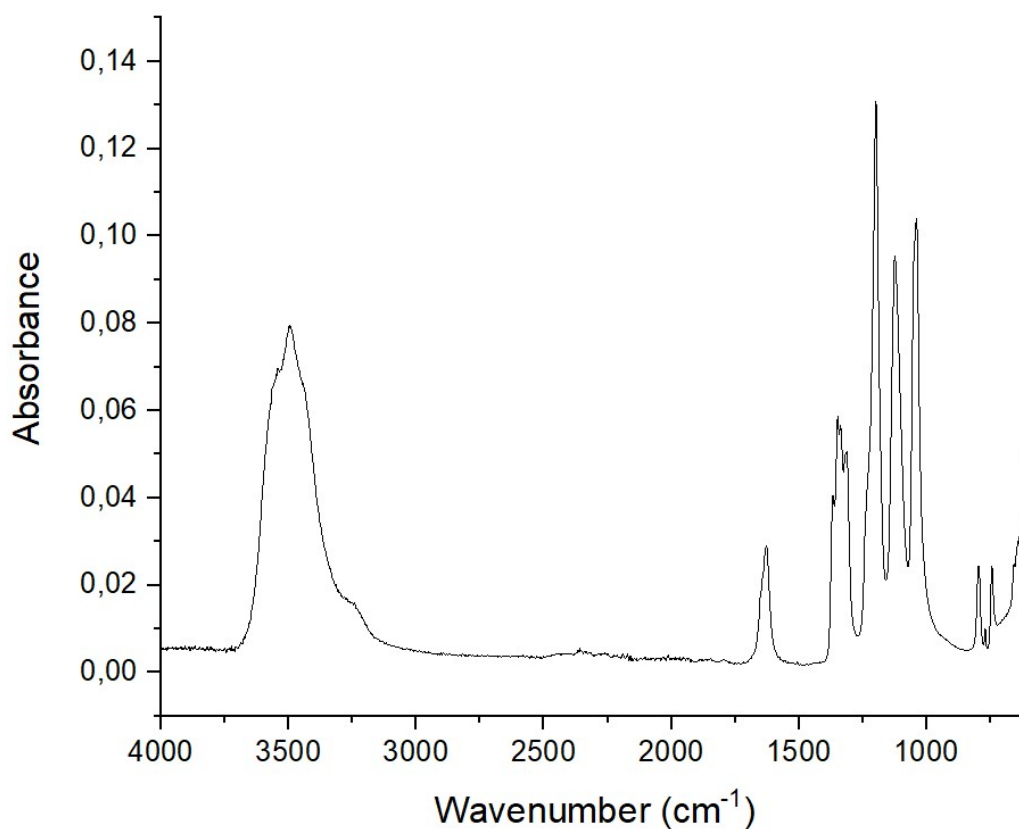

**Figure S28.** ATR-FTIR spectrum of Ni[Tf<sub>2</sub>N]<sub>2</sub>.

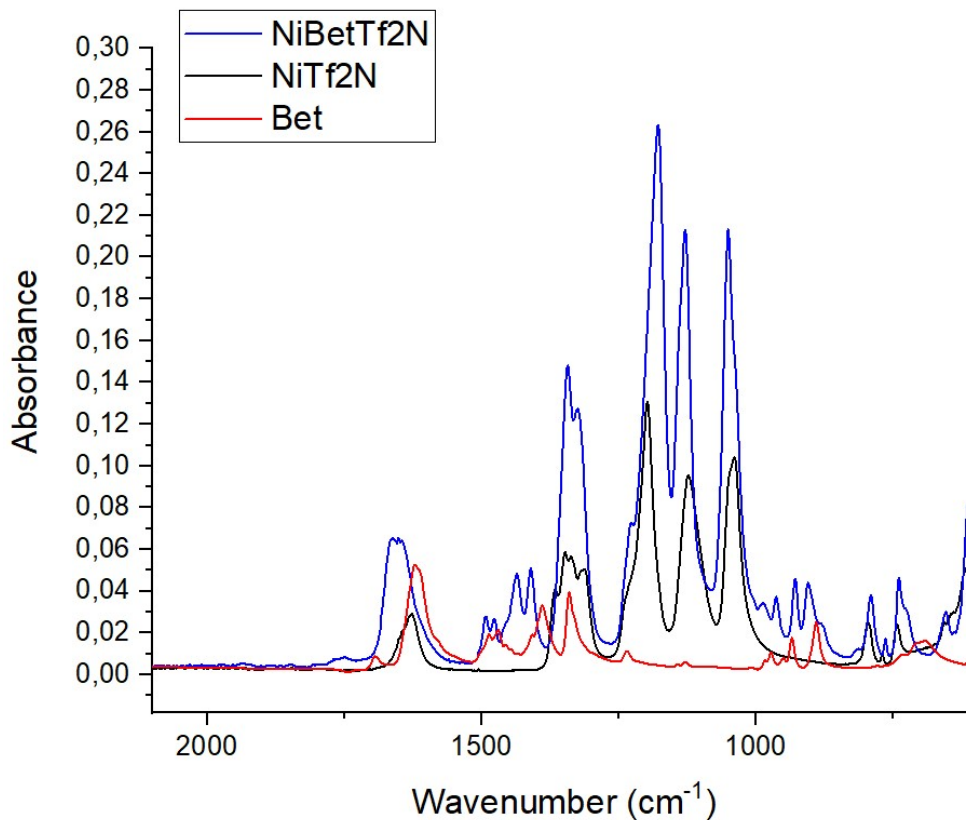

**Figure S29.** Comparison of ATR-FTIR spectra of Cu[Bet]<sub>2</sub>[Tf<sub>2</sub>N]<sub>2</sub>, Cu[Tf<sub>2</sub>N]<sub>2</sub> and betaine.

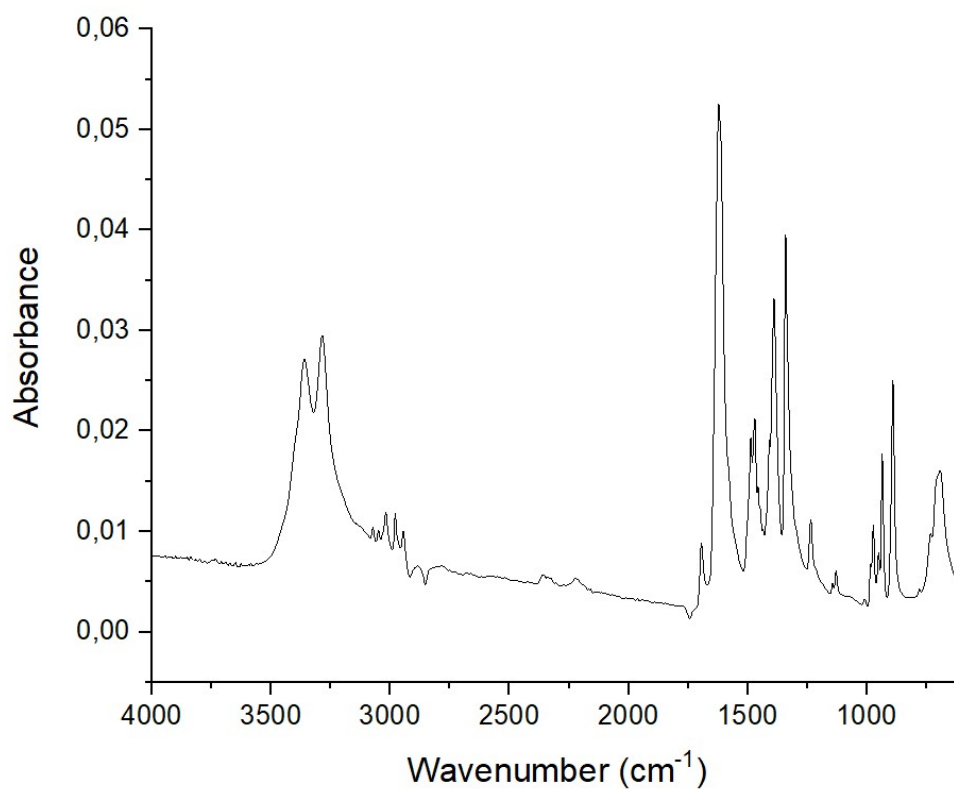

**Figure S30.** ATR-FTIR spectrum of betaine.

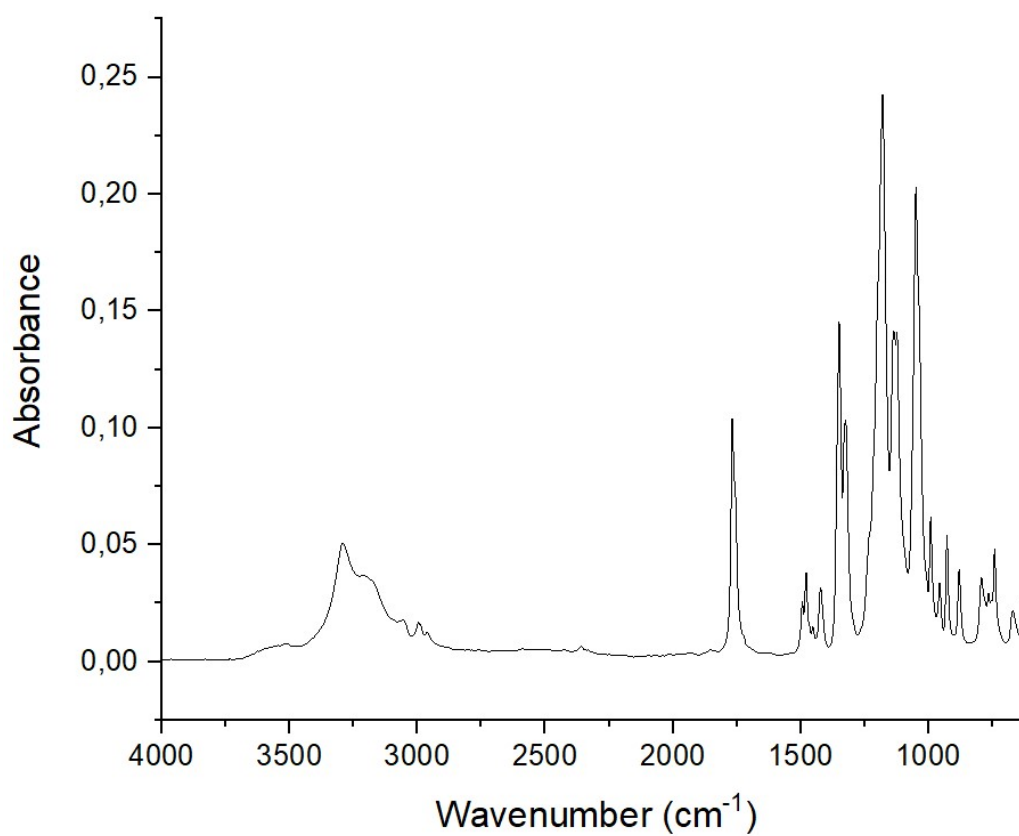

**Figure S31.** ATR-FTIR spectrum of H[Bet][Tf<sub>2</sub>N].

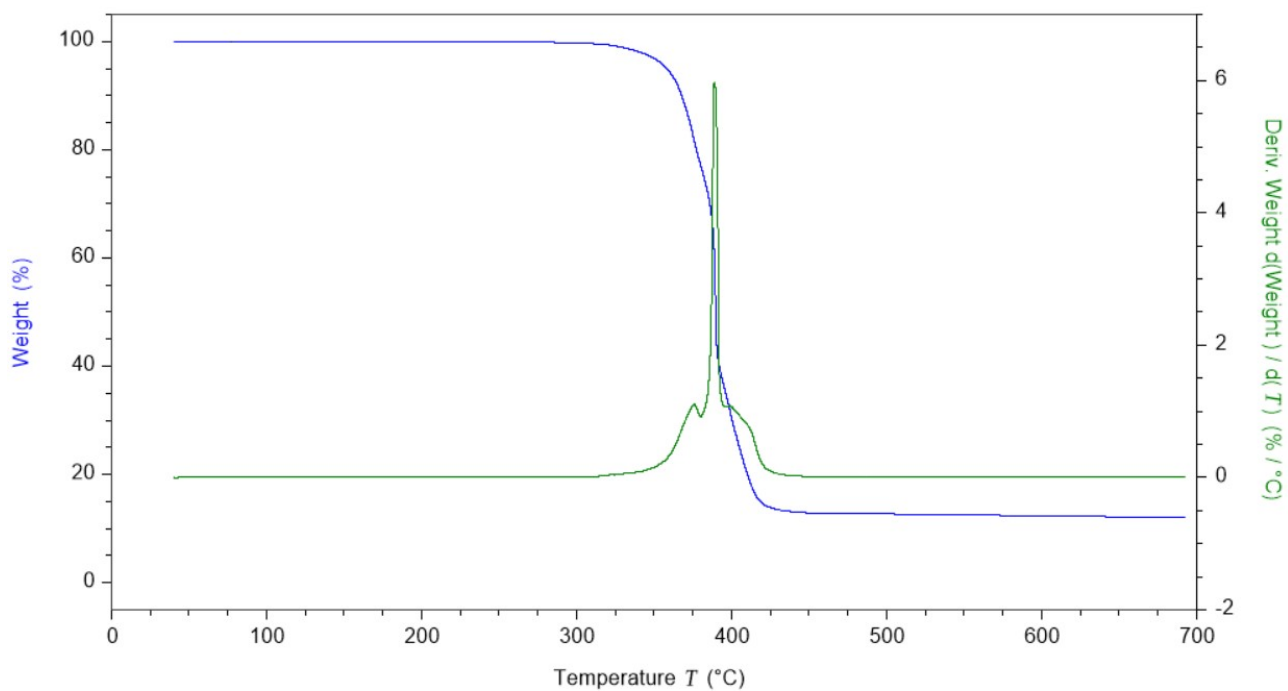

**Figure S32.** Thermogravimetric analysis of  $\text{Mg[Bet]}_2[\text{Tf}_2\text{N}]_2$ .

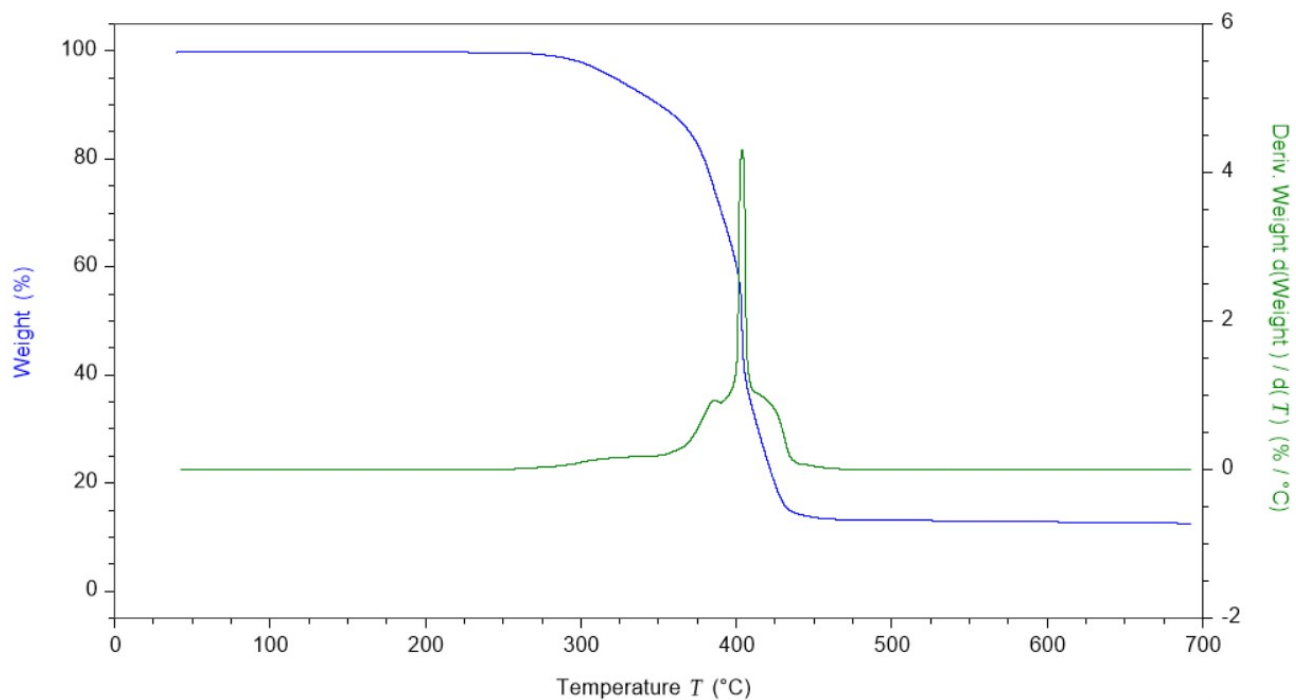

**Figure S33.** TGA thermogram of  $\text{Mg[Bet]}_3[\text{Tf}_2\text{N}]_2$ .

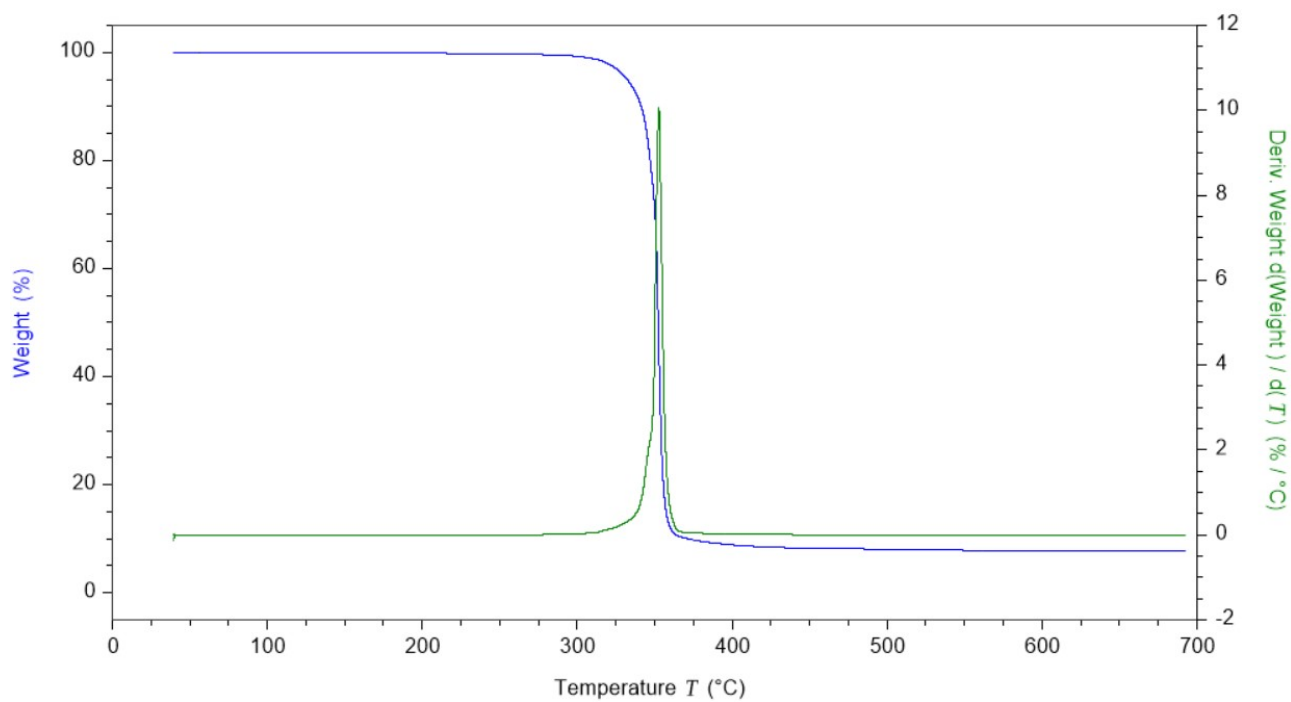

**Figure S34.** Thermogravimetric analysis of  $\text{Mg}[\text{Tf}_2\text{N}]_2$ .

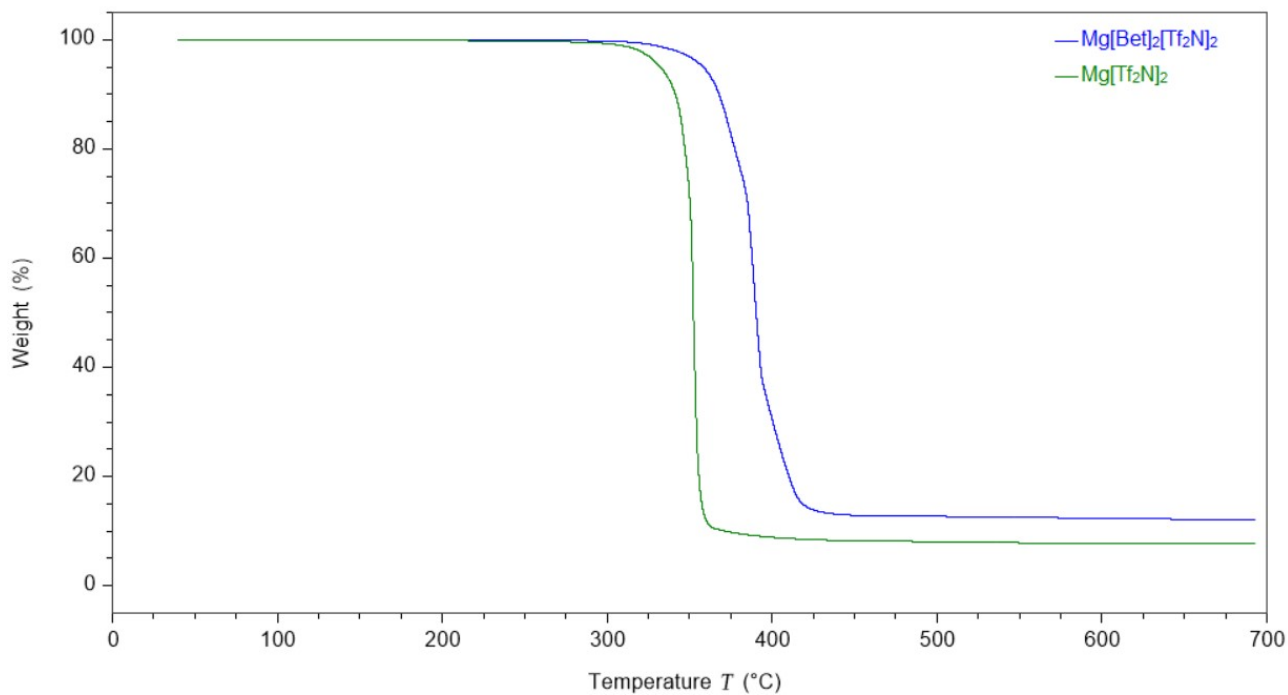

**Figure S35.** Comparison of thermogravimetric analysis of  $\text{Mg}[\text{Bet}]_2[\text{Tf}_2\text{N}]_2$  and  $\text{Mg}[\text{Tf}_2\text{N}]_2$ .

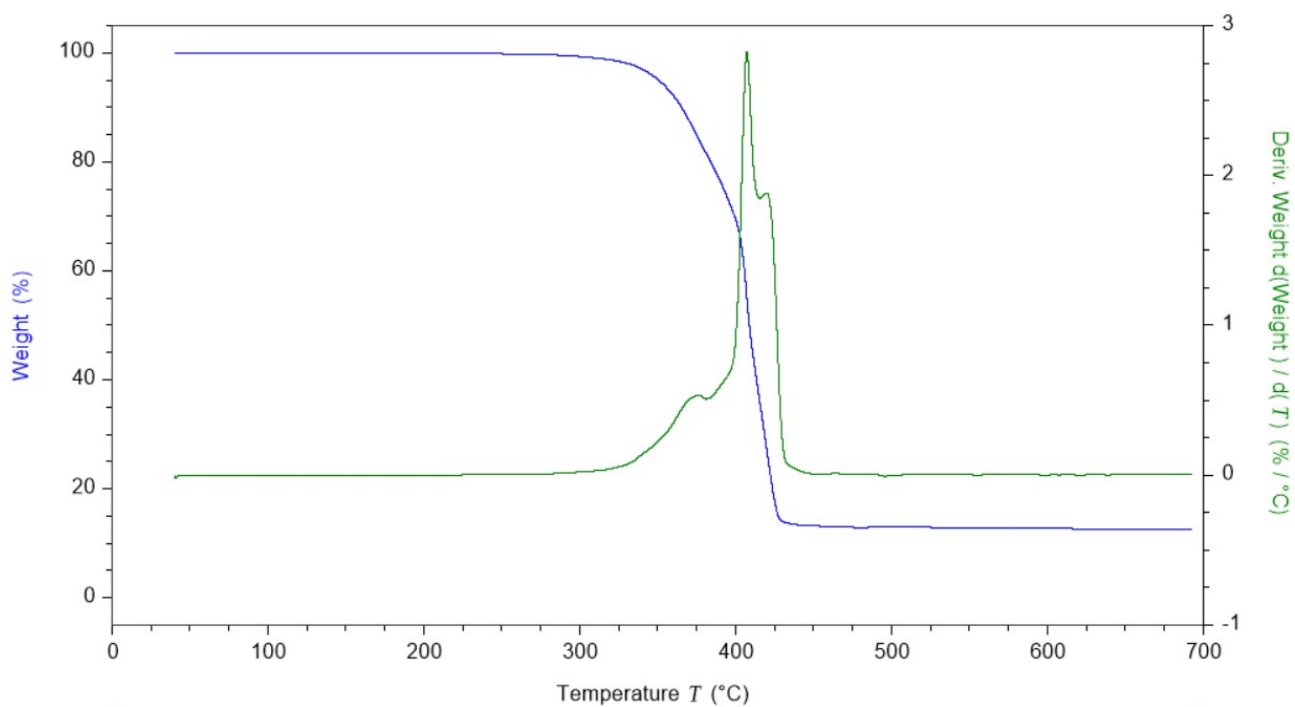

**Figure S36.** Thermogravimetric analysis of  $\text{Ca}[\text{Bet}]_2[\text{Tf}_2\text{N}]_2$ .

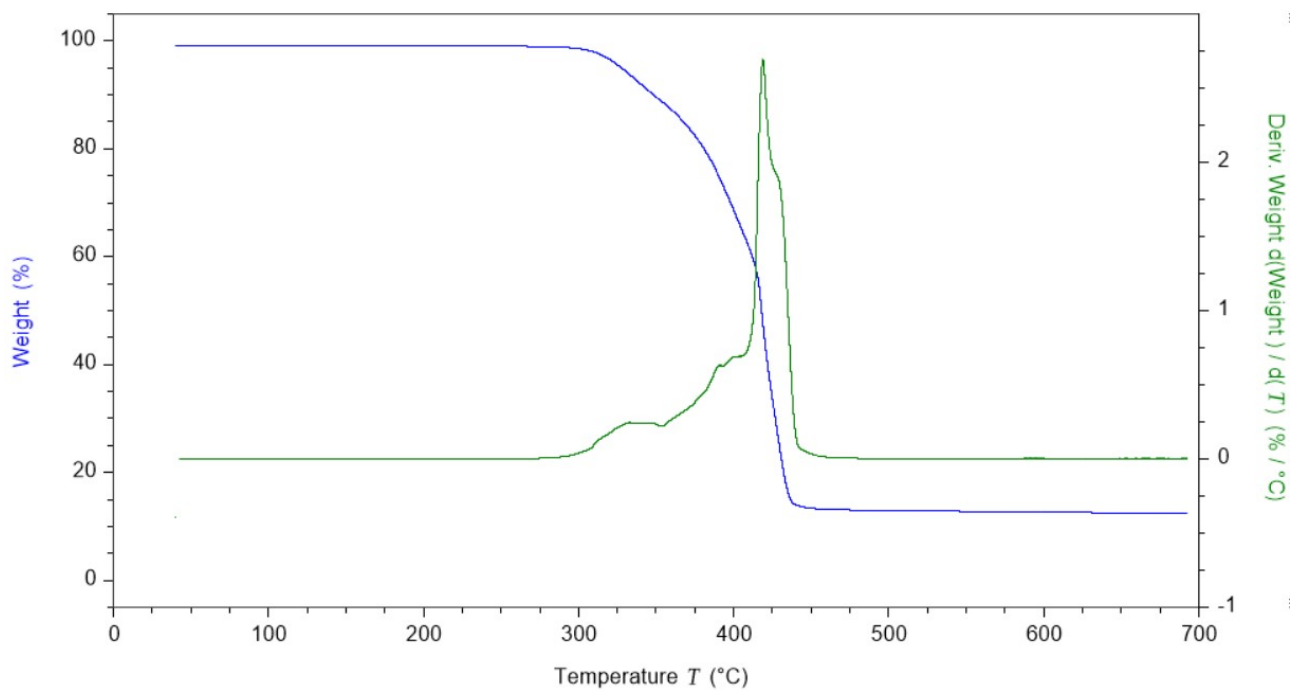

**Figure S37.** TGA thermogram of  $\text{Ca}[\text{Bet}]_3[\text{Tf}_2\text{N}]_2$  (synthesized).

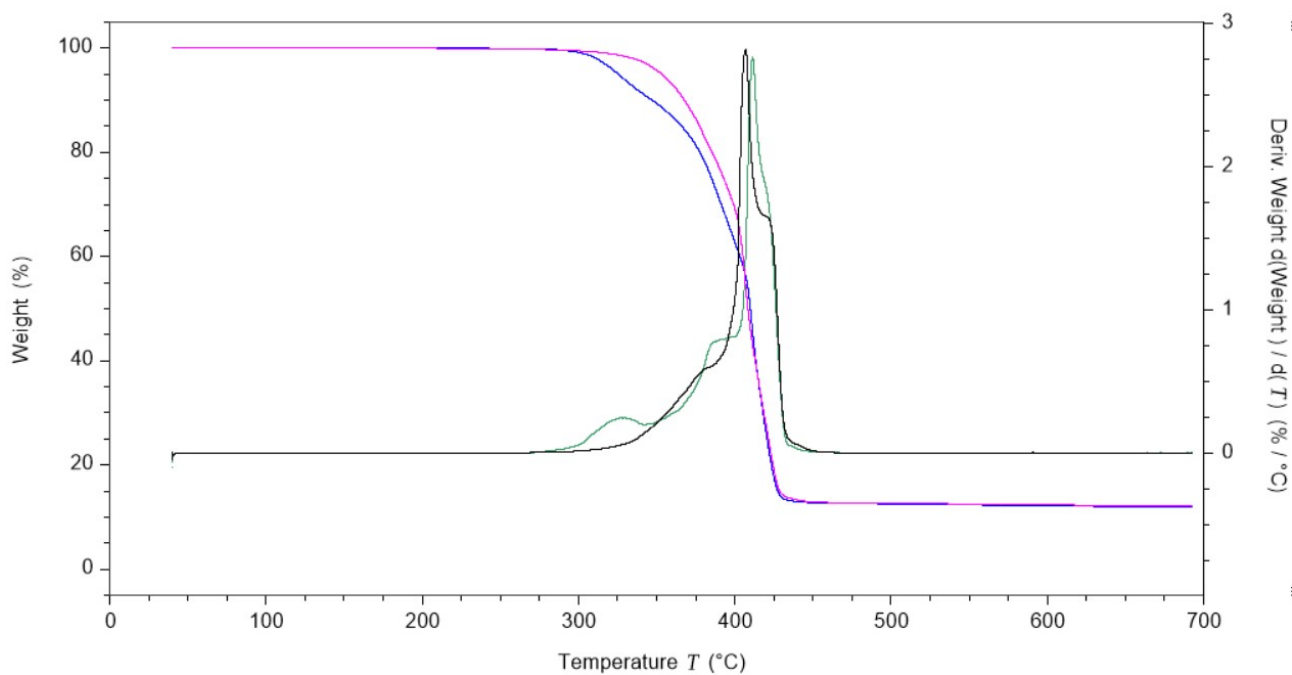

**Figure S38.** Thermogravimetric analysis of  $\text{Ca}[\text{Bet}]_3[\text{Tf}_2\text{N}]_2$  crystals (blue and green curves) compared with the thermogravimetric analysis of  $\text{Ca}[\text{Bet}]_2[\text{Tf}_2\text{N}]_2$  (violet and black curves).

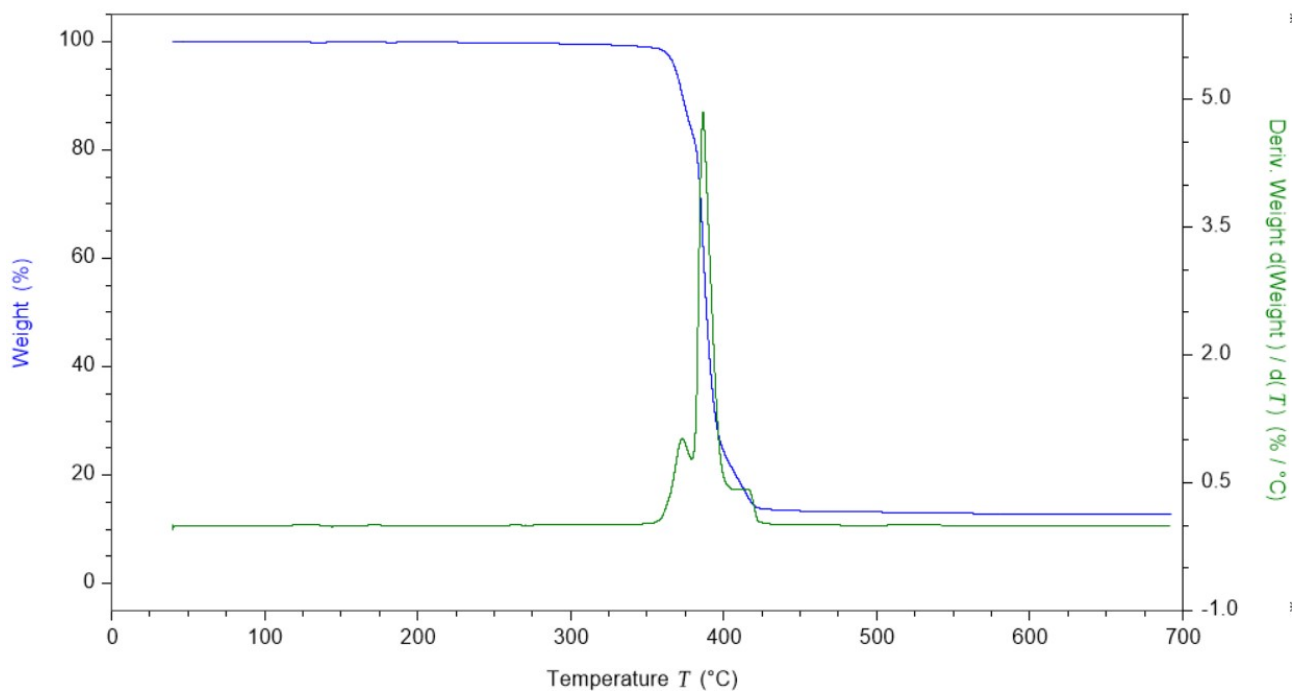

**Figure S39.** Thermogravimetric analysis of  $\text{Ca}[\text{Tf}_2\text{N}]_2$ .

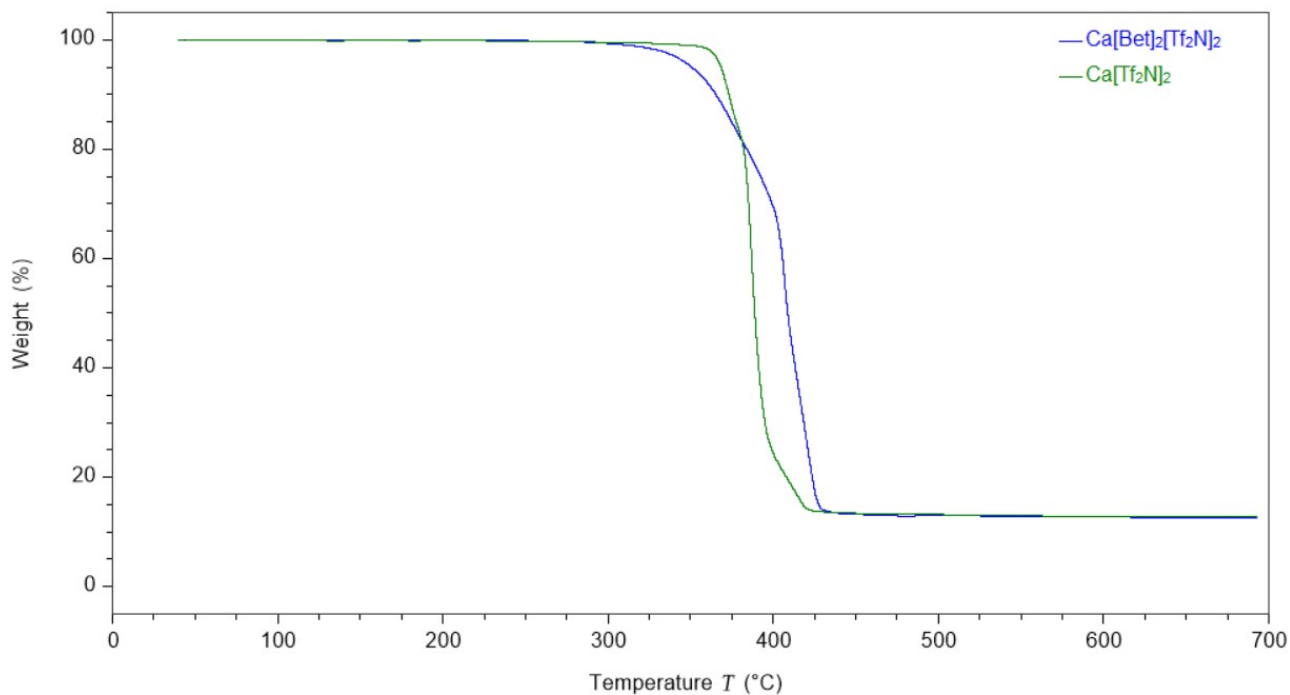

**Figure S40.** Comparison of thermogravimetric analysis of  $\text{Mg}[\text{Bet}]_2[\text{Tf}_2\text{N}]_2$  and  $\text{Mg}[\text{Tf}_2\text{N}]_2$ .

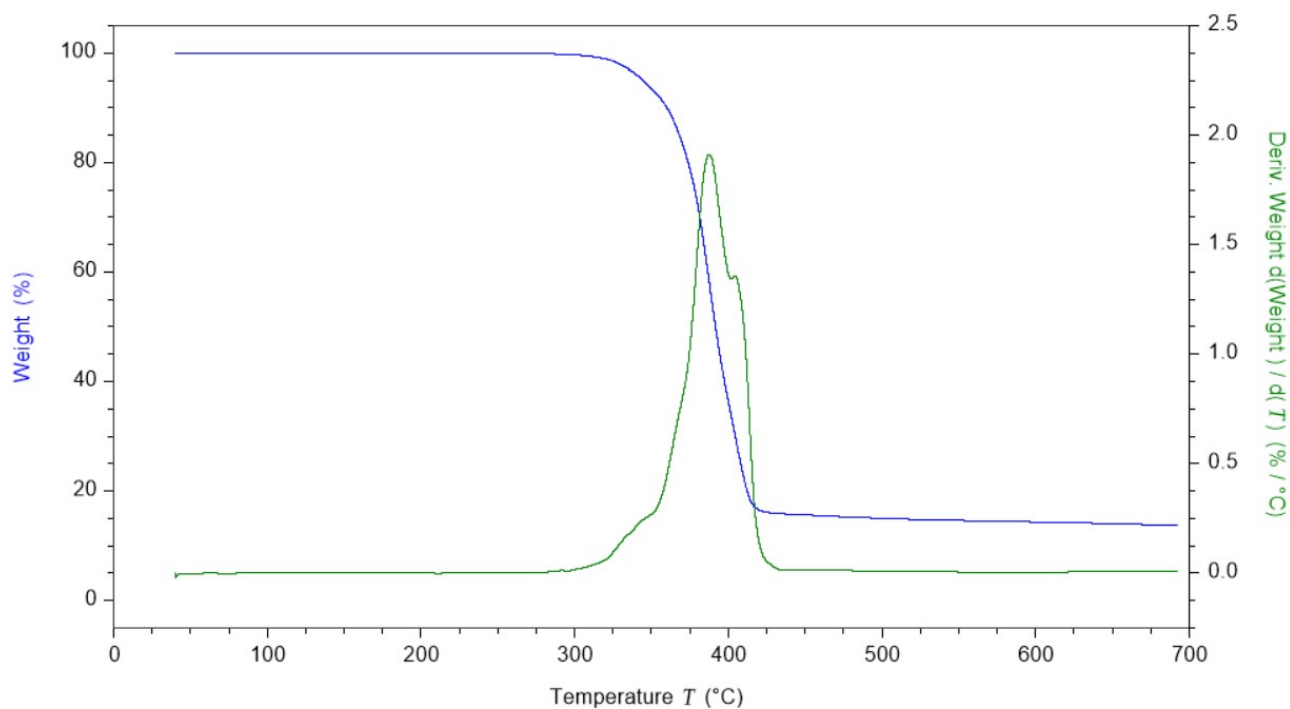

**Figure S41.** Thermogravimetric analysis of  $\text{Zn}[\text{Bet}]_2[\text{Tf}_2\text{N}]_2$ .

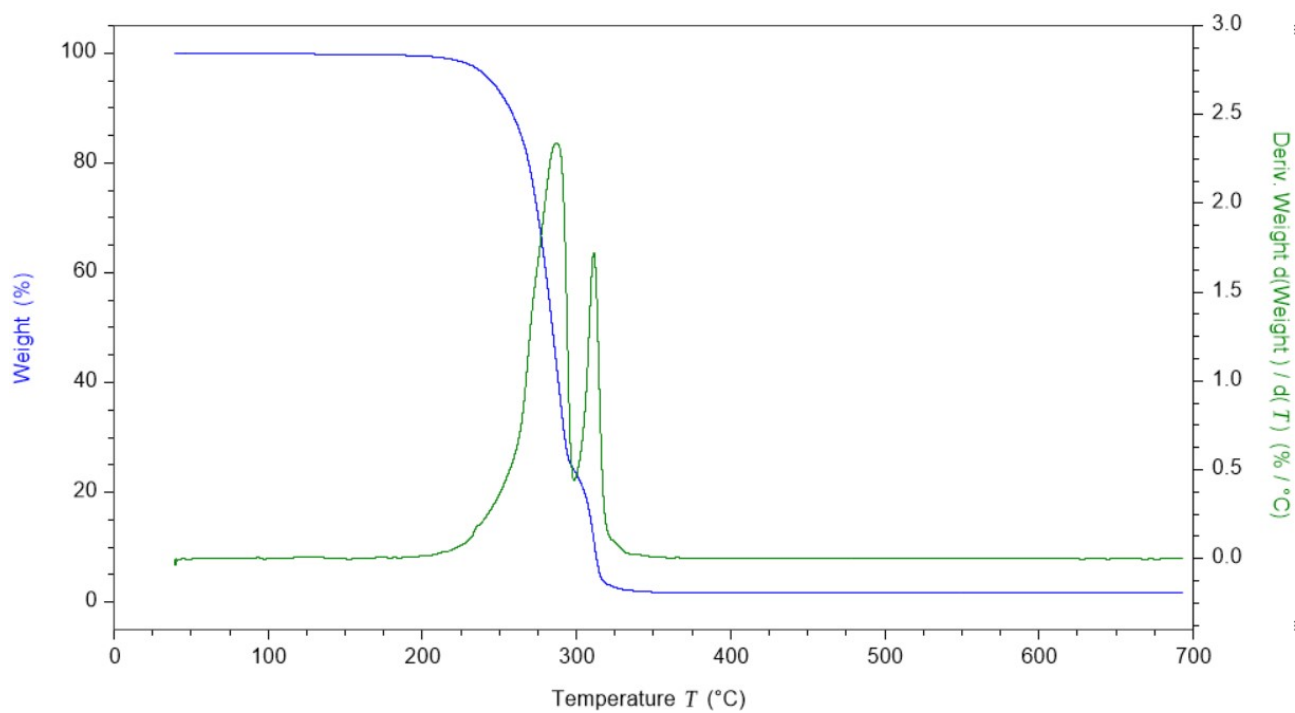

**Figure S42.** Thermogravimetric analysis of  $\text{Zn}[\text{Tf}_2\text{N}]_2$ .

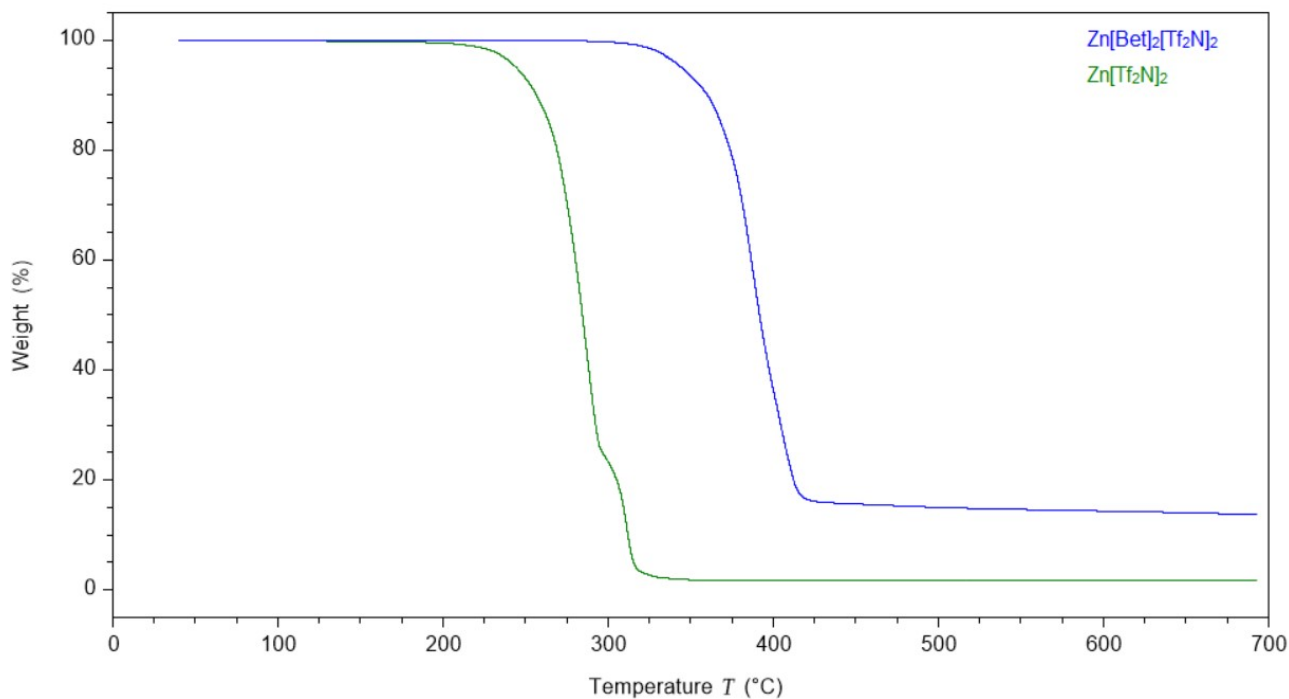

**Figure S43.** Comparison of thermogravimetric analysis of  $\text{Zn}[\text{Bet}]_2[\text{Tf}_2\text{N}]_2$  and  $\text{Zn}[\text{Tf}_2\text{N}]_2$ .



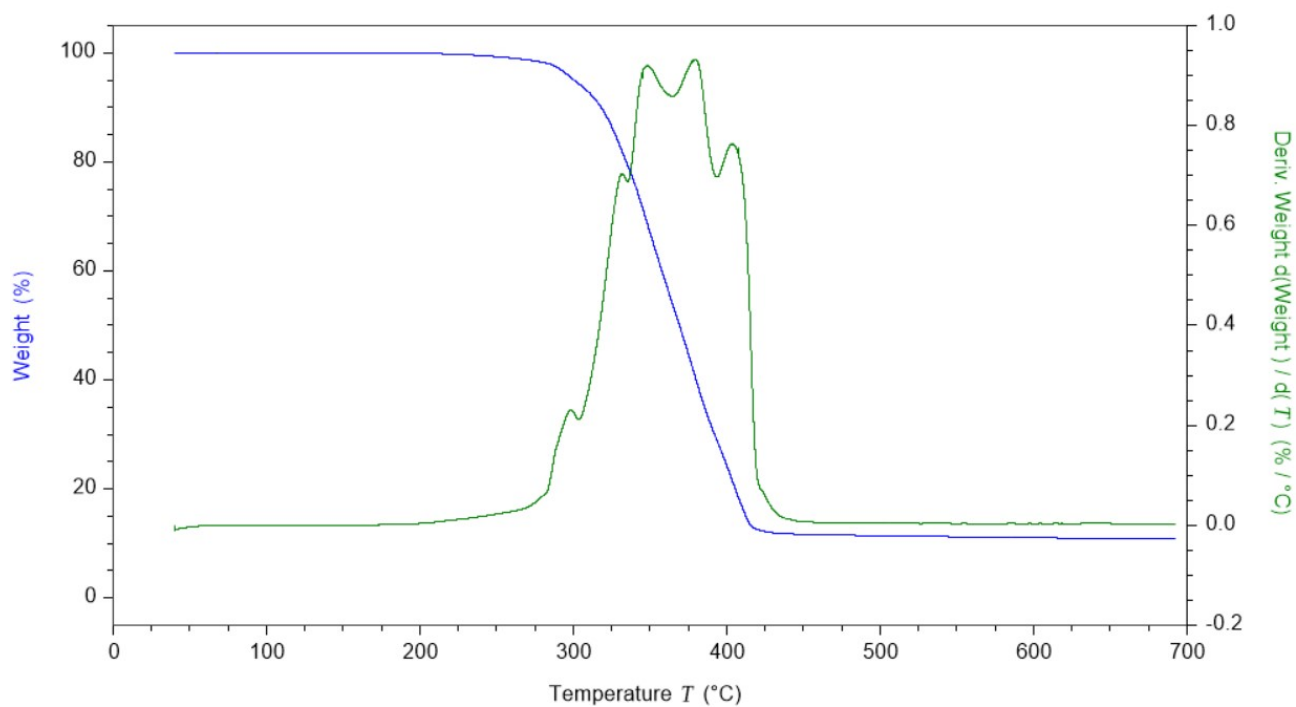

**Figure S44.** Thermogravimetric analysis of  $\text{Cu[Bet]}_2[\text{Tf}_2\text{N}]_2$ .

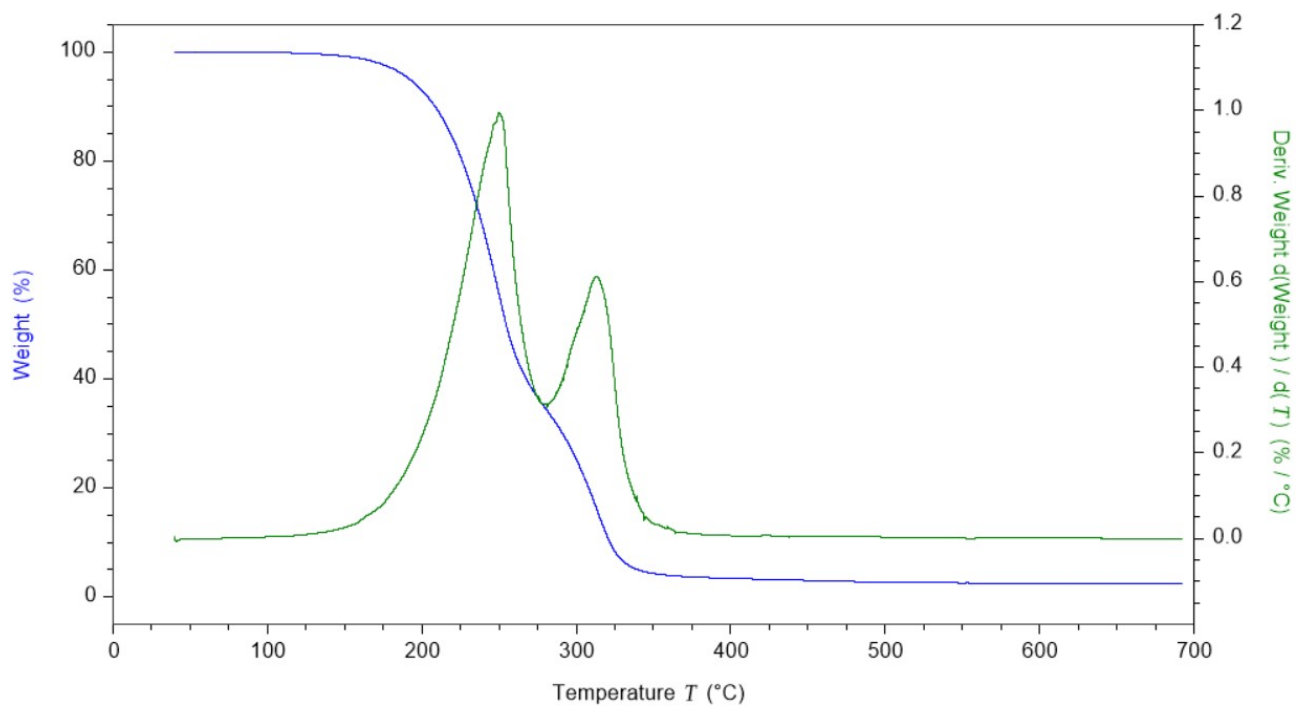

**Figure S45.** Thermogravimetric analysis of  $\text{Cu[Tf}_2\text{N}]_2$ .

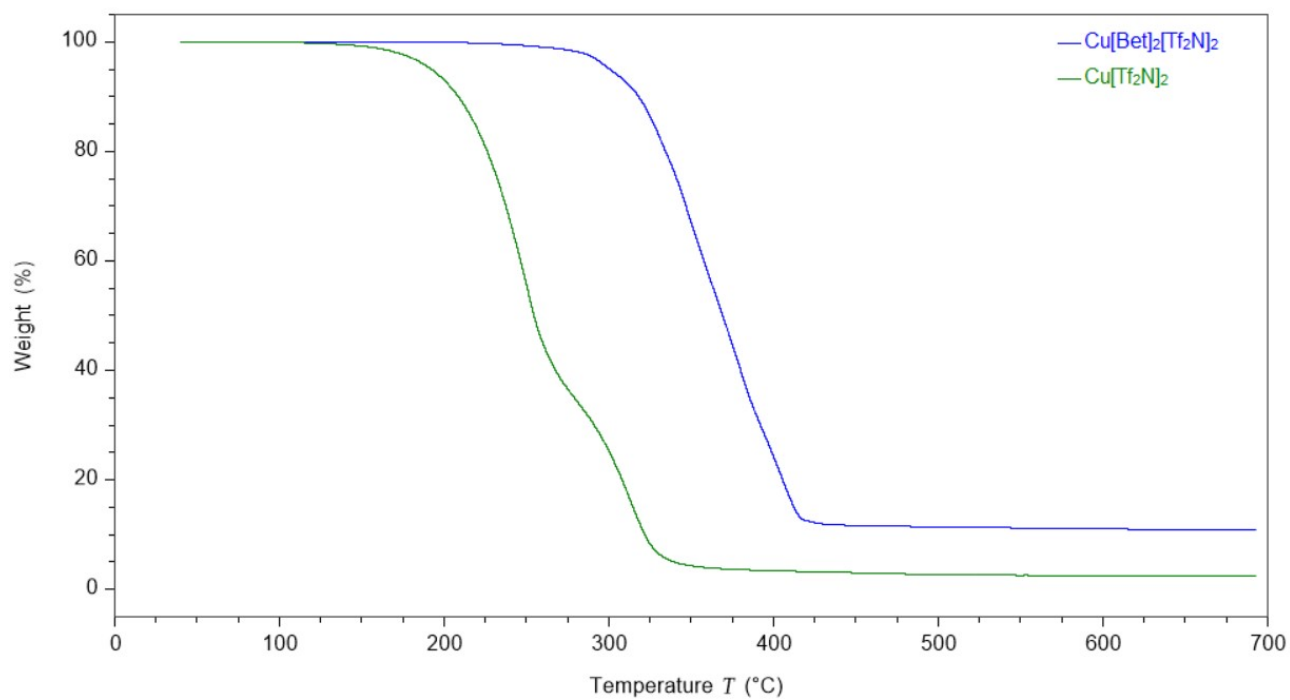

**Figure S46.** Comparison of thermogravimetric analysis of  $\text{Cu}[\text{Bet}]_2[\text{Tf}_2\text{N}]_2$  and  $\text{Cu}[\text{Tf}_2\text{N}]_2$ .

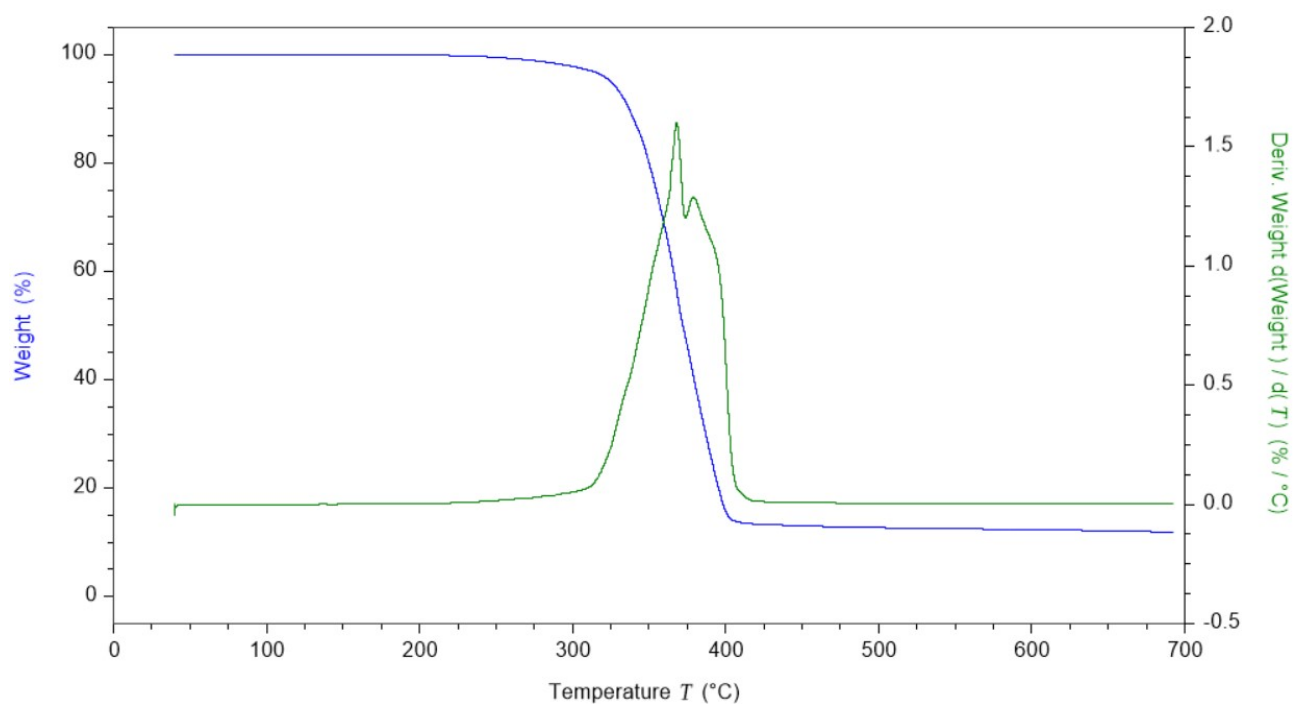

**Figure S47.** Thermogravimetric analysis of  $\text{Ni}[\text{Bet}]_2[\text{Tf}_2\text{N}]_2$ .

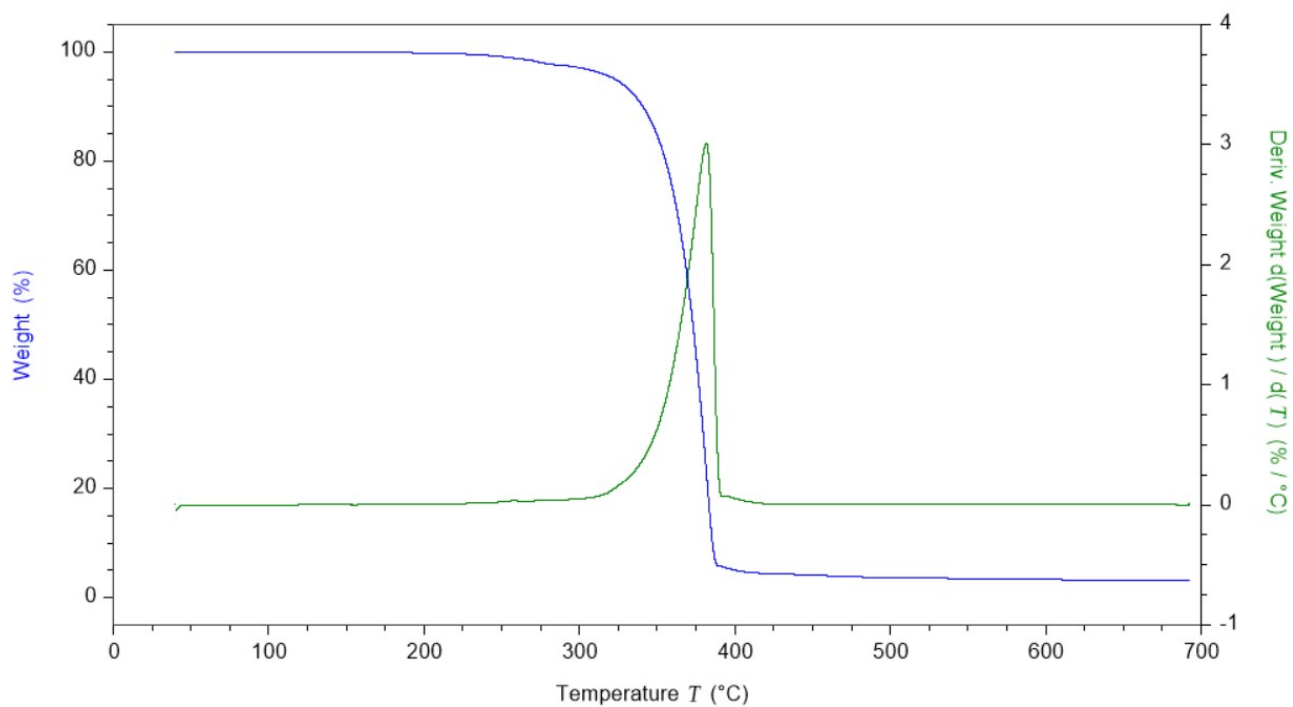

**Figure S48.** Thermogravimetric analysis of  $\text{Ni}[\text{Tf}_2\text{N}]_2$ .

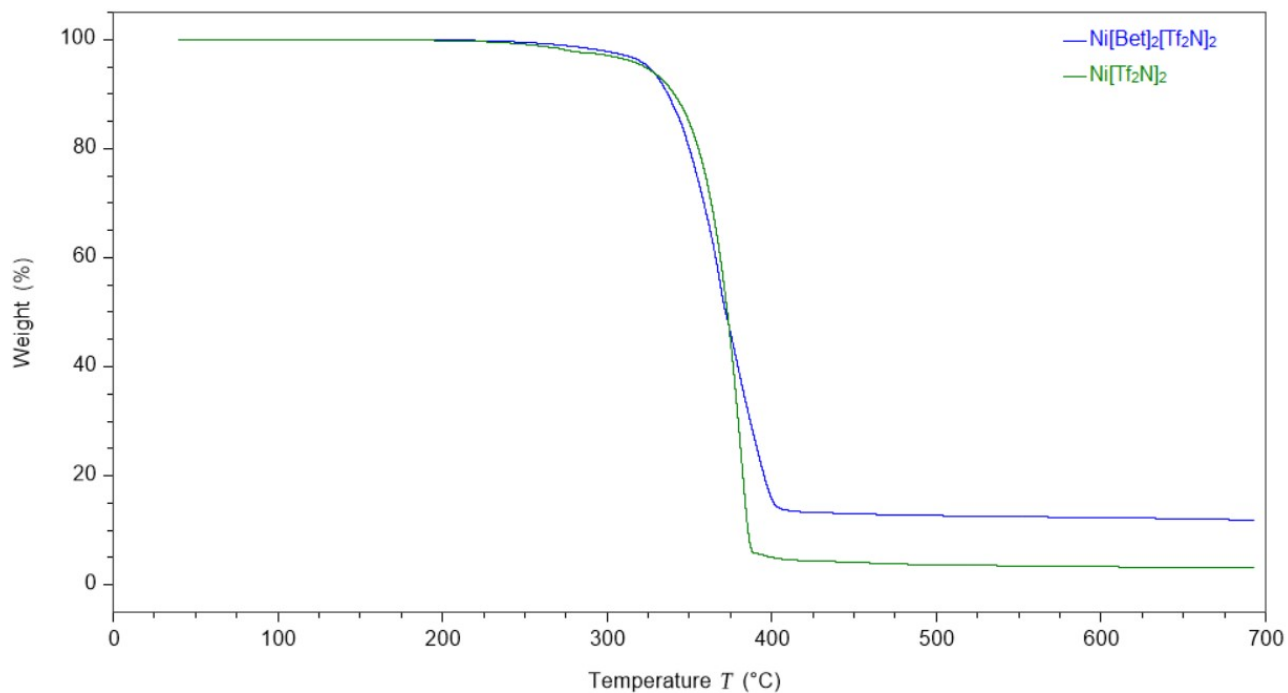

**Figure S49.** Comparison of thermogravimetric analysis of  $\text{Ni}[\text{Bet}]_2[\text{Tf}_2\text{N}]_2$  and  $\text{Ni}[\text{Tf}_2\text{N}]_2$ .

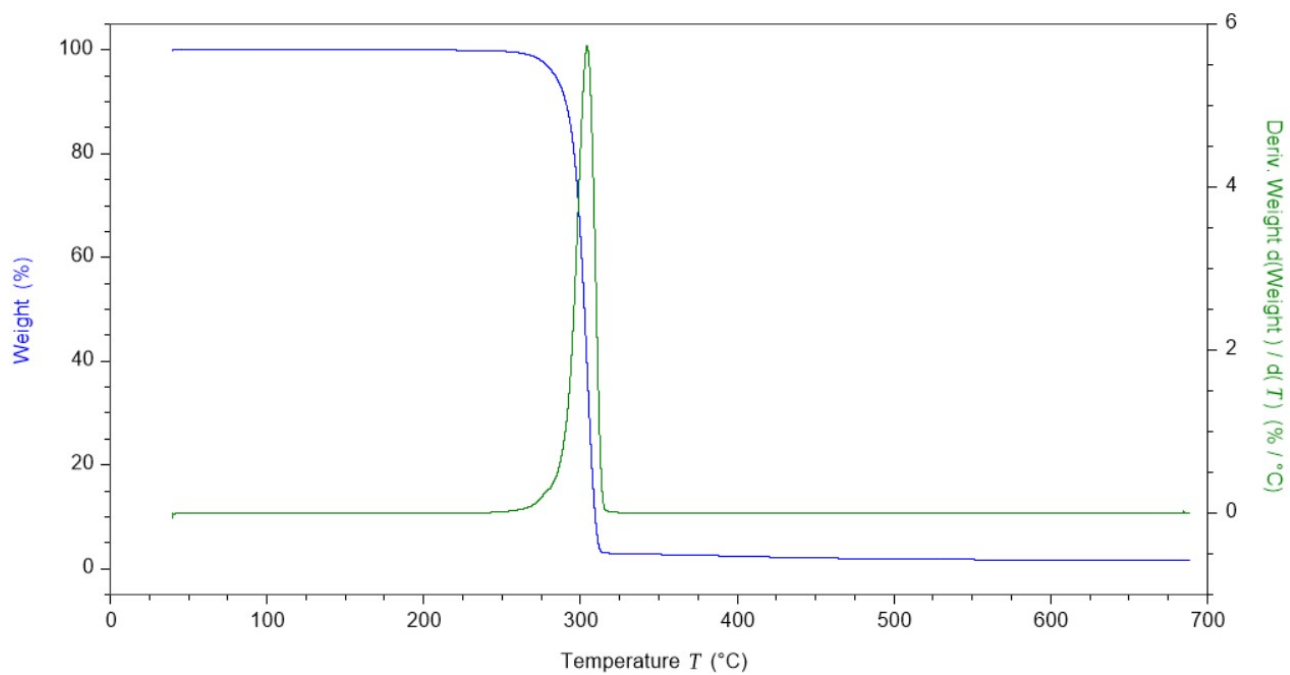

**Figure S50.** Thermogravimetric analysis of betaine.

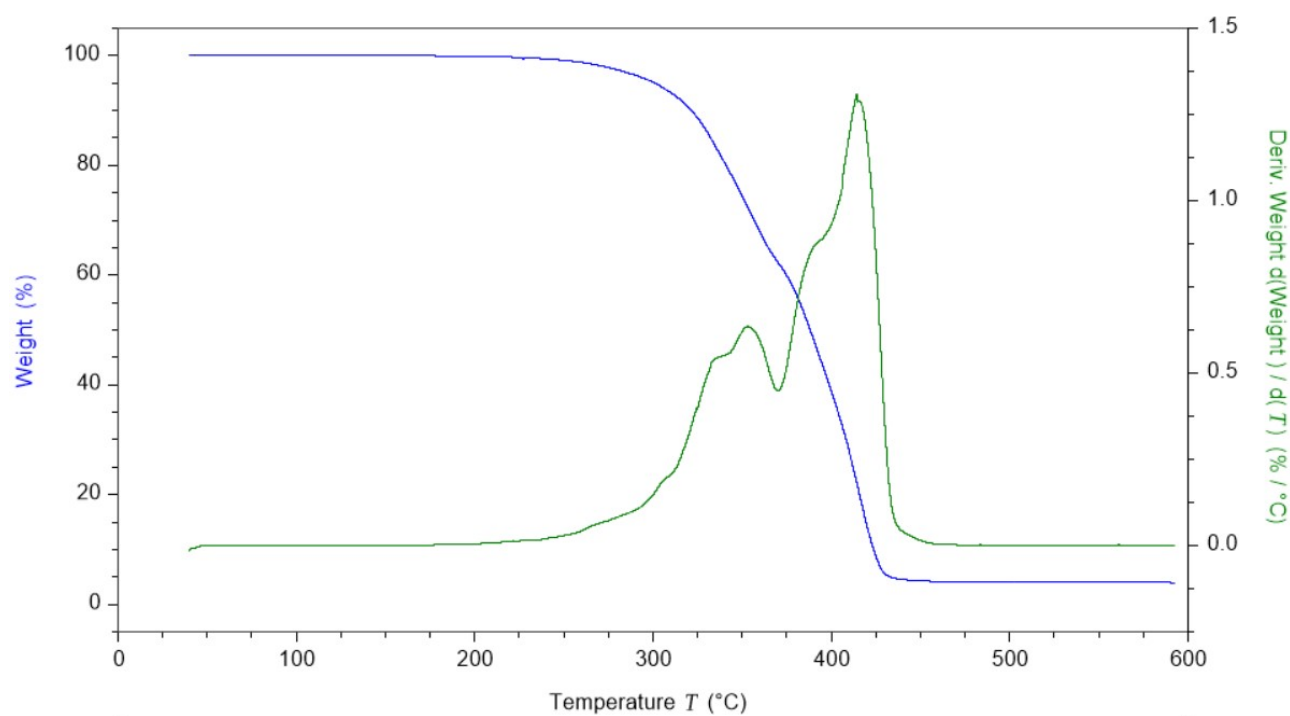

**Figure S51.** Thermogravimetric analysis of  $\text{H[Bet][Tf}_2\text{N]}$ .

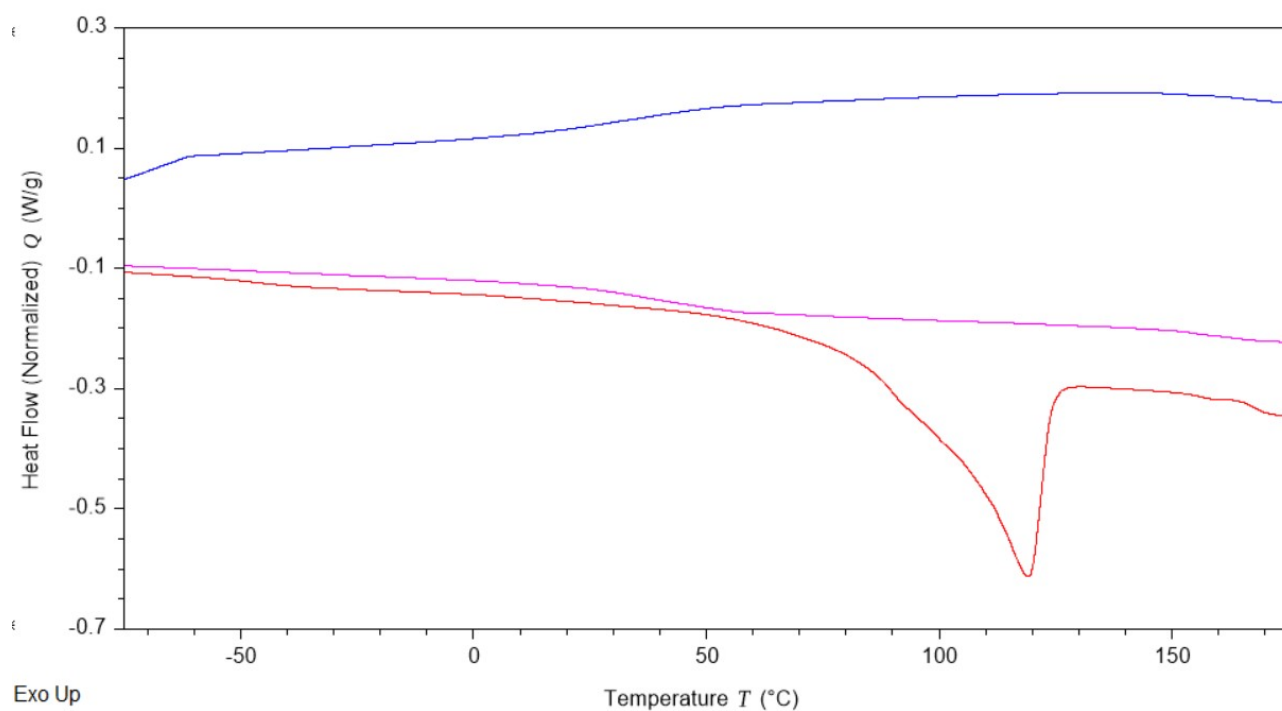

**Figure S52.** Differential scanning calorimetry of Mg[Bet]<sub>2</sub>[Tf<sub>2</sub>N]<sub>2</sub>.

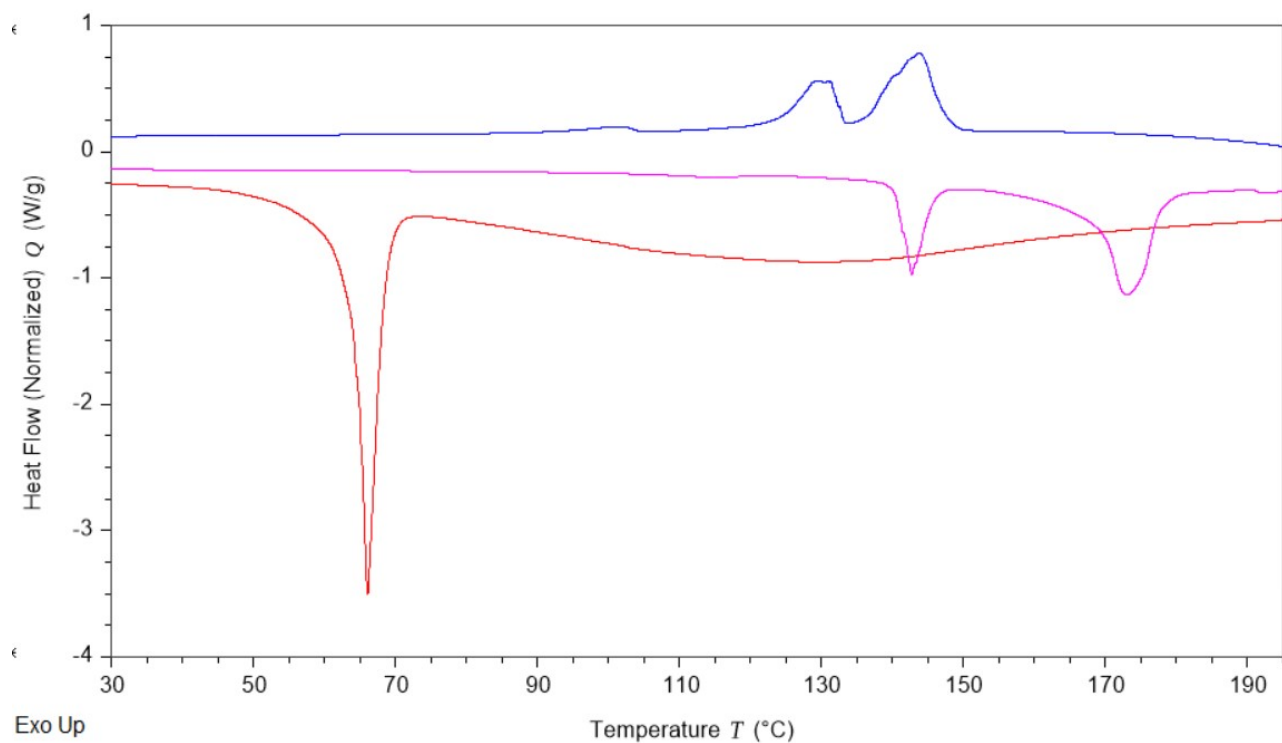

**Figure S53.** Differential scanning calorimetry of Mg[Tf<sub>2</sub>N]<sub>2</sub>.

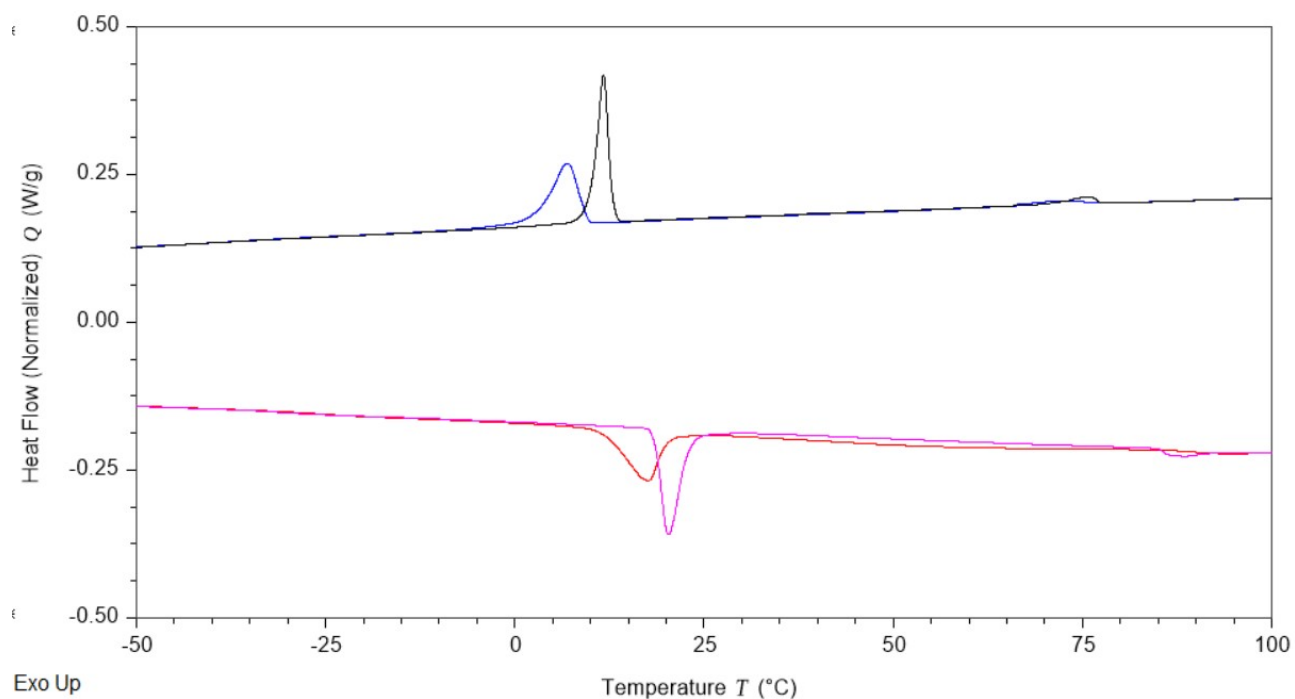

**Figure S54a.** DSC thermogram of  $\text{Mg[Bet]}_3[\text{Tf}_2\text{N}]_2$ .

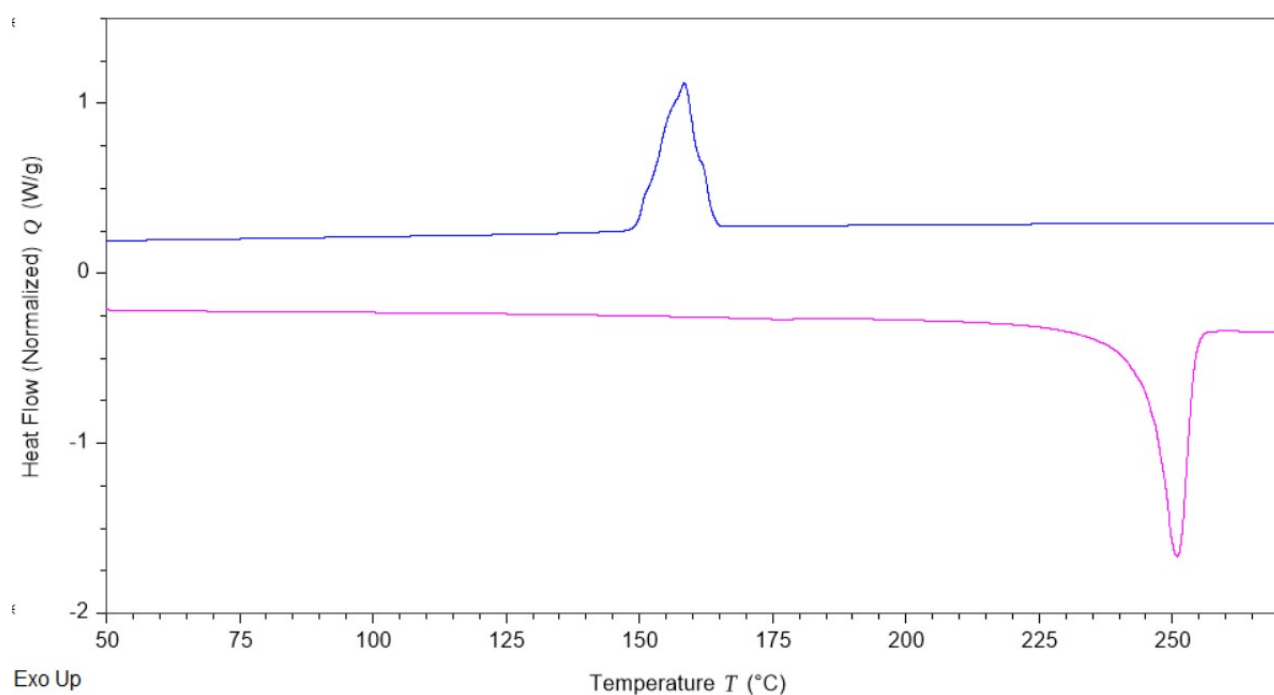

**Figure S54b.** DSC thermogram of  $\text{Mg[Bet]}_3[\text{Tf}_2\text{N}]_2$ , ramp to 280 °C.

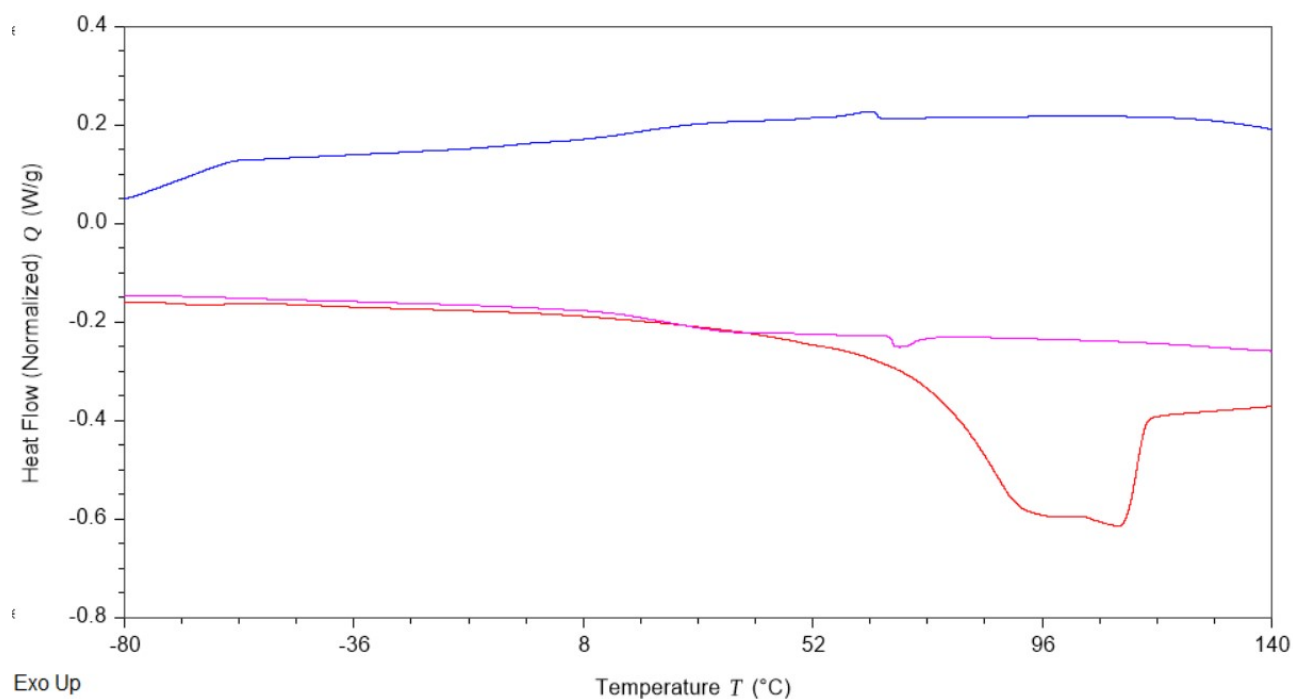

**Figure S55.** Differential scanning calorimetry of  $\text{Ca}[\text{Bet}]_2[\text{Tf}_2\text{N}]_2$ .

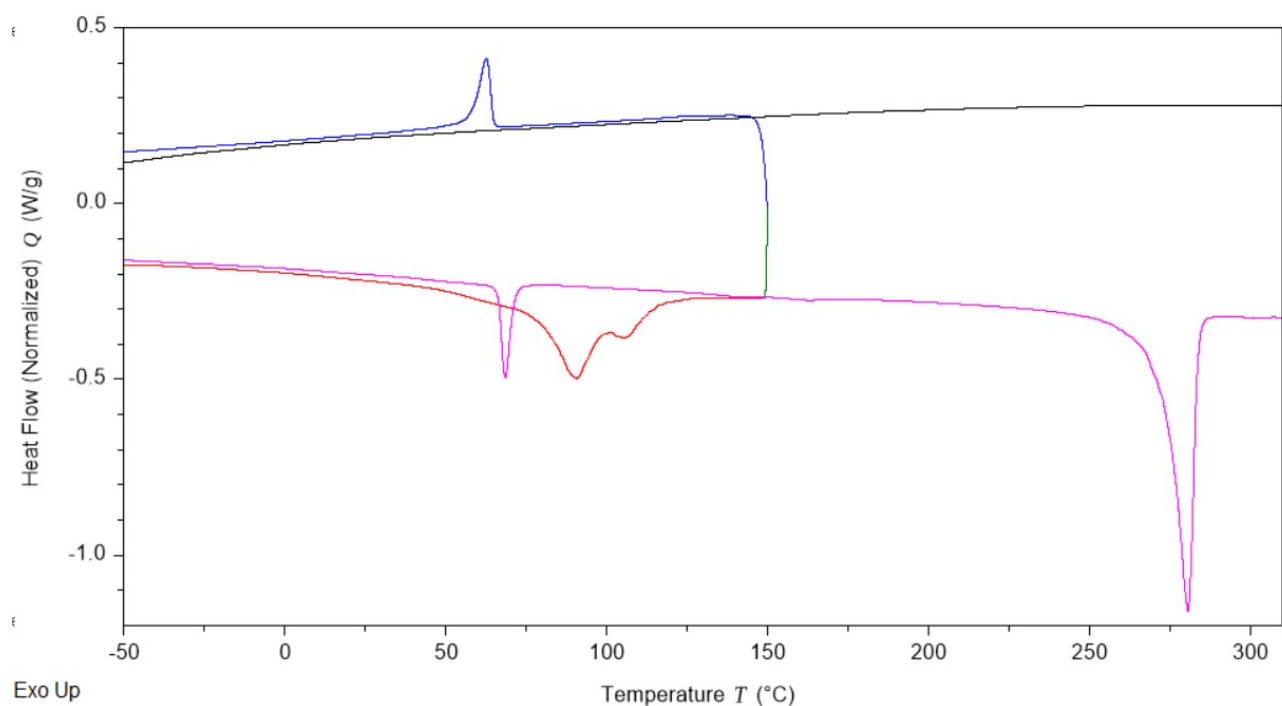

**Figure S56a.** Differential scanning calorimetry of  $\text{Ca}[\text{Bet}]_3[\text{Tf}_2\text{N}]_2$  crystals.

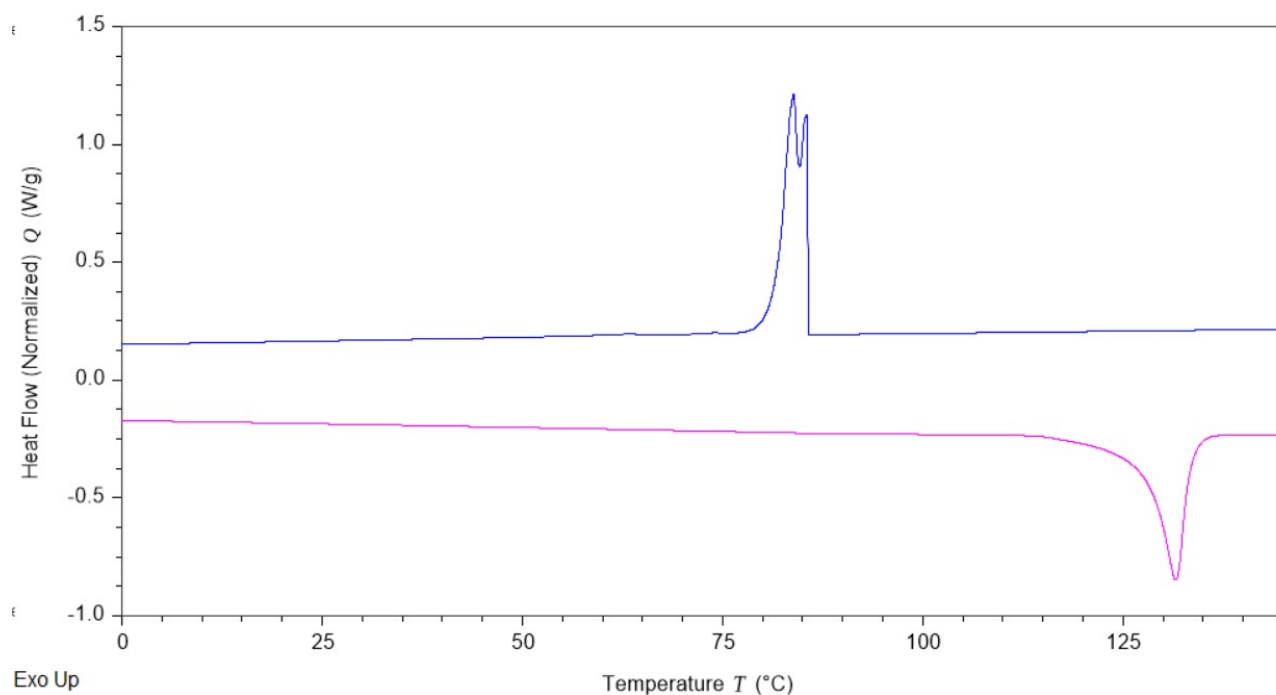

**Figure S56b.** Differential scanning calorimetry of  $\text{Ca}[\text{Bet}]_3[\text{Tf}_2\text{N}]_2$  crystals after the melting transition at about 280 °C.

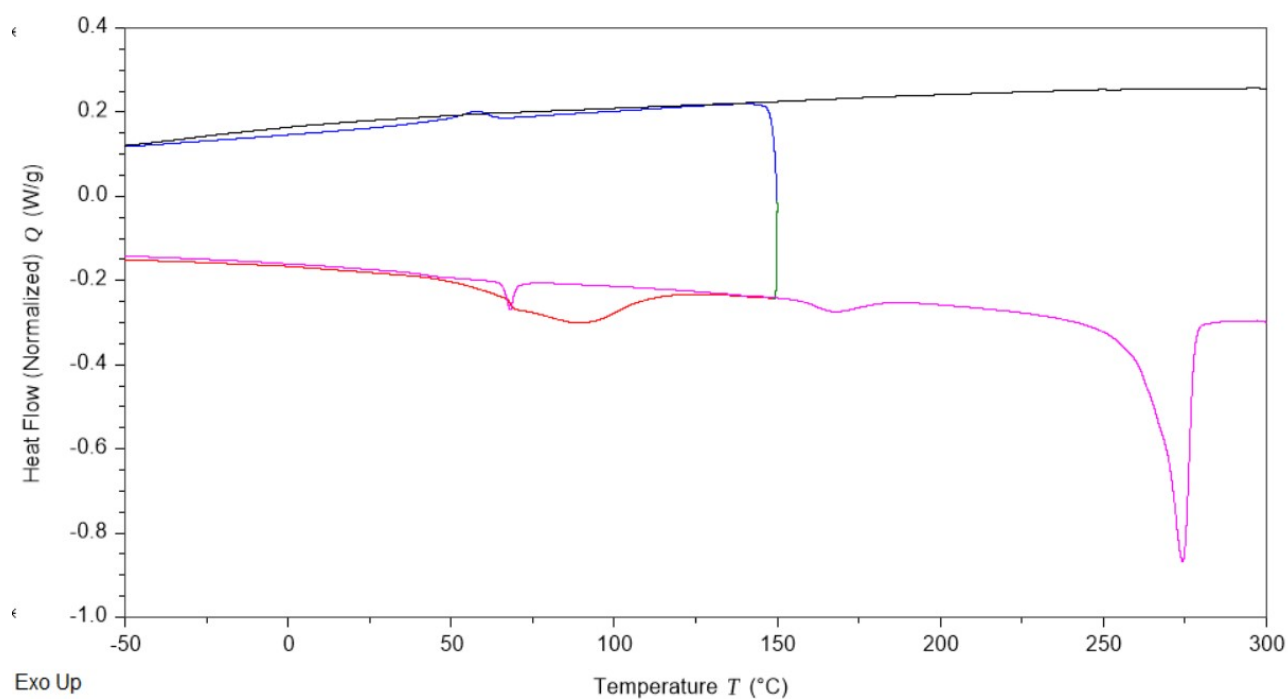

**Figure S56c.** DSC thermogram of  $\text{Ca}[\text{Bet}]_3[\text{Tf}_2\text{N}]_2$  (synthesized).



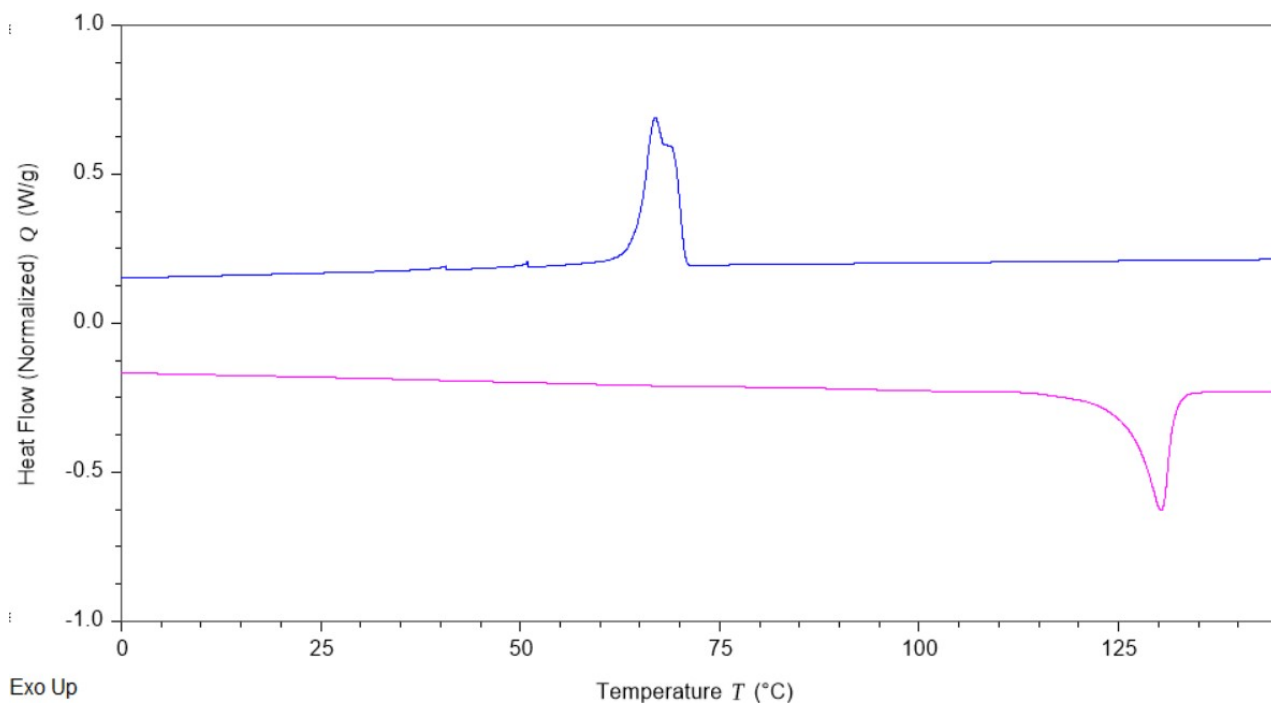

**Figure S56d.** DSC thermogram of  $\text{Ca}[\text{Bet}]_3[\text{Tf}_2\text{N}]_2$  (synthesized).

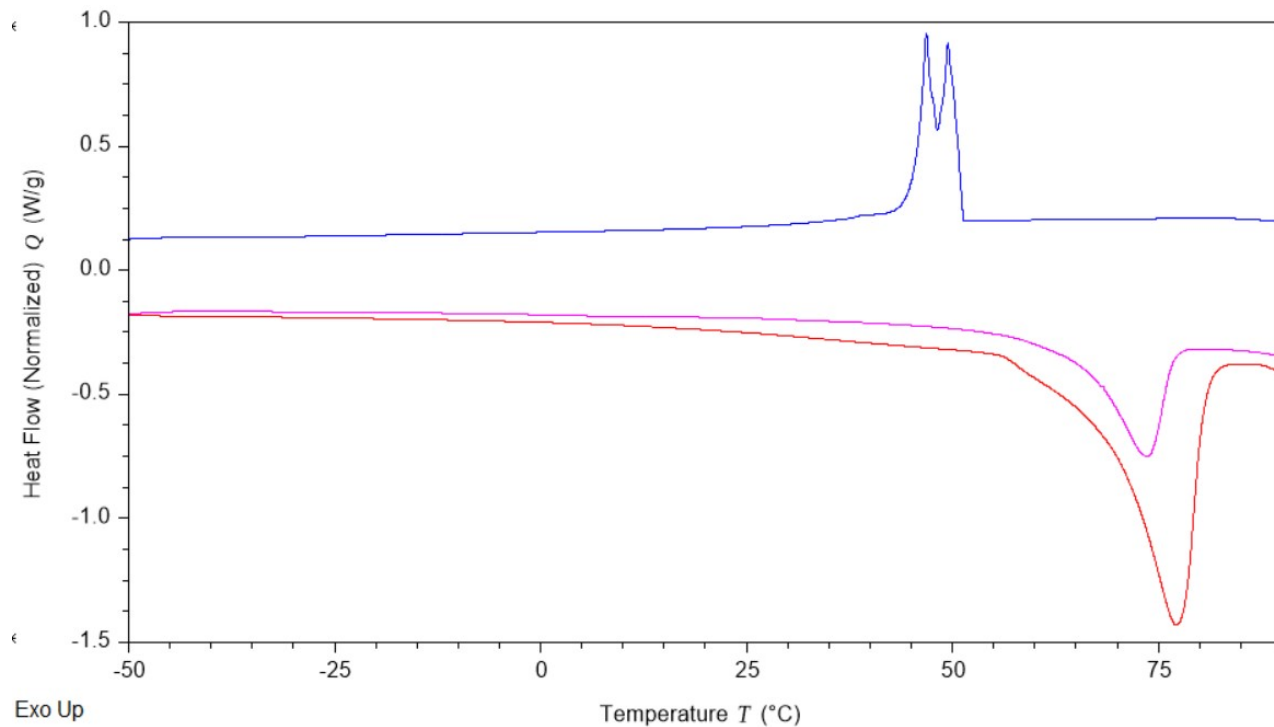

**Figure S57a.** Differential scanning calorimetry of  $\text{Ca}[\text{Tf}_2\text{N}]_2$ .

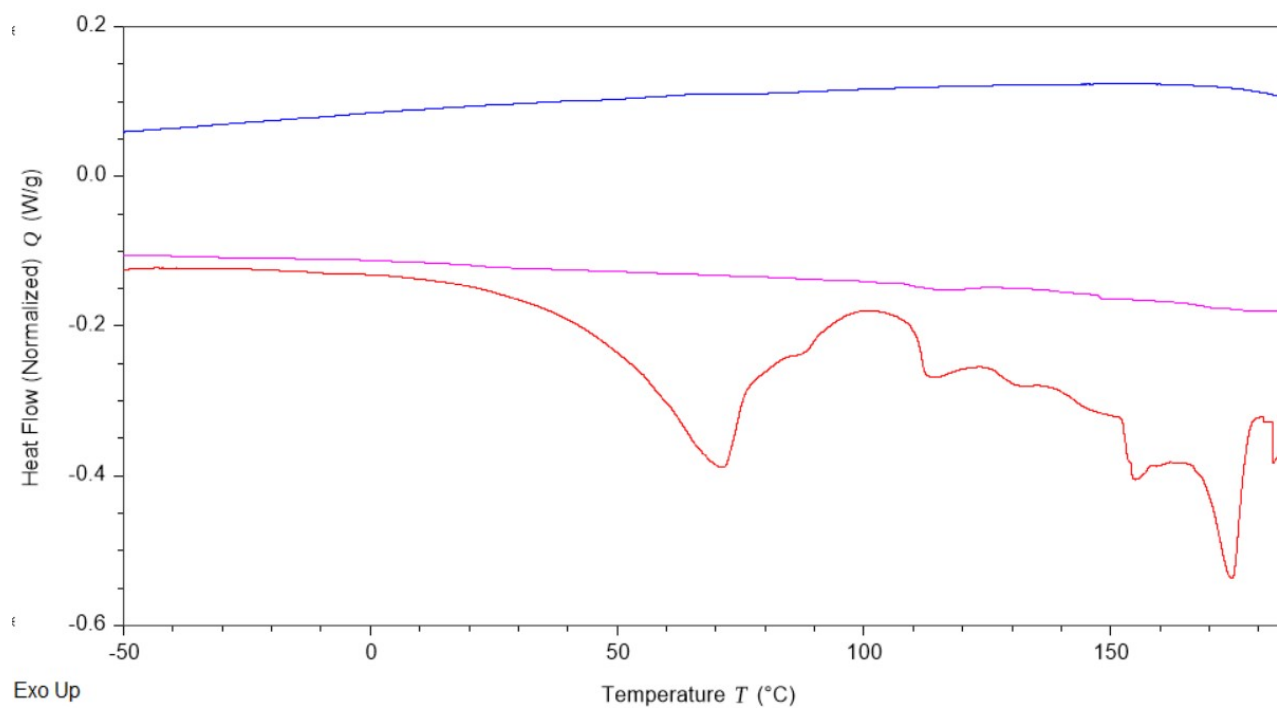

**Figure S57b.** Differential scanning calorimetry of  $\text{Ca}[\text{Tf}_2\text{N}]_2$  above 100 °C.

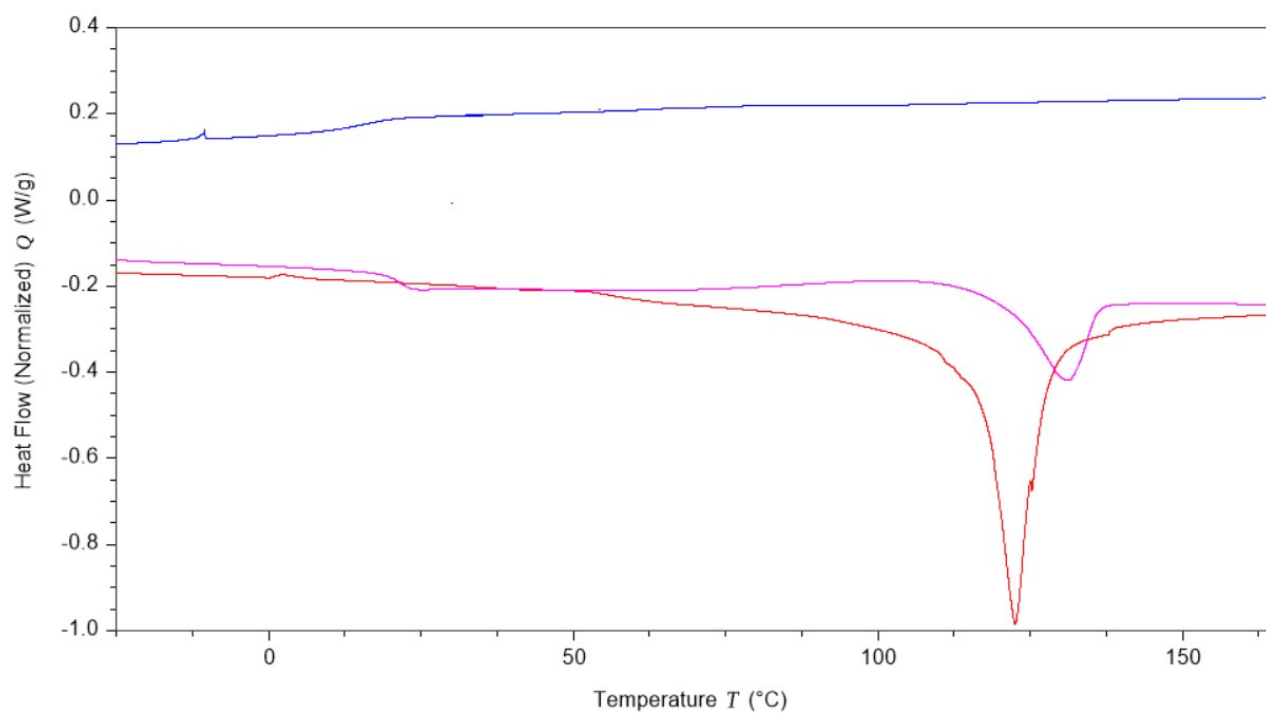

**Figure S58a.** Differential scanning calorimetry of  $\text{Zn}[\text{Bet}]_2[\text{Tf}_2\text{N}]_2$ .

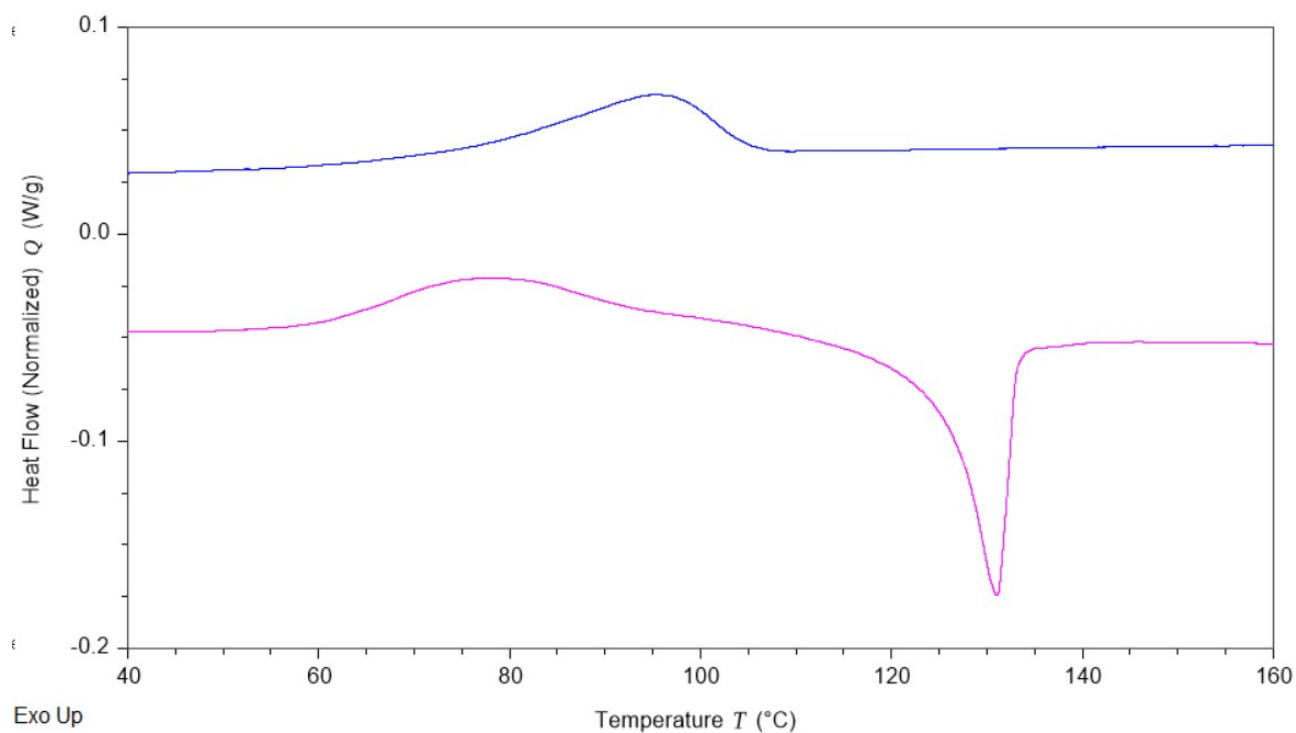

**Figure S58b.** Differential scanning calorimetry of  $\text{Zn[Bet]}_2[\text{Tf}_2\text{N}]_2$ , performed at 2 K/min

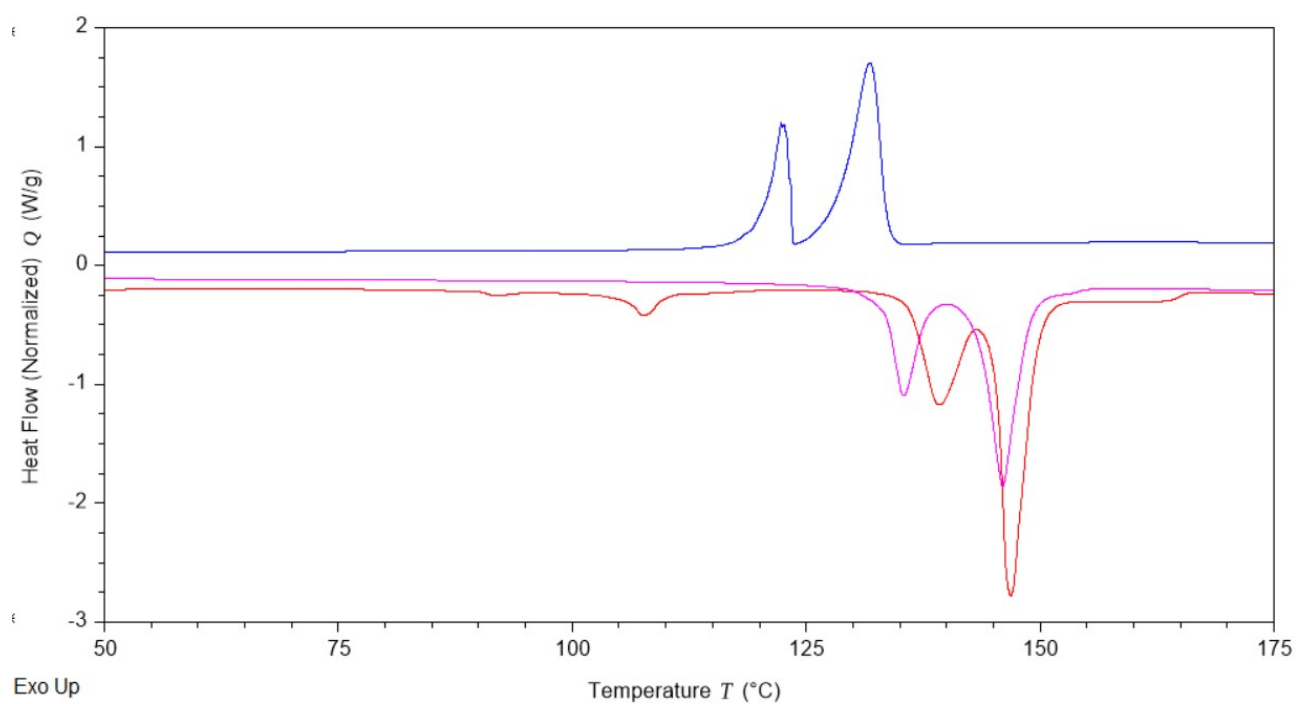

**Figure S59.** Differential scanning calorimetry of  $\text{Zn}[\text{Tf}_2\text{N}]_2$ .

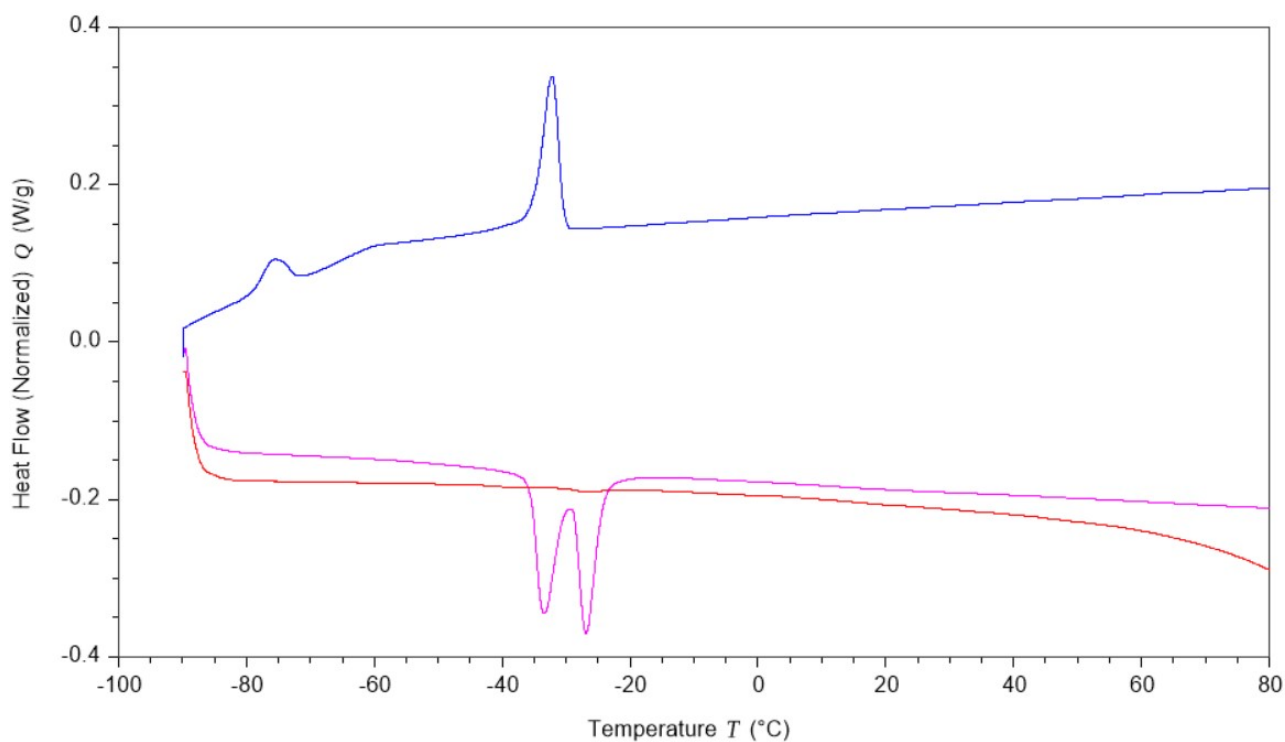

**Figure S60a.** Differential scanning calorimetry of  $\text{Cu}[\text{Bet}]_2[\text{Tf}_2\text{N}]_2$ .

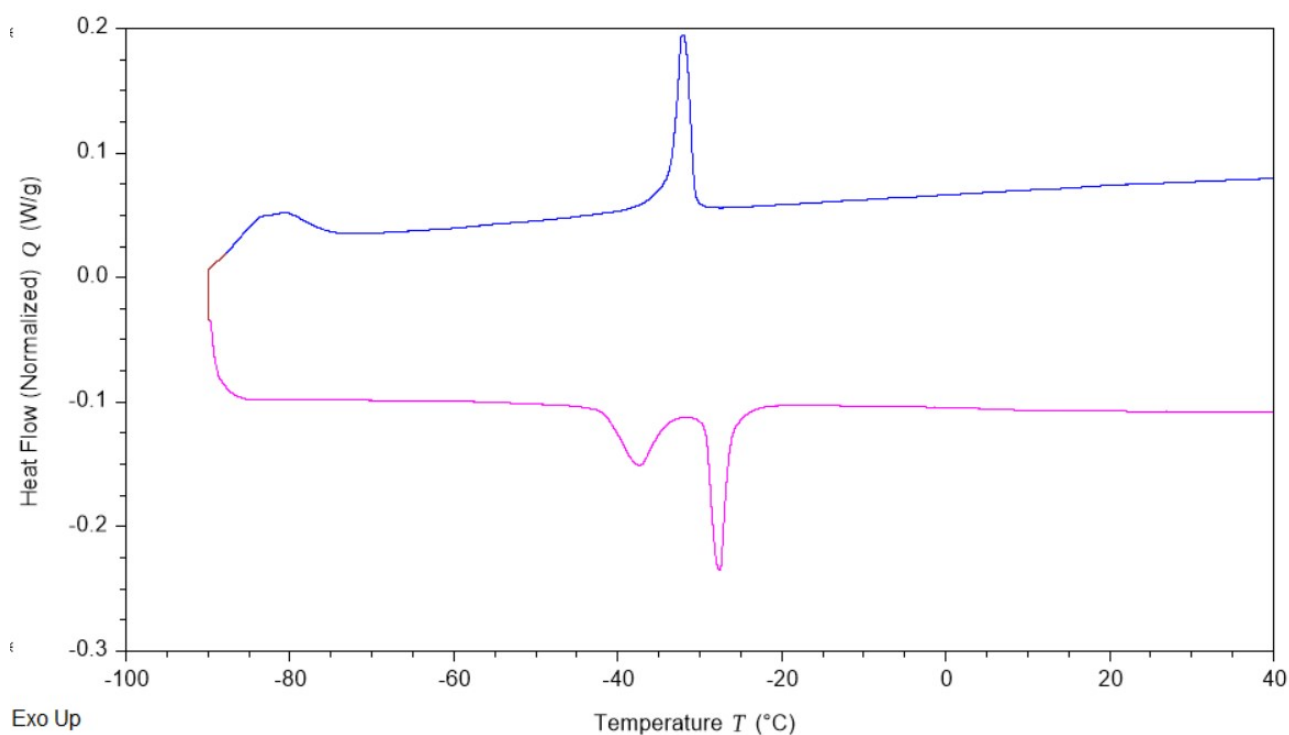

**Figure S60b.** Differential scanning calorimetry of  $\text{Cu}[\text{Bet}]_2[\text{Tf}_2\text{N}]_2$ , performed at 5 K/min.

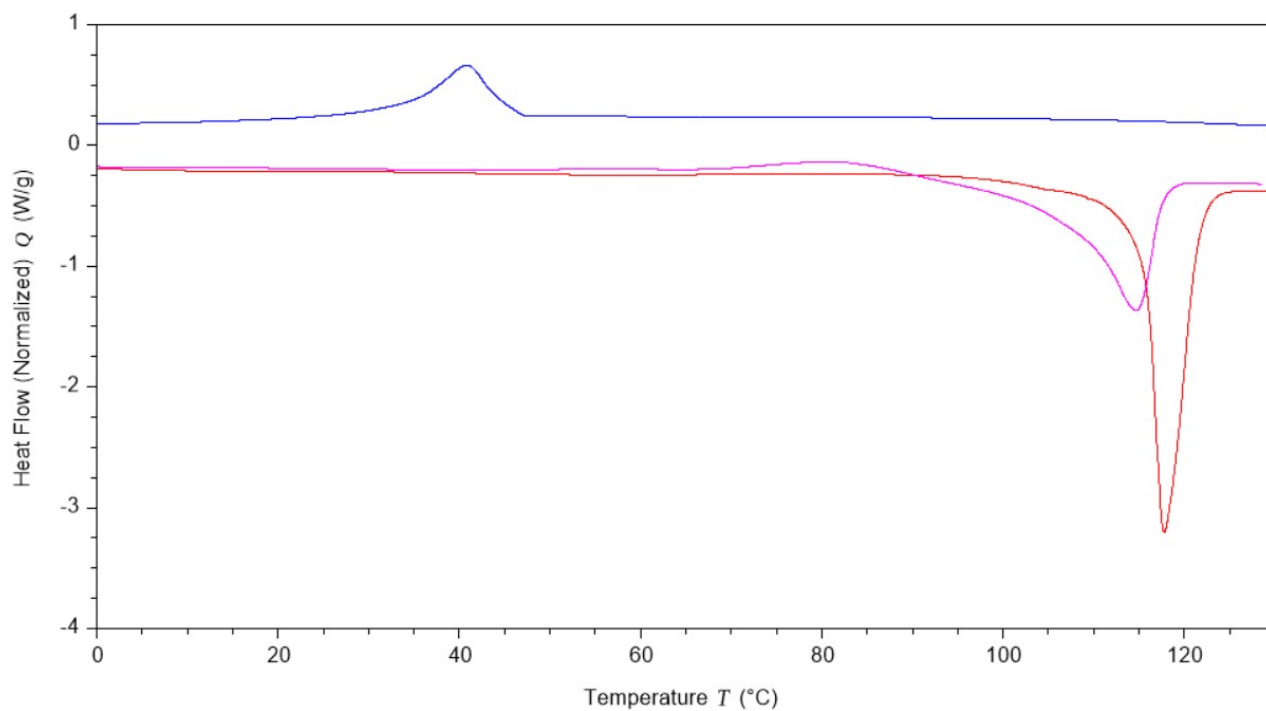

**Figure S61.** Differential scanning calorimetry of  $\text{Cu}[\text{Tf}_2\text{N}]_2$ .

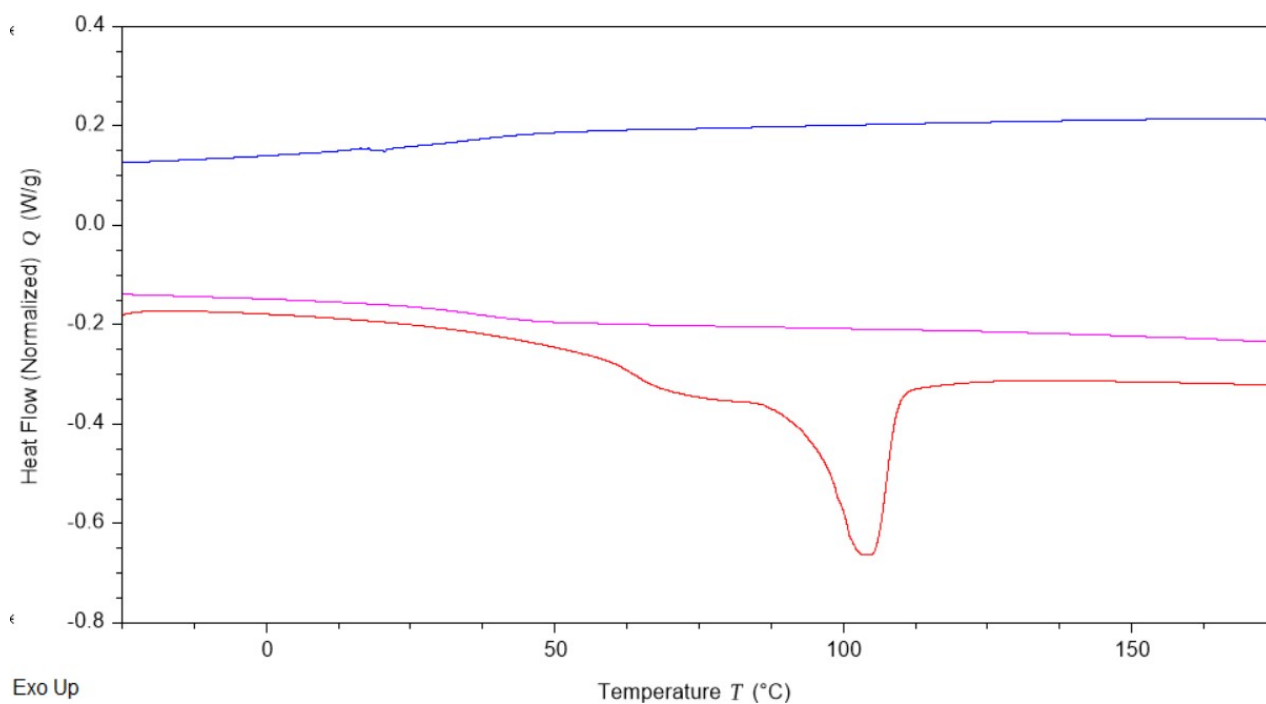

**Figure S62.** Differential scanning calorimetry of  $\text{Ni}[\text{Bet}]_2[\text{Tf}_2\text{N}]_2$ .

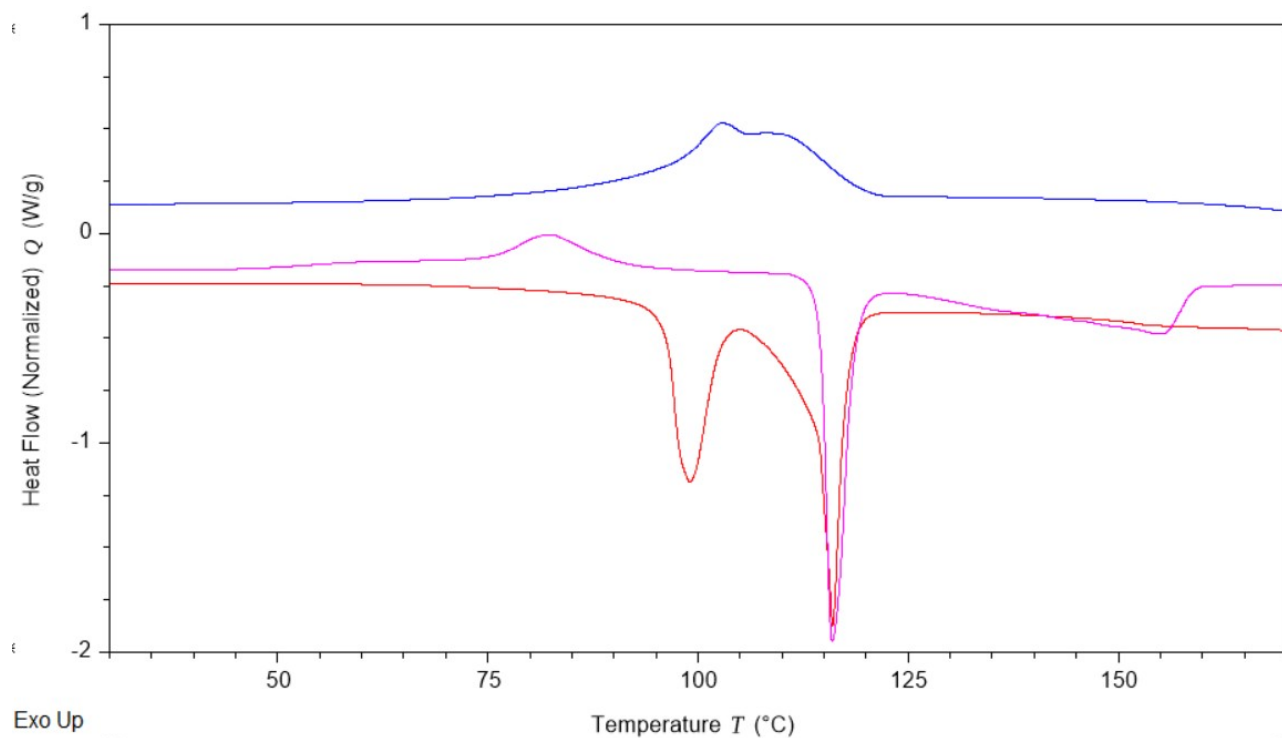

**Figure S63a.** Differential scanning calorimetry of Ni[Tf<sub>2</sub>N]<sub>2</sub>.

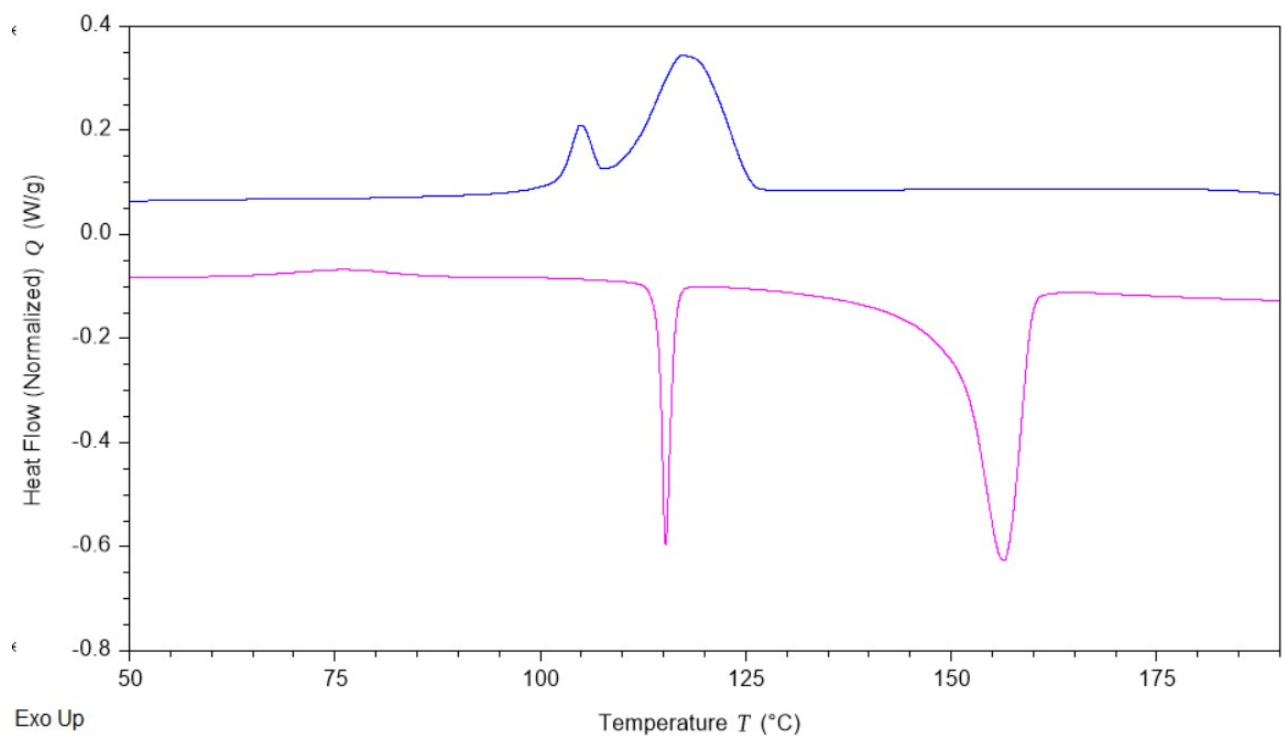

**Figure S63b.** Differential scanning calorimetry of Ni[Tf<sub>2</sub>N]<sub>2</sub> performed at 5 K/min.

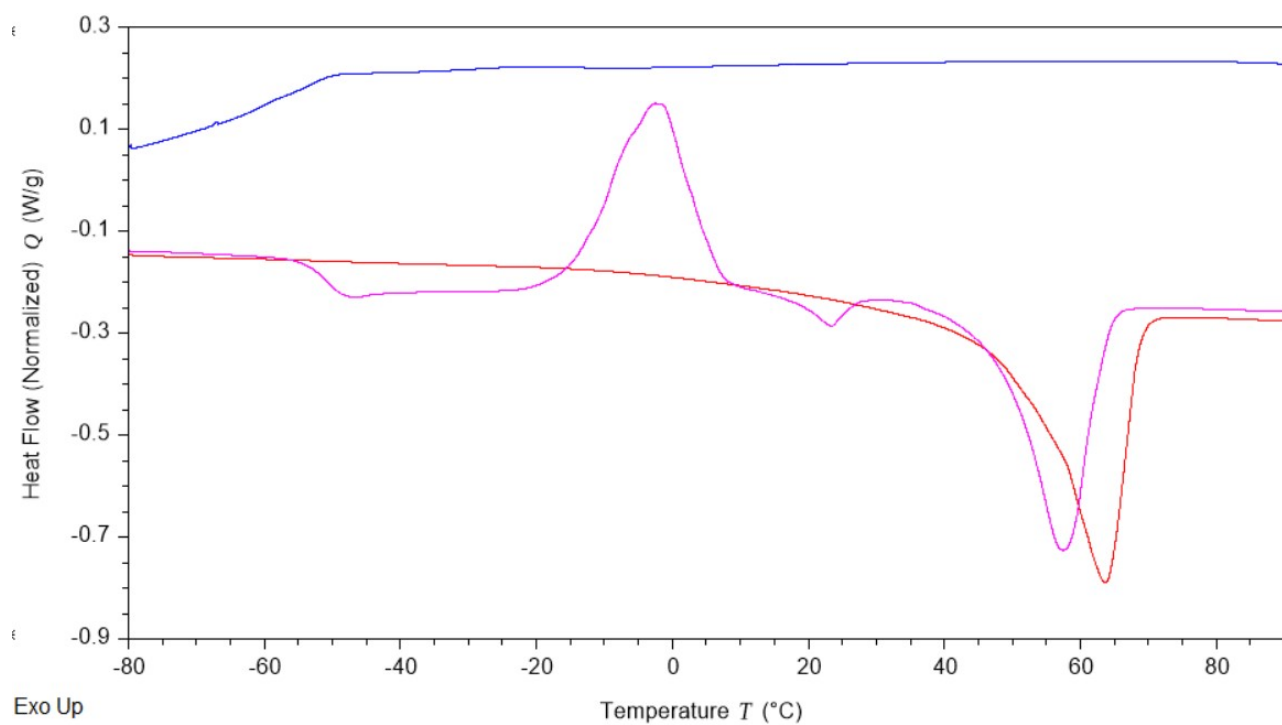

**Figure S64.** Differential scanning calorimetry of H[Bet][Tf<sub>2</sub>N]

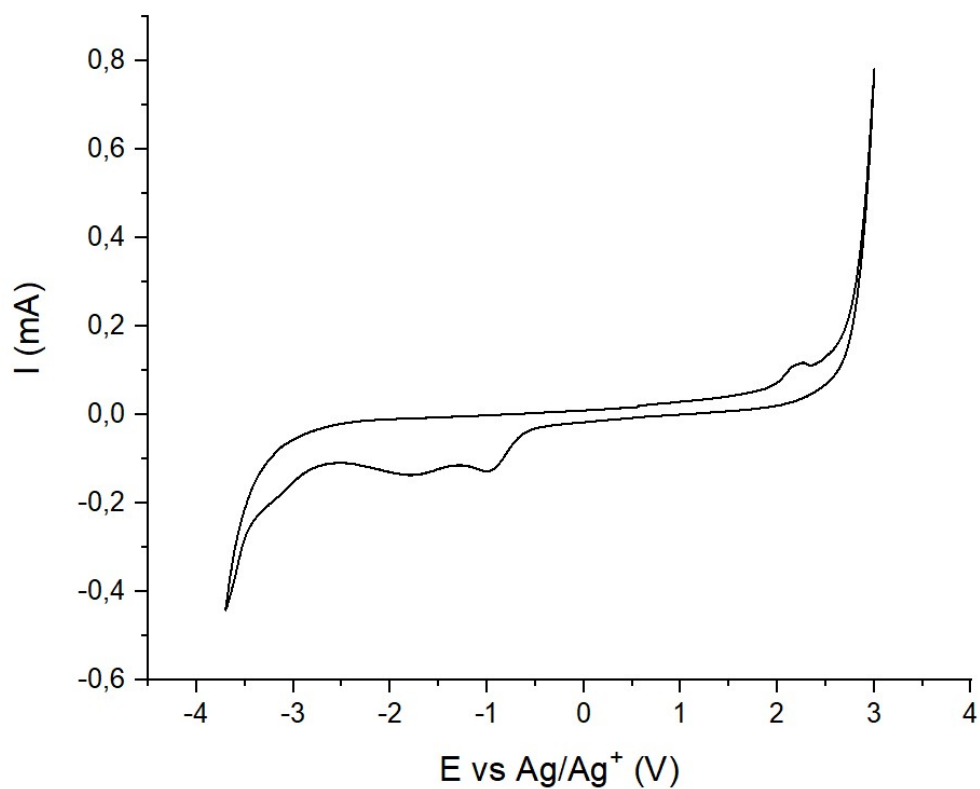

**Figure S65.** Cyclic voltammogram of  $\text{Mg}[\text{Bet}]_2[\text{Tf}_2\text{N}]_2$  0.1 M in MeCN, on a GC working electrode.

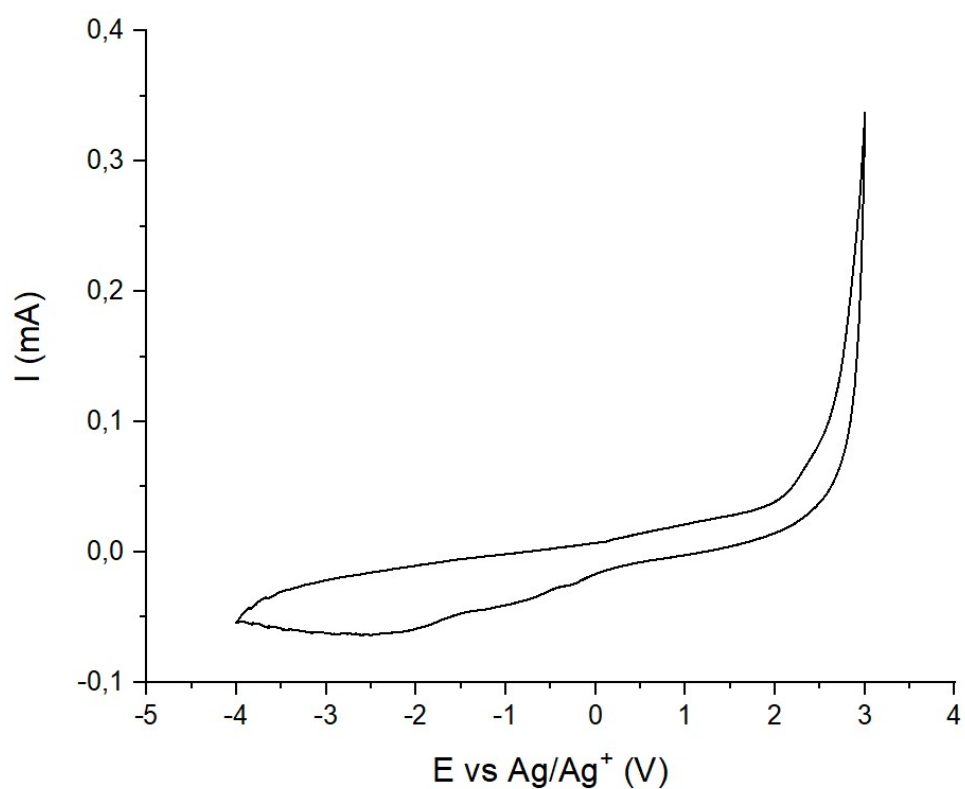

**Figure S66.** Cyclic voltammogram of  $\text{Ca}[\text{Tf}_2\text{N}]_2$  0.1 M in MeCN, on a GC working electrode.



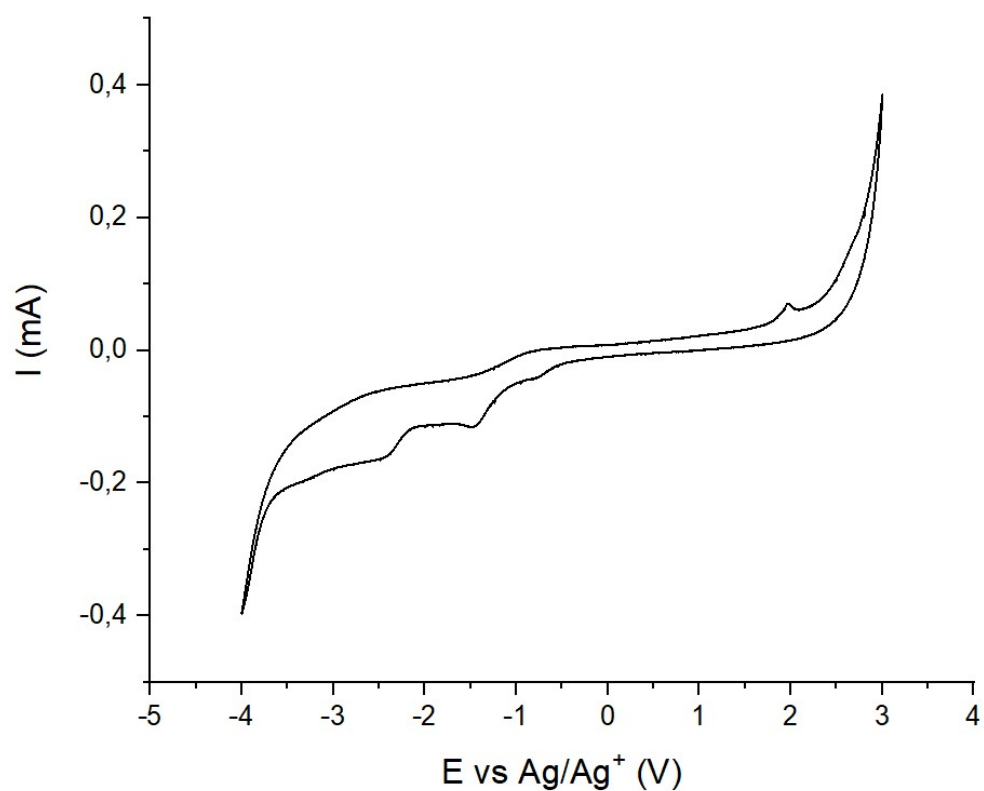

**Figure S67.** Cyclic voltammogram of  $\text{Ca}[\text{Bet}]_2[\text{Tf}_2\text{N}]_2$  0.1 M in MeCN, on a GC working electrode.

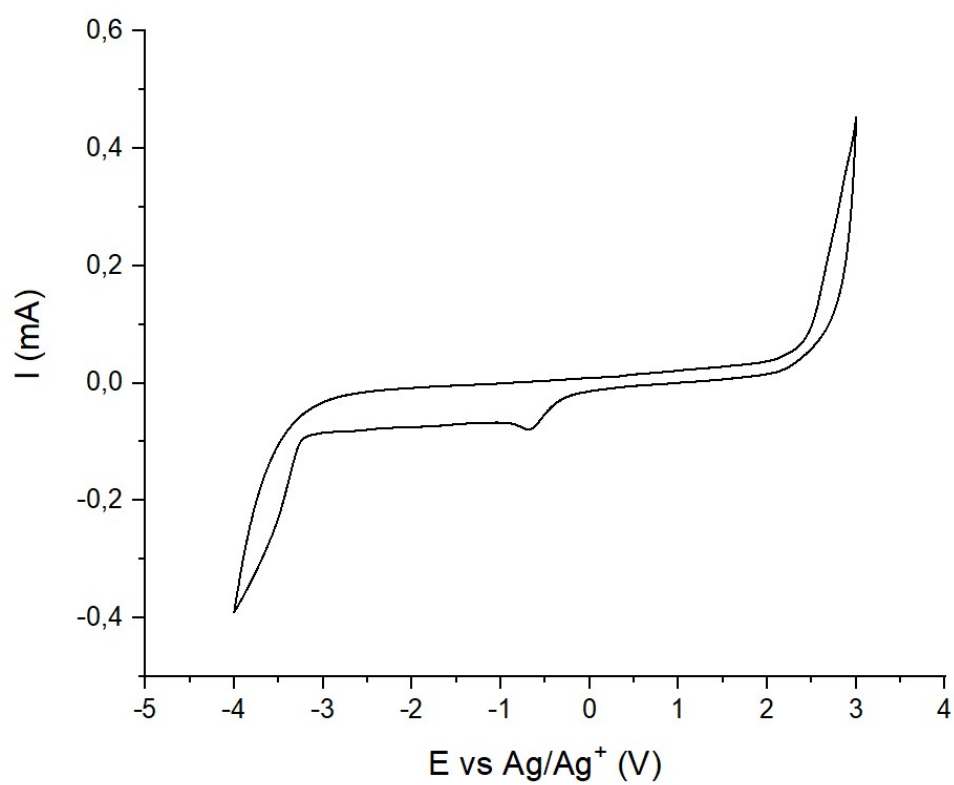

**Figure S68.** Cyclic voltammogram of  $\text{Ca}[\text{Tf}_2\text{N}]_2$  0.1 M in MeCN, on a GC working electrode.

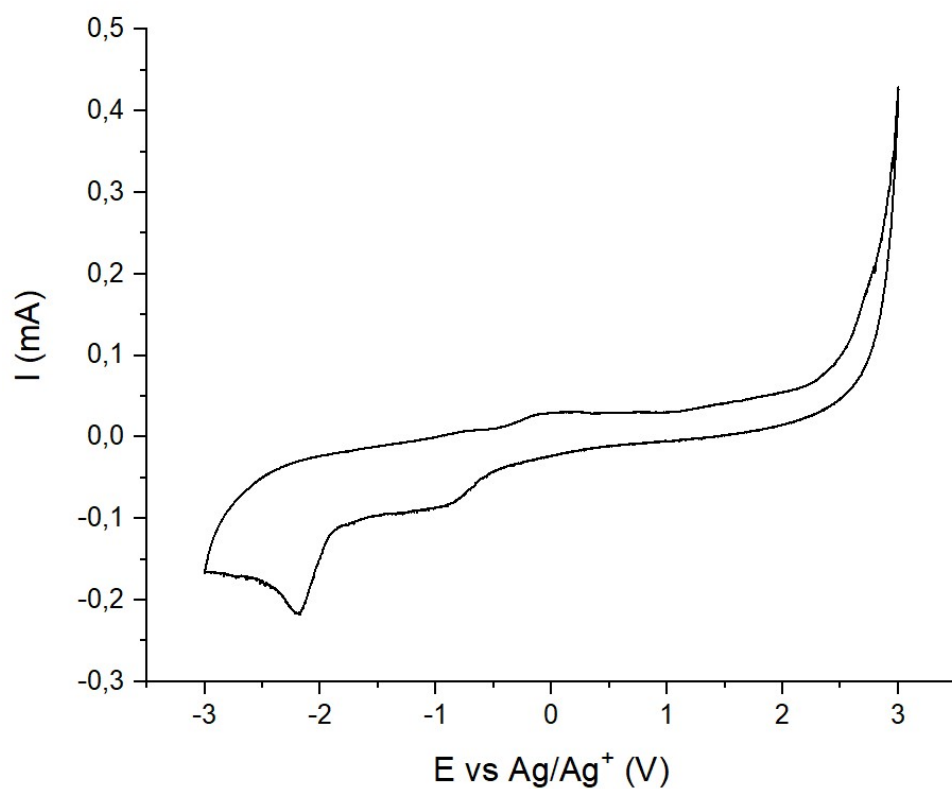

**Figure S69.** Cyclic voltammogram of  $\text{Zn}[\text{Bet}]_2[\text{Tf}_2\text{N}]_2$  0.1 M in MeCN, on a GC working electrode.

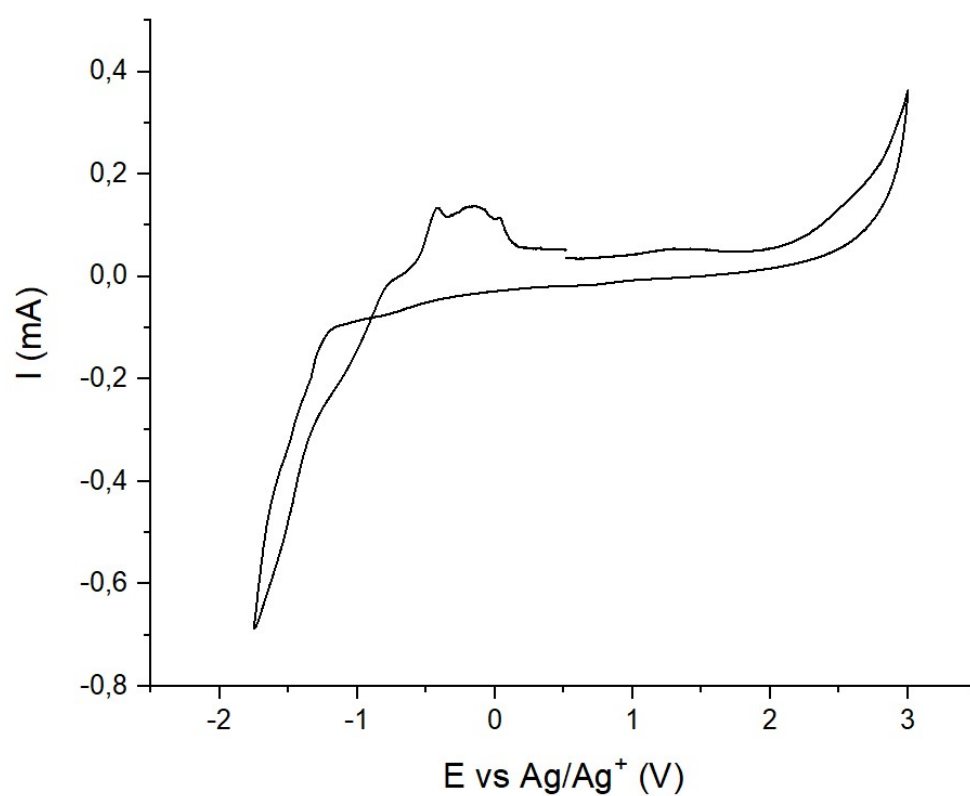

**Figure S70.** Cyclic voltammogram of  $\text{Zn}[\text{Tf}_2\text{N}]_2$  0.1 M in MeCN, on a GC working electrode.

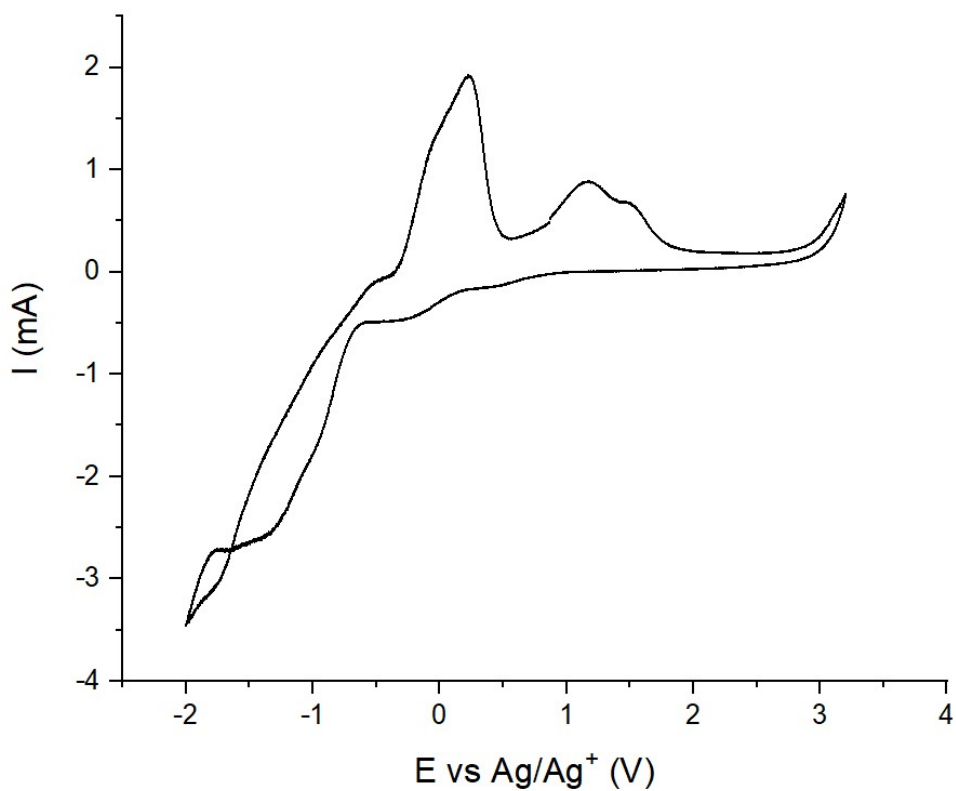

**Figure S71.** Cyclic voltammogram of  $\text{Cu}[\text{Bet}]_2[\text{Tf}_2\text{N}]_2$  0.1 M in MeCN, on a GC working electrode.

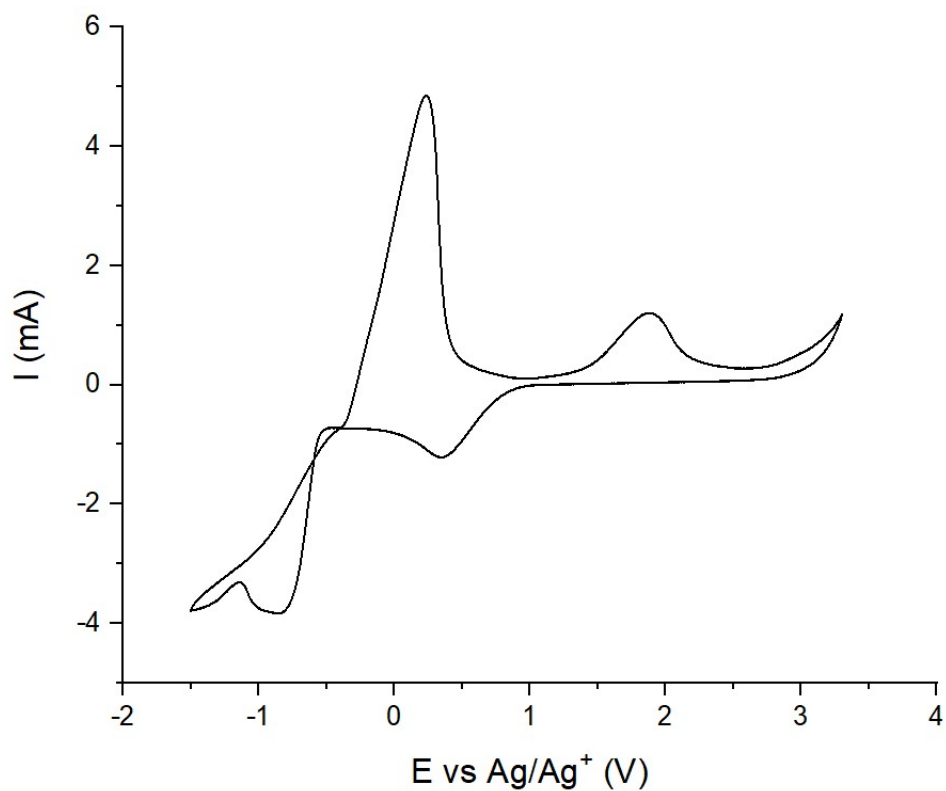

**Figure S72.** Cyclic voltammogram of  $\text{Cu}[\text{Tf}_2\text{N}]_2$  0.1 M in MeCN, on a GC working electrode.

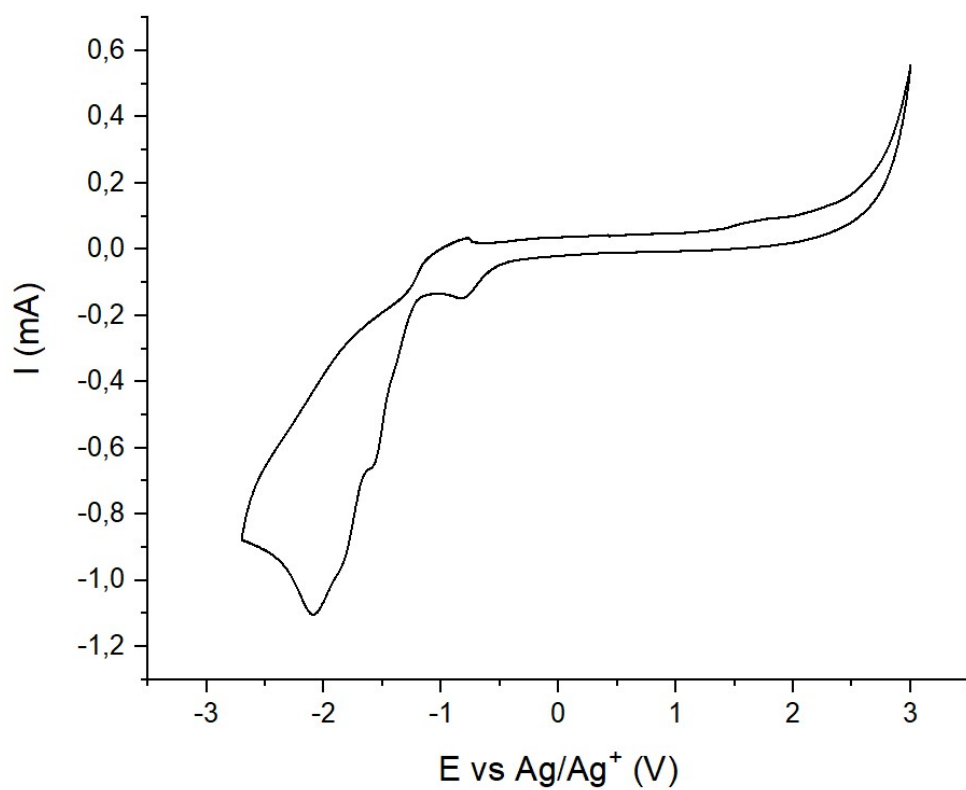

**Figure S73.** Cyclic voltammogram of  $\text{Ni}[\text{Bet}]_2[\text{Tf}_2\text{N}]_2$  0.1 M in MeCN, on a GC working electrode.

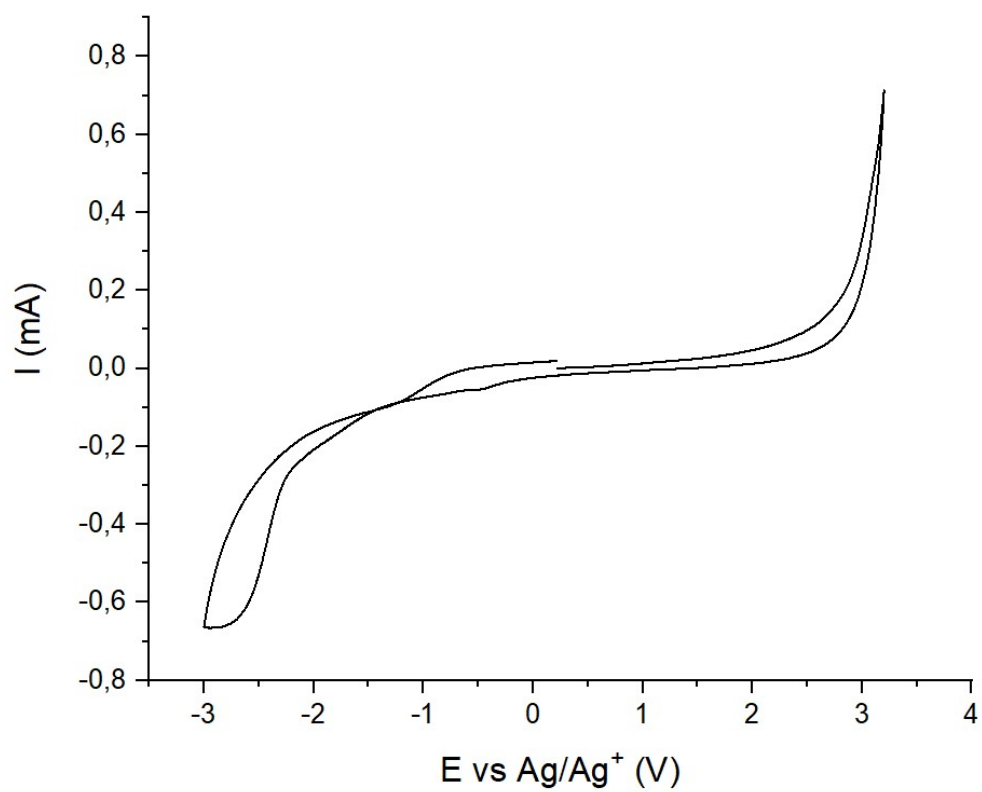

**Figure S74.** Cyclic voltammogram of  $\text{Ni}[\text{Tf}_2\text{N}]_2$  0.1 M in MeCN, on a GC working electrode.

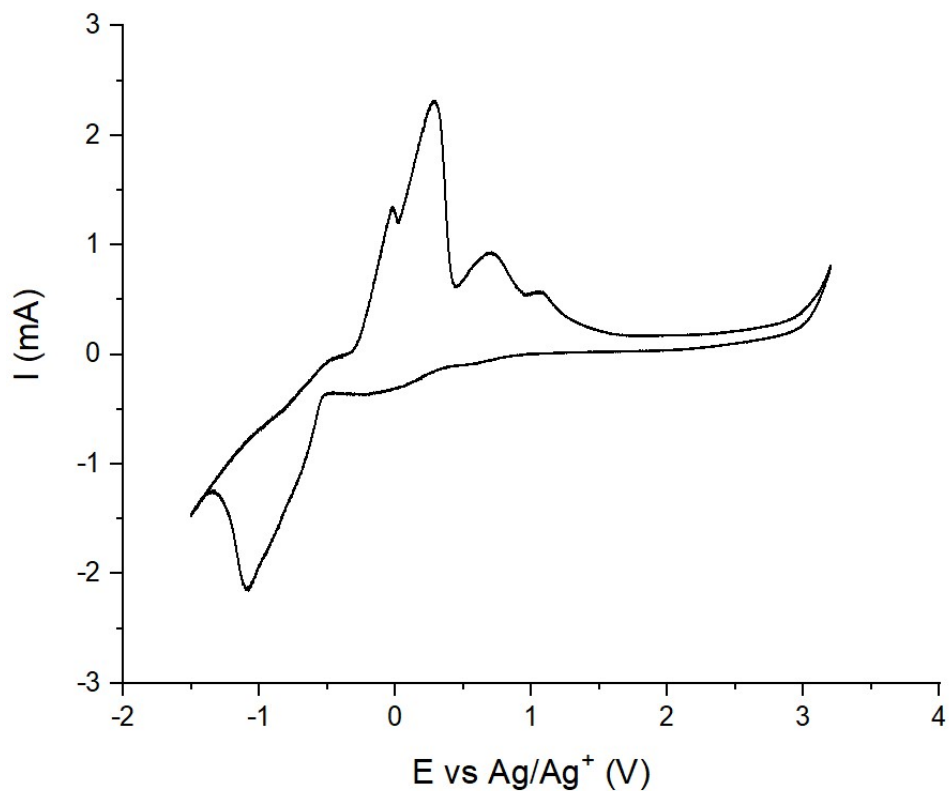

**Figure S75.** Cyclic voltammogram of  $\text{Cu}[\text{Bet}]_2[\text{Tf}_2\text{N}]_2$  0.1 M in MeCN, on a GC working electrode.

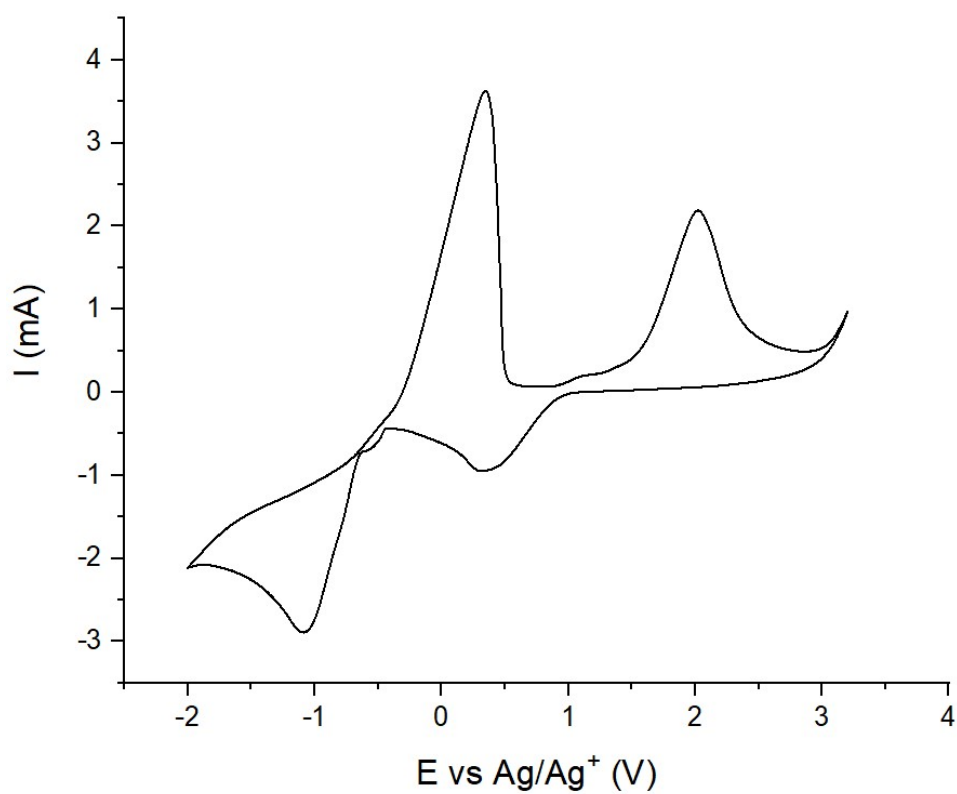

**Figure S76.** Cyclic voltammogram of  $\text{Cu}[\text{Tf}_2\text{N}]_2$  0.1 M in MeCN, on a Pt working electrode.

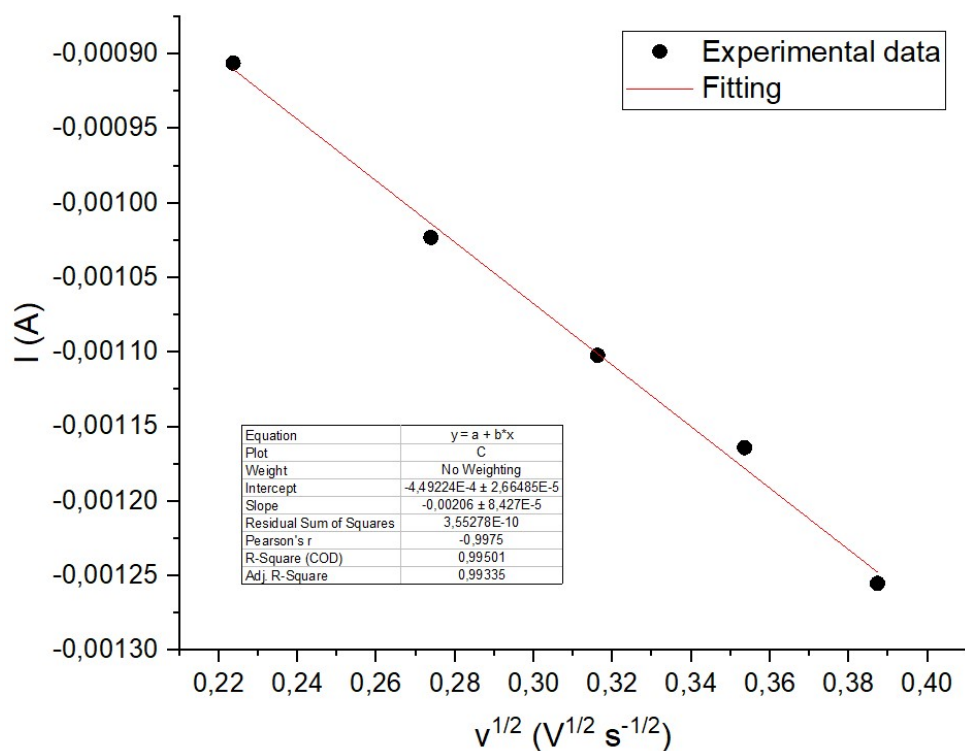

**Figure S77.** Fitting of data reported in Figure 6b according to Randles-Sevcik method for the determination of  $D$ .

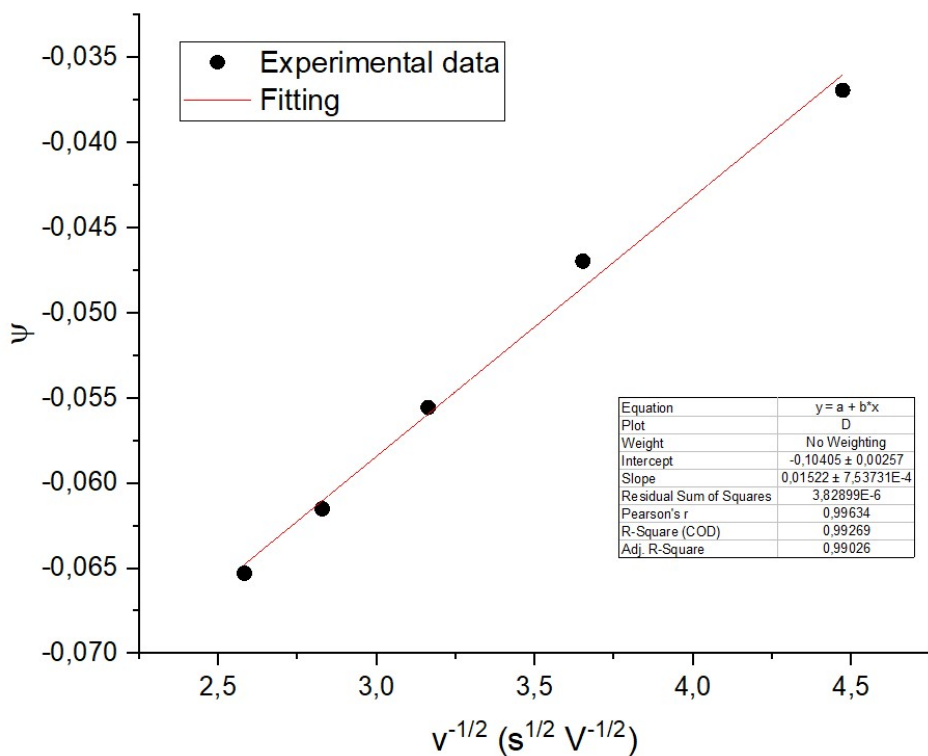

**Figure S78.** Fitting of data reported in Figure 6b according to Nicholson method for the determination of  $k_0$ .
